# Supplementary material
Source: PubMed Central journal article supplement (PMC4807286)
Supplement: 10.1074_M115.702787_jbc.M115.702787-1.pdf [file 10.1074_M115.702787_jbc.M115.702787-1.pdf]

**Mitigation of NADPH oxidase 2 activity as a strategy to inhibit peroxynitrite formation**

Jacek Zielonka, Monika Zielonka, Lynn VerPlank, Gang Cheng, Micael Hardy, Olivier Ouari,  
Mehmet Menaf Ayhan, Radoslaw Podsiadly, Adam Sikora, J. David Lambeth,  
Balaraman Kalyanaraman

**SUPPLEMENTAL DATA**

**SUPPLEMENTAL TABLE S-1:** List of all the compounds tested for Nox2 activity (using three different probes) at Broad Institute Screening Facility, and the normalized scores.

# Supplemental Table S-1

| no. | Compound<br>Name                                                                 | Broad Institute ID     | Normalized scores |         |         |         |                |         |
|-----|----------------------------------------------------------------------------------|------------------------|-------------------|---------|---------|---------|----------------|---------|
|     |                                                                                  |                        | HPr+ DNA          |         | CBA     |         | Amplex Red_HRP |         |
|     |                                                                                  |                        | Plate 1           | Plate 2 | Plate 1 | Plate 2 | Plate 1        | Plate 2 |
| 1   | HEMADO                                                                           | BRD-A00267231-001-01-1 | -16.0             | -18.0   | 29.5    | 39.9    | 37.5           | 18.5    |
| 2   | (+)-UH 232 maleate                                                               | BRD-A00327403-103-01-9 | 9.2               | 20.3    | 23.6    | -4.7    | 12.3           | 24.4    |
| 3   | AF-DX 116                                                                        | BRD-A00520476-001-03-3 | -17.6             | 0.7     | -3.4    | 7.5     | 3.1            | 6.2     |
| 4   | BIPERIDEN                                                                        | BRD-A00546892-001-01-8 | -6.4              | 3.5     | -0.5    | -9.5    | 1.2            | 7.6     |
| 5   | DYPHYLLINE                                                                       | BRD-A00827783-001-15-4 | -14.7             | 3.0     | -5.4    | -11.1   | 3.1            | 18.6    |
| 6   | ALPRENOLOL                                                                       | BRD-A00993607-003-15-4 | -16.4             | -40.9   | -21.4   | -20.7   | -9.4           | -6.3    |
| 7   | HEXESTROL                                                                        | BRD-A01078468-001-08-0 | -12.0             | 38.2    | -30.9   | -22.3   | -7.4           | -10.0   |
| 8   | Salmeterol                                                                       | BRD-A01320529-001-05-9 | -8.7              | -10.1   | -18.0   | -18.8   | -22.3          | -17.2   |
| 9   | FLUMETHASONE                                                                     | BRD-A01346607-001-03-4 | 6.7               | 4.3     | 4.6     | 0.8     | 9.8            | 11.5    |
| 10  | WB 4101 hydrochloride                                                            | BRD-A01493904-003-05-5 | 2.1               | -16.5   | -13.6   | -16.4   | -0.9           | -2.6    |
| 11  | CHLORMADINONE ACETATE                                                            | BRD-A01593789-001-02-3 | -40.9             | -17.7   | -34.9   | -25.4   | -12.4          | -11.0   |
| 12  | BUPIVACAINE HYDROCHLORIDE                                                        | BRD-A01636364-003-08-6 | 4.6               | 10.3    | 0.8     | -12.8   | 4.4            | 9.6     |
| 13  | NAFTOPIDIL DIHYDROCHLORIDE                                                       | BRD-A01787639-300-04-5 | -10.1             | -4.4    | -6.2    | -0.9    | -11.7          | -16.9   |
| 14  | NITRENDIPINE                                                                     | BRD-A02006392-001-09-9 | -53.2             | -4.3    | -33.7   | -27.4   | -16.2          | -19.2   |
| 15  | BETAMETHASONE                                                                    | BRD-A02180903-001-03-7 | -16.4             | -8.1    | 11.2    | 19.7    | 18.2           | 18.7    |
| 16  | DIHYDROCELASTRYL DIACETATE                                                       | BRD-A02267565-001-02-3 | 20.1              | -7.1    | -43.6   | -31.0   | -33.0          | -42.4   |
| 17  | ETHINYL ESTRADIOL                                                                | BRD-A02367930-001-03-7 | 11.6              | 6.9     | -30.6   | -12.8   | -4.6           | 0.0     |
| 18  | NMDA                                                                             | BRD-A02508087-001-01-1 | 6.5               | -14.2   | 5.3     | 17.7    | 6.9            | 19.8    |
| 19  | Betaxolol hydrochloride                                                          | BRD-A02759312-003-11-2 | -5.8              | 15.2    | -7.1    | -3.8    | 12.2           | 7.8     |
| 20  | DEOXYANDIROBIN                                                                   | BRD-A02799884-001-03-7 | -7.7              | -3.1    | -11.4   | -6.1    | -10.0          | -7.6    |
| 21  | MEPIVACAINE HYDROCHLORIDE                                                        | BRD-A03216249-003-12-8 | -28.6             | -1.6    | -2.1    | 6.4     | 5.4            | -6.8    |
| 22  | ICI-89406                                                                        | BRD-A03359064-001-01-5 | 2.4               | 8.4     | 21.4    | 18.1    | 19.5           | 26.1    |
| 23  | ROSMARINIC ACID                                                                  | BRD-A03397678-001-06-2 | 37.8              | 30.7    | -8.9    | 3.4     | -57.1          | -52.8   |
| 24  | METOPROLOL TARTRATE                                                              | BRD-A03623303-045-05-3 | -3.3              | -13.0   | -9.5    | -9.7    | 8.2            | -1.3    |
| 25  | CP 55,940                                                                        | BRD-A03816571-001-01-0 | -11.6             | -15.7   | -64.2   | -82.3   | -40.4          | -45.0   |
| 26  | METHSCOPOLAMINE BROMIDE                                                          | BRD-A03932035-004-03-5 | -21.8             | 21.8    | 18.3    | 26.2    | 22.1           | 21.0    |
| 27  | YO-2                                                                             | BRD-A04026261-001-01-0 | 1.5               | 0.4     | 18.5    | 20.6    | 22.5           | 12.4    |
| 28  | ?-Funaltrexamine hydrochloride                                                   | BRD-A04231641-003-01-3 | 2.4               | -7.9    | -9.9    | 3.5     | -4.8           | -5.0    |
| 29  | U-54494A hydrochloride                                                           | BRD-A04258855-003-01-7 | -11.6             | 3.7     | 1.7     | -3.3    | 0.2            | 2.6     |
| 30  | SKF 83959 hydrobromide                                                           | BRD-A04260165-004-02-4 | -32.6             | -34.7   | -25.6   | -30.7   | -54.3          | -55.7   |
| 31  | DEXCHLORPHENIRAMINE MALEATE                                                      | BRD-A04553218-050-08-9 | -9.8              | -11.8   | -33.9   | -41.3   | -17.8          | -10.9   |
| 32  | 2-[(4-Phenylpiperazin-1-yl)methyl]-2,3-dihydroimidazo[1,2-c]quinazolin-5(6H)-one | BRD-A04661934-001-01-1 | 0.5               | -2.0    | -25.5   | -32.7   | -13.3          | -10.4   |
| 33  | Dibutyl- <i>c</i> AMP, sodium salt                                               | BRD-A04706586-236-01-7 | -7.4              | -3.4    | 6.2     | 4.0     | 0.0            | 3.2     |
| 34  | NORGESTIMATE                                                                     | BRD-A04756508-001-01-5 | -22.2             | -17.5   | -30.7   | -9.3    | -8.1           | 0.2     |
| 35  | 1,2alpha-EPOXYDEACETOXYDIHYDROGEDUNIN                                            | BRD-A04975445-001-03-3 | 9.9               | -5.9    | -4.2    | 10.8    | 6.7            | -2.7    |
| 36  | BUPROPION                                                                        | BRD-A05186015-003-09-9 | 0.4               | -4.3    | -0.3    | -5.7    | 10.3           | 3.1     |
| 37  | Ipratropium bromide                                                              | BRD-A05352148-004-02-0 | 12.4              | -4.9    | 10.8    | 2.0     | -2.9           | 0.7     |
| 38  | TRIDESACETOXYKHIVORIN                                                            | BRD-A05422420-001-03-4 | -26.0             | 17.0    | -16.4   | -11.1   | -8.3           | 2.5     |
| 39  | (?) - Bay K 8644                                                                 | BRD-A05457250-001-04-3 | -6.7              | -5.8    | -11.8   | -11.4   | -14.8          | -9.1    |
| 40  | SOLIDAGENONE                                                                     | BRD-A05666893-001-03-4 | -14.5             | -13.0   | -48.3   | -40.6   | -32.0          | -34.3   |
| 41  | HEDERAGENIN                                                                      | BRD-A05987535-001-03-8 | -9.6              | -4.9    | 22.4    | 33.9    | 23.8           | 28.3    |
| 42  | ETICLOPRIDE HYDROCHLORIDE                                                        | BRD-A05994177-003-02-5 | 3.3               | 5.1     | -24.7   | -8.9    | -17.9          | -18.9   |
| 43  | EPOXYGEDUNIN                                                                     | BRD-A06232236-001-03-0 | -13.4             | -15.3   | -5.1    | 6.0     | -5.1           | -8.5    |

| no. | Compound<br>Name                               | Broad Institute ID     | Normalized scores |         |         |         |                |         |
|-----|------------------------------------------------|------------------------|-------------------|---------|---------|---------|----------------|---------|
|     |                                                |                        | HPr+ DNA          |         | CBA     |         | Amplex Red_HRP |         |
|     |                                                |                        | Plate 1           | Plate 2 | Plate 1 | Plate 2 | Plate 1        | Plate 2 |
| 44  | N-Benzylaltrindole hydrochloride               | BRD-A06276885-003-01-1 | -34.6             | -50.6   | 15.6    | 9.3     | -85.3          | -83.6   |
| 45  | TERFENADINE                                    | BRD-A06352418-001-15-0 | -12.0             | -18.8   | -85.5   | -84.0   | -41.5          | -52.5   |
| 46  | HYDROQUINIDINE                                 | BRD-A06390036-001-03-8 | -7.5              | -13.3   | -8.0    | 4.8     | 0.6            | 4.1     |
| 47  | DEACETYLGEDUNIN                                | BRD-A06561405-001-03-7 | -15.5             | -15.3   | -29.6   | -19.3   | -32.7          | -14.9   |
| 48  | FUSIDIC ACID                                   | BRD-A06935312-001-03-5 | 7.8               | 8.0     | 3.2     | 22.8    | 13.2           | 8.7     |
| 49  | HYDROCORTISONE HEMISUCCINATE                   | BRD-A07000685-001-03-6 | 4.4               | -11.2   | 0.4     | 21.4    | 1.8            | 7.9     |
| 50  | ONDANSETRON                                    | BRD-A07195938-001-01-3 | 6.9               | -13.7   | 0.6     | 3.2     | 7.4            | 5.1     |
| 51  | 4-(3-BUTOXY-4-METHOXYBENZYL)IMIDAZOLIDIN-2-ONE | BRD-A07207424-001-09-0 | 7.4               | 15.4    | 8.7     | 28.6    | 17.6           | 30.3    |
| 52  | 8-M-PDOT                                       | BRD-A07232941-001-01-9 | -7.1              | -2.8    | 8.3     | 28.6    | 19.2           | 11.9    |
| 53  | LABELALOL HYDROCHLORIDE                        | BRD-A07440155-003-16-3 | -9.9              | -8.3    | 9.7     | 15.5    | 3.9            | 9.2     |
| 54  | MECLOCYCLINE SULFOSALICYLATE                   | BRD-A07600638-060-03-7 | 35.9              | 28.7    | -24.4   | -13.7   | -30.7          | -57.0   |
| 55  | Cilnidipine                                    | BRD-A07875874-001-01-6 | -8.7              | -15.8   | -37.0   | -44.3   | -20.4          | -25.8   |
| 56  | Methiohepin maleate                            | BRD-A07932845-103-01-5 | -111.0            | -108.1  | -101.2  | -102.4  | -83.8          | -85.8   |
| 57  | FAMPROFAZONE                                   | BRD-A08255417-001-06-3 | -24.6             | 1.9     | -54.5   | -23.9   | -15.3          | -10.0   |
| 58  | DOXYCYCLINE HYDROCHLORIDE                      | BRD-A08545410-003-03-7 | 5.3               | 5.1     | -86.9   | -93.1   | -90.1          | -89.7   |
| 59  | ALFLUZOSIN                                     | BRD-A09056319-001-05-5 | -24.6             | -2.4    | 19.3    | 24.4    | 10.7           | 16.6    |
| 60  | STRYCHNINE                                     | BRD-A09094913-001-03-1 | -9.3              | -1.6    | -5.6    | 8.5     | 11.4           | 15.3    |
| 61  | NORETHINDRONE ACETATE                          | BRD-A09349126-001-06-5 | -9.4              | -12.6   | -14.6   | -6.3    | -7.4           | -14.3   |
| 62  | MEBEVERINE HYDROCHLORIDE                       | BRD-A09467419-003-14-1 | -3.9              | 3.8     | 0.8     | 17.2    | -8.3           | -0.4    |
| 63  | Flecainide acetate                             | BRD-A09472452-015-11-9 | 16.3              | -3.4    | 3.9     | 17.2    | 15.0           | 12.3    |
| 64  | BICUCULLINE (+)                                | BRD-A09495397-001-03-5 | -14.7             | -1.7    | -3.4    | 0.8     | -2.5           | 12.0    |
| 65  | HOMATROPINE BROMIDE                            | BRD-A09539288-004-03-6 | 0.4               | -4.8    | -4.0    | -0.5    | 4.9            | 6.6     |
| 66  | SKF 81297 hydrobromide                         | BRD-A09828896-004-04-5 | 2.9               | 4.4     | -0.3    | -14.5   | -41.7          | -39.8   |
| 67  | ALGESTERONE ACETOPHENIDE                       | BRD-A09977907-001-01-9 | -7.4              | -5.2    | -8.2    | 20.1    | -1.7           | 8.9     |
| 68  | PROPRANOLOL HYDROCHLORIDE (+/-)                | BRD-A10070317-003-17-6 | -14.0             | -14.5   | -74.9   | -48.8   | -44.1          | -37.9   |
| 69  | DEXAMETHASONE                                  | BRD-A10188456-001-03-1 | 0.5               | -2.1    | 21.9    | 22.2    | -1.7           | 11.5    |
| 70  | Norketamine hydrochloride                      | BRD-A10355991-003-01-8 | -3.5              | -16.4   | -14.1   | -17.0   | -0.5           | 2.8     |
| 71  | Cyclopiazonic Acid                             | BRD-A10420615-001-03-6 | -1.3              | 12.4    | 0.0     | -8.7    | -4.8           | 3.5     |
| 72  | SULPIRIDE                                      | BRD-A10715913-001-03-8 | -12.9             | 9.2     | 16.4    | 7.0     | -7.1           | 5.9     |
| 73  | EFAROXAN HYDROCHLORIDE                         | BRD-A10739734-003-05-6 | -2.8              | -4.6    | 5.9     | 26.4    | 1.6            | 2.0     |
| 74  | Imiloxan hydrochloride                         | BRD-A10903566-003-02-8 | -10.1             | -9.6    | -5.7    | -12.3   | 6.5            | 5.1     |
| 75  | CARVEDILOL                                     | BRD-A10977446-001-05-5 | -6.0              | -15.7   | -24.0   | -31.8   | -12.9          | -17.7   |
| 76  | BECLOMETHASONE DIPROPIONATE                    | BRD-A11319535-001-02-8 | -12.1             | -8.2    | 5.1     | 13.5    | 0.0            | 7.0     |
| 77  | DEHYDROCHOLIC ACID                             | BRD-A11551002-001-03-8 | 5.1               | 11.2    | -3.6    | -5.6    | -0.9           | -3.1    |
| 78  | SB 205607 dihydrobromide                       | BRD-A11609859-303-01-2 | -3.2              | -5.4    | -0.7    | -3.5    | -4.3           | -3.3    |
| 79  | Wortmannin                                     | BRD-A11678676-001-03-4 | 48.9              | 43.2    | 21.5    | 21.4    | -4.7           | -8.5    |
| 80  | ENILCONAZOLE                                   | BRD-A11776908-001-06-9 | -7.7              | -3.6    | -20.5   | -13.1   | -4.5           | 1.5     |
| 81  | AM 92016 hydrochloride                         | BRD-A11813248-003-01-6 | -24.5             | -17.3   | -45.0   | -38.1   | -38.5          | -39.4   |
| 82  | PROTOVERATRINE A                               | BRD-A12055418-001-03-7 | -23.7             | 21.6    | -10.9   | 17.6    | 0.3            | 16.5    |
| 83  | 1,7-DIDEACETOXY-1,7-DIOXO-3-DEACETYLKHIVORIN   | BRD-A12372458-001-03-7 | -4.8              | -3.4    | -16.3   | 15.8    | -9.6           | -1.1    |
| 84  | p-FLUOROPHENYLALANINE                          | BRD-A12490356-001-03-0 | -13.8             | -1.1    | -2.6    | 0.9     | 5.1            | 5.4     |
| 85  | (-)-U-50488 hydrochloride                      | BRD-A12822115-003-01-6 | -0.8              | 3.5     | 5.8     | 13.1    | -22.0          | -12.0   |
| 86  | FLUOROMETHOLONE                                | BRD-A13133631-001-03-2 | 8.4               | -11.0   | -7.0    | -11.7   | 5.2            | 8.5     |
| 87  | DOXAZOSIN MESYLATE                             | BRD-A13188892-066-13-2 | -6.4              | 2.6     | 14.0    | 10.8    | 1.9            | 7.2     |
| 88  | PERILLYL ALCOHOL                               | BRD-A13323580-001-03-0 | -22.6             | 7.3     | -7.8    | 10.0    | -3.6           | -7.0    |
| 89  | KHIVORIN                                       | BRD-A13569698-001-03-7 | -10.8             | 1.7     | -5.3    | -19.5   | -10.8          | -8.3    |

| no. | Compound<br>Name                      | Broad Institute ID     | Normalized scores |         |         |         |                |         |
|-----|---------------------------------------|------------------------|-------------------|---------|---------|---------|----------------|---------|
|     |                                       |                        | HPr+ DNA          |         | CBA     |         | Amplex Red_HRP |         |
|     |                                       |                        | Plate 1           | Plate 2 | Plate 1 | Plate 2 | Plate 1        | Plate 2 |
| 90  | DOBUTAMINE HYDROCHLORIDE              | BRD-A13912374-003-03-6 | 45.3              | 23.9    | 54.3    | 58.2    | -12.9          | -12.3   |
| 91  | SULINDAC                              | BRD-A13946108-001-08-0 | 1.1               | 16.9    | -10.6   | 1.2     | -20.7          | -19.4   |
| 92  | TC 1                                  | BRD-A13964793-001-01-8 | 12.1              | 14.0    | 39.5    | 36.8    | 12.8           | 23.1    |
| 93  | 3alpha-ACETOXYDIHYDRODEOXYGEDUNIN     | BRD-A14098586-001-03-1 | -23.6             | -14.7   | -22.4   | -29.2   | 1.7            | 4.8     |
| 94  | OXYPHENONIUM BROMIDE                  | BRD-A14208071-004-10-7 | 11.3              | 1.9     | 6.5     | 17.5    | 16.9           | 21.4    |
| 95  | SN-6                                  | BRD-A14316475-001-01-5 | -15.3             | -23.0   | -52.6   | -45.6   | -47.6          | -56.6   |
| 96  | IDRA 21                               | BRD-A14344385-001-02-4 | -5.5              | -35.7   | -5.3    | 17.2    | 5.0            | 8.9     |
| 97  | Scopolamine hydrobromide              | BRD-A14566392-004-03-5 | -6.8              | 14.0    | 5.2     | 17.8    | 10.0           | 7.5     |
| 98  | UB 165 fumarate                       | BRD-A14574269-051-01-4 | -8.1              | -7.9    | 6.3     | -4.9    | -5.6           | 14.2    |
| 99  | MESTRANOL                             | BRD-A14798026-001-01-8 | 8.9               | 5.8     | 30.6    | 44.2    | 9.1            | -2.9    |
| 100 | ALAPROCLATE                           | BRD-A14966924-001-03-0 | -29.1             | -27.3   | -25.1   | -22.2   | -13.5          | -17.9   |
| 101 | Benazepril hydrochloride              | BRD-A15131297-003-01-9 | -16.0             | 57.2    | 12.3    | 25.5    | 6.5            | 7.3     |
| 102 | FLUOCINONIDE                          | BRD-A15297126-001-03-5 | -21.4             | 3.5     | -27.5   | -15.8   | -3.2           | -0.8    |
| 103 | BMY 14802 hydrochloride               | BRD-A15435692-003-01-5 | 3.3               | -3.9    | 60.3    | -8.2    | 15.9           | 11.5    |
| 104 | 6-HYDROXYANGOLENSIC ACID METHYL ESTER | BRD-A15454510-001-03-6 | 1.4               | -1.1    | 0.1     | 1.6     | -9.0           | -11.2   |
| 105 | SDZ 21009                             | BRD-A15530910-001-01-3 | -4.1              | -0.9    | -26.6   | -31.4   | 3.9            | 1.5     |
| 106 | ISOFLUPREDNONE ACETATE                | BRD-A15670677-001-01-0 | 15.1              | -17.7   | -6.2    | -15.8   | -2.8           | 7.9     |
| 107 | TELITHROMYCIN                         | BRD-A15798299-001-02-5 | -4.6              | -3.4    | 23.9    | 25.4    | 1.3            | 3.8     |
| 108 | REBAMIPIDE                            | BRD-A15909516-001-03-3 | 0.6               | -11.6   | 20.5    | 18.0    | 3.5            | 7.4     |
| 109 | MODAFINIL                             | BRD-A16332958-001-04-0 | -1.2              | -5.8    | 6.0     | 4.7     | 0.5            | 9.7     |
| 110 | BUTOCONAZOLE                          | BRD-A16665823-001-01-2 | -50.8             | -32.1   | -85.7   | -82.4   | -61.3          | -69.1   |
| 111 | BADGE                                 | BRD-A16694057-001-03-5 | 2.8               | -13.9   | 20.4    | 27.9    | 1.2            | 0.9     |
| 112 | ISOXSUPRINE HYDROCHLORIDE             | BRD-A16700644-003-03-6 | 16.7              | 16.0    | -7.1    | -4.9    | -18.0          | -16.1   |
| 113 | 2-Chloro-N6-cyclopentyladenosine      | BRD-A16827030-001-01-7 | 0.2               | -10.3   | 6.1     | 7.8     | 24.6           | 13.5    |
| 114 | 8beta-HYDROXYCARAPIN, 3,8-HEMIACETAL  | BRD-A17120244-001-03-4 | -6.2              | 15.3    | -1.5    | 0.9     | -1.8           | 21.0    |
| 115 | CARPROFEN                             | BRD-A17411484-001-05-1 | 2.3               | 1.3     | -13.9   | -8.0    | -1.9           | -1.2    |
| 116 | BW 723C86 hydrochloride               | BRD-A17428743-003-03-3 | -19.3             | -23.9   | -39.5   | -47.7   | -51.0          | -39.0   |
| 117 | MDL 72832 hydrochloride               | BRD-A17453586-003-01-5 | 7.2               | -8.7    | -32.3   | -18.8   | 13.5           | 16.3    |
| 118 | BAMBUTEROL HYDROCHLORIDE              | BRD-A17462676-003-06-6 | -20.4             | 0.3     | -5.4    | -3.9    | 5.4            | 8.5     |
| 119 | IBUPROFEN                             | BRD-A17655518-001-12-9 | 16.0              | -6.5    | -1.8    | -10.2   | 6.1            | 10.4    |
| 120 | a-Methyl-5-hydroxytryptamine maleate  | BRD-A17745711-103-01-0 | -25.8             | -19.9   | 5.6     | 6.5     | -37.3          | -39.7   |
| 121 | DIHYDROMUNDULETONE                    | BRD-A17831693-001-03-2 | 16.9              | 8.6     | -11.5   | 6.9     | -3.3           | -17.5   |
| 122 | TROLOX                                | BRD-A17846016-001-07-1 | -41.4             | -10.6   | 32.9    | 17.6    | -30.1          | -30.6   |
| 123 | CPCCOEt                               | BRD-A18202423-001-01-6 | -2.6              | 11.1    | 23.3    | 12.9    | 13.9           | 8.8     |
| 124 | Etoposide                             | BRD-A18419789-001-01-4 | 9.9               | 0.6     | -4.0    | 11.5    | -12.4          | -12.9   |
| 125 | ESTRIOL                               | BRD-A18620900-001-04-5 | -16.4             | 5.1     | -22.5   | -24.9   | -1.1           | -9.1    |
| 126 | IDAZOXAN HYDROCHLORIDE                | BRD-A18696154-003-14-3 | -12.9             | -29.3   | -38.3   | -45.6   | -38.8          | -41.6   |
| 127 | DIHYDROROTENONE                       | BRD-A18788061-001-03-7 | 24.2              | 16.7    | -8.2    | 3.9     | -13.2          | -10.9   |
| 128 | 7-Hydroxy-DPAT hydrobromide           | BRD-A18795974-004-02-4 | -0.2              | 22.3    | 20.7    | 30.8    | 12.4           | 3.2     |
| 129 | ESTRADIOL                             | BRD-A18917088-001-03-1 | 17.4              | -17.6   | -16.6   | -25.9   | -20.1          | -24.4   |
| 130 | TRIMIPRAMINE MALEATE                  | BRD-A19195498-050-09-1 | -58.3             | -57.6   | -103.7  | -99.4   | -82.3          | -82.5   |
| 131 | Vinpocetine                           | BRD-A19374631-001-01-0 | -14.8             | -9.4    | -31.3   | -27.9   | -28.0          | -21.0   |
| 132 | METHYLPHENIDATE HYDROCHLORIDE         | BRD-A19585813-003-01-7 | 11.1              | -12.2   | -9.3    | 6.1     | 4.9            | 13.6    |
| 133 | MIANSERIN HYDROCHLORIDE               | BRD-A19661776-003-16-9 | -12.3             | -9.6    | -22.7   | -11.5   | -33.9          | -26.7   |
| 134 | Atovaquone                            | BRD-A19795905-001-05-6 | -19.9             | 5.3     | 1.4     | 26.3    | 9.1            | 22.4    |
| 135 | MEDRYSONE                             | BRD-A20126139-001-03-4 | -1.0              | -18.6   | -33.0   | -20.2   | -12.2          | -8.7    |

| no. | Compound<br>Name                            | Broad Institute ID     | Normalized scores |         |         |         |                |         |
|-----|---------------------------------------------|------------------------|-------------------|---------|---------|---------|----------------|---------|
|     |                                             |                        | HPr+ DNA          |         | CBA     |         | Amplex Red_HRP |         |
|     |                                             |                        | Plate 1           | Plate 2 | Plate 1 | Plate 2 | Plate 1        | Plate 2 |
| 136 | 3-DEOXO-3beta-ACETOXYDEOXYDIHYDROGEDUNIN    | BRD-A20182314-001-03-4 | 30.5              | 10.2    | 20.0    | 18.0    | -1.8           | 0.2     |
| 137 | ATENOLOL                                    | BRD-A20239487-001-15-7 | 7.9               | 23.4    | 11.3    | 13.1    | 12.5           | 0.4     |
| 138 | Danazol                                     | BRD-A20243730-001-01-4 | -63.6             | -53.3   | -84.3   | -86.0   | -37.8          | -34.9   |
| 139 | 18alpha-GLYCYRRHETINIC ACID                 | BRD-A20256229-001-04-8 | -21.5             | -18.0   | -73.8   | -66.0   | -29.2          | -11.6   |
| 140 | CHLORMEZANONE                               | BRD-A20348246-001-08-3 | 21.4              | -0.1    | -10.2   | -22.3   | -8.0           | -4.6    |
| 141 | DEOXSAPPANONE B 7,3'-DIMETHYL ETHER ACETATE | BRD-A20368188-001-03-2 | 1.8               | -4.2    | 12.1    | 43.8    | -21.5          | -19.0   |
| 142 | IB-MECA                                     | BRD-A20527803-001-01-2 | -12.8             | 4.0     | 24.1    | 38.9    | 24.5           | 14.1    |
| 143 | CANRENONE                                   | BRD-A20644369-001-04-5 | -12.7             | -11.3   | -25.0   | -14.2   | -21.0          | -16.8   |
| 144 | WAY 213613                                  | BRD-A20968261-001-01-3 | 6.6               | 1.2     | -27.7   | -18.0   | 5.6            | 12.2    |
| 145 | EPI(13)TORULOSOL                            | BRD-A21113731-001-03-3 | -16.8             | -0.1    | -15.9   | -8.4    | -12.0          | -23.0   |
| 146 | MEROGEDUNIN                                 | BRD-A21423998-001-03-4 | 3.5               | -10.9   | -4.7    | -3.1    | -6.9           | -10.6   |
| 147 | SNAP 5089                                   | BRD-A21428877-003-01-9 | -68.0             | -85.9   | -98.2   | -106.5  | -87.4          | -90.2   |
| 148 | Naltriben mesylate                          | BRD-A21723284-066-01-7 | -7.5              | -3.3    | -20.4   | 0.0     | -48.2          | -52.3   |
| 149 | AMLODIPINE BESYLATE                         | BRD-A22032524-074-04-0 | -26.6             | -27.2   | -61.5   | -67.3   | -54.7          | -57.5   |
| 150 | SULMAZOLE                                   | BRD-A22081593-001-06-1 | -3.4              | -10.2   | 5.2     | 12.0    | 14.1           | 19.1    |
| 151 | PHENOTHRIN                                  | BRD-A22106989-001-02-7 | -18.5             | -4.5    | -7.7    | 25.1    | 25.8           | 36.8    |
| 152 | PARAMETHADIONE                              | BRD-A22128695-001-01-8 | -10.8             | 5.5     | -3.9    | -2.0    | -5.3           | 7.2     |
| 153 | ESTROPIPATE                                 | BRD-A22143024-231-02-0 | -5.2              | -15.9   | 5.8     | 6.4     | 3.9            | 15.6    |
| 154 | TERAZOSIN HYDROCHLORIDE                     | BRD-A22256192-003-14-4 | -7.9              | -8.4    | 103.5   | 129.1   | 0.9            | 2.1     |
| 155 | DROFENINE HYDROCHLORIDE                     | BRD-A22267103-003-08-1 | -9.8              | -10.3   | -41.0   | -26.1   | -37.5          | -30.0   |
| 156 | BENFLUOREX HYDROCHLORIDE                    | BRD-A22305049-003-08-6 | -38.7             | -33.0   | -71.9   | -61.0   | -47.7          | -52.3   |
| 157 | PANTOPRAZOLE                                | BRD-A22380646-001-02-3 | -3.1              | -13.2   | -0.4    | 15.5    | 3.3            | -12.0   |
| 158 | Procaterol hydrochloride                    | BRD-A22684332-003-03-1 | 7.1               | 3.4     | 20.6    | 18.2    | 16.3           | 12.4    |
| 159 | SB 205384                                   | BRD-A22707317-001-02-5 | 0.1               | -5.2    | -4.8    | -3.2    | 2.5            | 6.6     |
| 160 | BVT 948                                     | BRD-A22713669-001-01-9 | 6.9               | -6.6    | 19.0    | 25.1    | -18.3          | -26.8   |
| 161 | Vinblastine sulfate                         | BRD-A22783572-065-01-3 | 4.6               | 7.4     | 20.2    | 24.1    | 11.8           | 9.0     |
| 162 | TENOXICAM                                   | BRD-A22844106-001-16-1 | 71.6              | 37.9    | 63.4    | 64.3    | 11.0           | 11.3    |
| 163 | DIHYDROGEDUNIN                              | BRD-A22963354-001-03-6 | -20.7             | 2.6     | 0.3     | 2.4     | -27.4          | -35.7   |
| 164 | CLINDAMYCIN HYDROCHLORIDE                   | BRD-A23034328-003-06-7 | -20.0             | -23.1   | -1.4    | 1.2     | 2.8            | 2.6     |
| 165 | ITRACONAZOLE                                | BRD-A23067620-001-01-7 | 1.4               | 21.9    | -11.8   | 2.9     | -25.6          | -25.3   |
| 166 | PHENIRAMINE MALEATE                         | BRD-A23072235-050-09-4 | -15.9             | 5.5     | 1.4     | 31.2    | 7.2            | 4.8     |
| 167 | ESTRADIOL ACETATE                           | BRD-A23226398-001-04-3 | -2.8              | 4.8     | -13.1   | -23.6   | 3.5            | 8.5     |
| 168 | RIFAMPIN                                    | BRD-A23603052-001-02-4 | 79.1              | 82.7    | 5.0     | 12.0    | -51.2          | -47.8   |
| 169 | NAS-181                                     | BRD-A23683907-334-01-0 | 32.8              | 23.7    | 34.7    | 18.5    | 11.6           | 17.2    |
| 170 | Taxol                                       | BRD-A23723433-001-01-2 | 4.5               | -0.3    | 13.4    | 30.0    | 9.1            | -0.5    |
| 171 | THIAMYLAL SODIUM                            | BRD-A23970436-236-03-4 | -20.4             | -32.2   | -10.9   | -5.9    | -8.8           | -10.3   |
| 172 | Saclofen                                    | BRD-A24122750-001-02-9 | -4.4              | 13.4    | 3.5     | -2.7    | 6.8            | 5.3     |
| 173 | OFLOXACIN                                   | BRD-A24228527-001-19-0 | 3.5               | -12.8   | 31.1    | 50.7    | 5.9            | 19.3    |
| 174 | ANABASINE HYDROCHLORIDE                     | BRD-A24284985-003-03-8 | 27.0              | 16.5    | 8.9     | 32.6    | 3.4            | 10.9    |
| 175 | HEAT hydrochloride                          | BRD-A24429032-003-01-6 | -39.4             | -40.4   | -75.1   | -79.4   | -51.0          | -52.9   |
| 176 | PUERARIN                                    | BRD-A24433358-001-04-2 | -16.6             | -6.7    | -2.3    | 24.4    | 5.5            | 11.4    |
| 177 |                                             | BRD-A24514565-236-01-6 | 7.7               | 7.8     | 27.8    | 31.3    | 4.6            | 18.4    |
| 178 | ISOETHARINE MESYLATE                        | BRD-A24587114-066-14-2 | 7.0               | 12.7    | 43.6    | 58.2    | 12.8           | 21.8    |
| 179 | HYDROCORTISONE VALERATE                     | BRD-A25143711-001-01-4 | -15.9             | -41.7   | -60.1   | -44.7   | -40.7          | -49.1   |
| 180 | AMINOGLUTETHIMIDE                           | BRD-A25234499-001-09-2 | -1.9              | 0.1     | 15.0    | 25.0    | 14.5           | 5.8     |
| 181 | DEOXYGEDUNIN                                | BRD-A25243629-001-03-9 | -5.9              | -8.6    | -27.6   | -16.3   | -30.9          | -34.7   |

| no. | Compound<br>Name                      | Broad Institute ID     | Normalized scores |         |         |         |                |         |
|-----|---------------------------------------|------------------------|-------------------|---------|---------|---------|----------------|---------|
|     |                                       |                        | HPr+ DNA          |         | CBA     |         | Amplex Red_HRP |         |
|     |                                       |                        | Plate 1           | Plate 2 | Plate 1 | Plate 2 | Plate 1        | Plate 2 |
| 182 | DEACETOXY-7-OXOGEDUNIN                | BRD-A25408073-001-03-9 | -0.9              | 15.4    | -17.6   | -7.9    | 0.8            | -10.8   |
| 183 | FENBUTYRAMIDE                         | BRD-A25537246-001-03-7 | -8.7              | -9.6    | -0.9    | 0.1     | 1.4            | 4.9     |
| 184 | EMETINE                               | BRD-A25687296-300-03-5 | 2.2               | -23.0   | -19.1   | -7.8    | -16.6          | -12.1   |
| 185 | ANISODAMINE HYDROBROMIDE              | BRD-A25706161-001-03-9 | -10.7             | -11.4   | -0.3    | 8.5     | 11.6           | 16.7    |
| 186 | CGS 9343B                             | BRD-A26032986-050-01-3 | 11.9              | -8.5    | -2.5    | -5.5    | -6.9           | -6.2    |
| 187 | CLOBETASOL PROPIONATE                 | BRD-A26095496-001-03-2 | 29.1              | 1.8     | 3.2     | -0.4    | 5.0            | 13.3    |
| 188 | bulleyaconitine A                     | BRD-A26097136-001-01-8 | -23.8             | -0.8    | 5.5     | 27.2    | 14.7           | 20.9    |
| 189 | PROPAFENONE HYDROCHLORIDE             | BRD-A26334849-003-16-7 | -21.1             | -13.2   | -48.5   | -46.8   | -15.4          | -24.7   |
| 190 | CHLORTHALIDONE                        | BRD-A26384407-001-15-2 | 14.4              | -3.3    | 1.3     | 2.9     | -2.8           | 14.8    |
| 191 | ERGONOVINE MALEATE                    | BRD-A26387268-050-03-6 | 4.5               | 14.2    | 85.6    | 53.7    | -15.4          | -2.3    |
| 192 | NICARDIPINE HYDROCHLORIDE             | BRD-A26711594-003-06-4 | 20.4              | 14.2    | 11.5    | -2.6    | -10.6          | -6.7    |
| 193 | DESONIDE                              | BRD-A26858303-001-01-0 | 2.3               | -22.8   | -17.9   | -0.8    | -7.6           | 0.7     |
| 194 | 18-AMINOABIETA-8,11,13-TRIENE SULFATE | BRD-A27080191-065-03-6 | 2.9               | -36.9   | -96.4   | -80.6   | -47.6          | -68.2   |
| 195 | DPN                                   | BRD-A27143604-001-01-2 | 7.3               | 0.6     | -7.1    | -5.7    | 7.0            | 8.4     |
| 196 | ALTRENOGEST                           | BRD-A27554692-001-01-3 | 9.3               | -3.9    | -28.2   | -25.4   | -20.9          | -23.2   |
| 197 | PREDNISOLONE                          | BRD-A27887842-001-03-2 | -11.8             | -9.1    | 21.7    | 32.1    | 16.2           | 18.8    |
| 198 | GRISEOFULVIC ACID                     | BRD-A27914728-001-03-3 | 6.5               | -25.3   | -36.2   | 6.2     | 13.6           | 8.3     |
| 199 | 2-Hydroxysaclofen                     | BRD-A27924917-001-01-7 | -1.4              | -3.6    | 1.6     | 19.5    | 6.4            | -7.2    |
| 200 | AMINO BENZOTROPINE                    | BRD-A28095882-001-05-7 | 2.7               | 0.5     | -1.0    | 0.7     | -3.5           | -1.0    |
| 201 | AMT hydrochloride                     | BRD-A28318179-003-03-6 | -10.6             | 0.5     | 13.1    | 11.5    | 14.7           | 21.8    |
| 202 | L-689,560                             | BRD-A28422058-001-01-0 | -1.5              | -0.8    | 18.9    | -9.5    | 23.7           | 21.5    |
| 203 | SELEGILINE HYDROCHLORIDE              | BRD-A28545468-003-10-9 | 4.3               | 6.5     | 9.6     | -0.9    | 5.1            | 3.7     |
| 204 | STRYCHNINE METHIODIDE                 | BRD-A28702443-005-01-0 | 3.9               | 42.7    | -39.0   | -0.1    | 4.3            | 6.7     |
| 205 | PACLITAXEL                            | BRD-A28746609-001-05-7 | 7.9               | -8.0    | -13.3   | -10.3   | 4.8            | 7.0     |
| 206 | TETRAHYDROZOLINE HYDROCHLORIDE        | BRD-A28856712-003-15-3 | -10.0             | 8.4     | 1.9     | 12.1    | 13.5           | 15.5    |
| 207 | PROXYPHYLLINE                         | BRD-A28887267-001-13-6 | -18.2             | -23.6   | 22.2    | 3.0     | 16.9           | 12.0    |
| 208 | TRICHLORMETHIAZIDE                    | BRD-A28940325-001-15-8 | -8.3              | -9.2    | -42.4   | -6.6    | 3.0            | -7.1    |
| 209 | PUROMYCIN HYDROCHLORIDE               | BRD-A28970875-300-03-1 | 25.5              | 16.4    | 27.5    | 24.6    | 3.8            | 9.1     |
| 210 | ETHISTERONE                           | BRD-A29111201-001-03-0 | 6.6               | -8.6    | -36.4   | -19.6   | 4.1            | 0.4     |
| 211 | ACEBUTOLOL HYDROCHLORIDE              | BRD-A29260609-003-15-3 | 22.4              | 45.9    | -7.7    | 29.5    | 20.1           | 18.7    |
| 212 | PCA 4248                              | BRD-A29289453-001-03-9 | 0.8               | 2.7     | 18.0    | 21.3    | 4.9            | 8.4     |
| 213 | CANRENOIC ACID, POTASSIUM SALT        | BRD-A29322418-237-03-2 | 0.3               | -12.2   | 2.9     | -0.6    | 14.3           | 19.3    |
| 214 | DROPROPIZINE                          | BRD-A29349577-001-15-6 | 13.5              | 4.5     | 5.8     | 28.7    | 10.5           | 13.9    |
| 215 | FISSINOLIDE                           | BRD-A29371732-001-03-8 | -2.1              | 0.6     | -10.6   | -14.5   | -0.5           | -5.2    |
| 216 | CARBINOXAMINE MALEATE                 | BRD-A29426959-050-07-4 | -2.8              | -0.4    | -23.8   | -27.7   | -4.2           | -2.1    |
| 217 | RWJ 21757                             | BRD-A29437505-001-01-6 | 1.9               | 4.8     | 22.4    | 24.9    | 24.3           | 15.6    |
| 218 | BICALUTAMIDE                          | BRD-A29485665-001-03-7 | -27.1             | 8.9     | -82.7   | -76.2   | -24.7          | -33.1   |
| 219 | STICTIC ACID                          | BRD-A29578214-001-08-4 | 68.1              | 59.9    | -21.9   | 16.0    | 3.1            | 11.7    |
| 220 | NOMIFENSINE MALEATE                   | BRD-A29644307-050-10-5 | 0.0               | 24.7    | 8.5     | 4.2     | 3.0            | -0.5    |
| 221 | DISOPYRAMIDE PHOSPHATE                | BRD-A29734509-011-06-0 | -17.9             | 19.6    | 11.9    | 25.4    | 11.3           | 12.9    |
| 222 | LORGLUMIDE SODIUM                     | BRD-A29854054-236-07-6 | 2.9               | 23.2    | 2.4     | 12.6    | -0.4           | 0.9     |
| 223 | VANCOMYCIN HYDROCHLORIDE              | BRD-A30133509-003-03-6 | 12.9              | 3.4     | -9.1    | 30.0    | 34.7           | 23.8    |
| 224 | MR 16728 hydrochloride                | BRD-A30590053-003-01-1 | 3.2               | 9.4     | -29.1   | -42.3   | -5.3           | -8.8    |
| 225 | LFM-A13                               | BRD-A30655177-001-06-6 | -11.8             | 6.8     | 15.2    | 25.8    | 13.0           | 17.3    |
| 226 | DIPERODON HYDROCHLORIDE               | BRD-A30693873-003-06-0 | -27.3             | -26.9   | -39.4   | -37.8   | -22.2          | -19.1   |
| 227 | TRIAMCINOLONE DIACETATE               | BRD-A30717181-001-03-5 | 8.3               | 17.1    | 3.9     | 13.0    | 4.3            | 3.2     |

| no. | Compound<br>Name                                                                                     | Broad Institute ID     | Normalized scores |         |         |         |                |         |
|-----|------------------------------------------------------------------------------------------------------|------------------------|-------------------|---------|---------|---------|----------------|---------|
|     |                                                                                                      |                        | HPr+ DNA          |         | CBA     |         | Amplex Red_HRP |         |
|     |                                                                                                      |                        | Plate 1           | Plate 2 | Plate 1 | Plate 2 | Plate 1        | Plate 2 |
| 228 | FLORFENICOL                                                                                          | BRD-A30886737-001-01-1 | 14.4              | 10.5    | -16.7   | -1.3    | 22.5           | 25.9    |
| 229 | SDZ WAG 994                                                                                          | BRD-A31007383-001-01-0 | -7.7              | -2.3    | 3.3     | 0.9     | -6.7           | -6.7    |
| 230 | DESACETYLCOLFORSIN                                                                                   | BRD-A31087826-001-01-7 | 14.0              | 30.8    | 7.7     | 8.4     | 6.0            | 6.5     |
| 231 | FLUOXETINE                                                                                           | BRD-A31159102-003-16-3 | -39.0             | -19.3   | -80.0   | -88.4   | -57.1          | -58.0   |
| 232 | TCB2                                                                                                 | BRD-A31195449-004-01-9 | -11.8             | -5.6    | -13.2   | -21.4   | 5.4            | -3.6    |
| 233 | CGP 20712 dihydrochloride                                                                            | BRD-A31575449-300-01-4 | -14.2             | -3.6    | -5.1    | 1.4     | -5.8           | -1.9    |
| 234 | 3-AMINO-beta-PINENE                                                                                  | BRD-A31576716-003-03-4 | -6.9              | 6.6     | -3.1    | 6.3     | 23.5           | 9.7     |
| 235 | PROCYCLIDINE HYDROCHLORIDE                                                                           | BRD-A31800922-003-15-2 | -17.7             | -31.0   | -24.4   | 9.2     | 7.5            | -4.1    |
| 236 | formestane                                                                                           | BRD-A31801025-001-01-0 | 8.9               | -7.1    | 41.8    | 36.4    | -8.3           | -8.8    |
| 237 | 3-DEACETYLKHIVORIN                                                                                   | BRD-A31863775-001-03-8 | 11.6              | -19.5   | -0.2    | 1.0     | 2.1            | -7.0    |
| 238 | (S)-Timolol maleate                                                                                  | BRD-A31916785-103-01-0 | -6.1              | 1.1     | -9.5    | -2.3    | 3.6            | 8.9     |
| 239 | OLEANOIC ACID                                                                                        | BRD-A31962514-001-03-4 | 6.4               | 10.4    | -9.3    | -16.9   | -17.5          | -17.8   |
| 240 | Methyllycaconitine citrate                                                                           | BRD-A32164164-048-01-4 | -0.3              | 10.0    | 7.8     | -3.8    | 17.5           | 19.9    |
| 241 | 11alpha-HYDROXYPROGESTERONE HEMISUCCINATE                                                            | BRD-A32440707-001-01-1 | -27.1             | -11.6   | 10.3    | 26.7    | 3.3            | 8.5     |
| 242 | TRANDOLAPRIL                                                                                         | BRD-A32505112-001-03-6 | 12.7              | 8.6     | 6.3     | 0.6     | 2.0            | 1.1     |
| 243 | ACECLIDINE                                                                                           | BRD-A32673558-001-01-7 | -13.8             | -10.0   | 9.5     | 5.0     | -9.6           | 3.0     |
| 244 | SALINOMYCIN, SODIUM                                                                                  | BRD-A32757659-236-03-4 | 2.9               | -7.1    | -40.8   | -20.6   | -25.9          | -20.3   |
| 245 | MRS 1845                                                                                             | BRD-A32949107-001-01-7 | 18.9              | 3.0     | 11.0    | 18.6    | -15.0          | -19.6   |
| 246 | TIOCONAZOLE                                                                                          | BRD-A33084557-001-01-7 | -58.3             | -57.5   | -94.3   | -88.9   | -83.4          | -84.1   |
| 247 | DEHYDRODIHYDROROTENONE                                                                               | BRD-A33119430-001-03-0 | 8.5               | 32.9    | -18.2   | 8.8     | 9.1            | 8.4     |
| 248 | Sotalol hydrochloride                                                                                | BRD-A33168282-003-06-5 | -7.6              | -4.1    | 6.4     | 20.2    | 9.1            | 6.9     |
| 249 | OXFENDAZOLE                                                                                          | BRD-A33447119-001-03-3 | -20.4             | 6.0     | 24.2    | 41.1    | 8.3            | 11.5    |
| 250 | LOE 908 hydrochloride                                                                                | BRD-A33676200-003-01-7 | 23.2              | 34.5    | 23.2    | 40.4    | 7.9            | 1.2     |
| 251 | GITOXIN                                                                                              | BRD-A33810106-001-03-7 | 23.1              | 17.9    | 13.9    | 26.8    | 35.5           | 32.5    |
| 252 | SUPROFEN                                                                                             | BRD-A34006693-001-07-1 | -26.4             | 25.6    | -52.8   | 10.2    | 29.2           | 24.0    |
| 253 | SULOCTIDIL                                                                                           | BRD-A34205397-001-03-7 | -91.6             | -90.7   | -94.9   | -94.1   | -98.9          | -101.8  |
| 254 | ZOPICLONE                                                                                            | BRD-A34309505-001-10-1 | 6.2               | 35.7    | 24.9    | 15.5    | 11.7           | 12.8    |
| 255 | 4'-DEMETHYLEPIPODOPHYLLOTOXIN                                                                        | BRD-A34380114-001-03-0 | 24.5              | 21.8    | 8.2     | 9.3     | -17.6          | -1.8    |
| 256 | URSOLIC ACID                                                                                         | BRD-A34492468-001-04-3 | 2.7               | -7.5    | 0.4     | 22.5    | 7.4            | 20.7    |
| 257 | CGP 12177 hydrochloride                                                                              | BRD-A34706053-003-01-9 | -9.1              | -11.1   | 4.6     | -5.1    | 9.9            | 9.7     |
| 258 | HOMOSALATE                                                                                           | BRD-A34751532-001-04-4 | -26.1             | -25.0   | 32.5    | 30.2    | 42.1           | 32.3    |
| 259 | ANABASAMINE HYDROCHLORIDE                                                                            | BRD-A34774643-003-06-3 | -10.8             | 17.0    | 29.6    | 8.5     | -4.1           | 18.1    |
| 260 | DEACETOXY(7)-7-OXOKHIVORINIC ACID                                                                    | BRD-A34842997-001-03-1 | -14.1             | -3.7    | -44.6   | 4.7     | 1.9            | 4.4     |
| 261 | 1,3-DIDEACETYL-7-DEACETOXY-7-OXOKHIVORIN                                                             | BRD-A34891365-001-03-2 | -25.2             | -18.1   | 2.8     | -25.1   | -15.2          | -15.5   |
| 262 | rutin                                                                                                | BRD-A34907681-001-01-7 | 0.2               | -15.6   | 15.5    | 4.8     | -15.5          | -17.8   |
| 263 | PREGNENOLONE                                                                                         | BRD-A35054627-001-05-5 | -9.8              | -9.7    | -0.9    | -5.0    | -4.6           | 0.2     |
| 264 | NECA                                                                                                 | BRD-A35338386-001-04-6 | 6.9               | -1.1    | 5.3     | -2.0    | 19.9           | 18.0    |
| 265 | L-803,087 trifluoroacetate                                                                           | BRD-A35511923-019-01-6 | -25.4             | -27.7   | 11.2    | 18.2    | -36.3          | -56.8   |
| 266 | CGP 37157                                                                                            | BRD-A35623999-001-04-0 | -16.2             | -14.7   | -38.3   | -45.1   | -22.8          | -18.6   |
| 267 | 2-[[[4-(2-Methoxyphenyl)piperazin-1-yl]methyl]-6-methyl-2,3 dihydroimidazo[1,2c]quinazolin-5(6H)-one | BRD-A35871558-001-01-4 | -4.4              | 1.6     | -12.6   | 15.0    | 3.0            | -3.0    |
| 268 | PREGNENOLONE SUCCINATE                                                                               | BRD-A35912562-001-01-0 | -0.9              | -2.9    | -35.7   | -52.3   | -27.4          | -32.1   |
| 269 | APOMORPHINE HYDROCHLORIDE                                                                            | BRD-A35931254-003-03-5 | 31.5              | 33.3    | -60.9   | -25.3   | -51.4          | -55.3   |
| 270 | MEGESTROL ACETATE                                                                                    | BRD-A35989968-001-03-4 | -10.2             | 18.0    | -21.2   | -16.9   | -12.3          | -8.0    |
| 271 | AMCINONIDE                                                                                           | BRD-A36010170-001-03-2 | 7.6               | 2.9     | -2.1    | -4.2    | 11.9           | 1.0     |
| 272 | ESTRADIOL BENZOATE                                                                                   | BRD-A36066264-001-03-1 | -41.6             | -8.0    | -68.1   | -65.5   | -41.0          | -42.6   |
| 273 | Remacemide hydrochloride                                                                             | BRD-A36074203-003-03-5 | -14.3             | -9.0    | -42.2   | -54.1   | -19.3          | -4.5    |

| no. | Compound<br>Name                | Broad Institute ID     | Normalized scores |         |         |         |                |         |
|-----|---------------------------------|------------------------|-------------------|---------|---------|---------|----------------|---------|
|     |                                 |                        | HPr+ DNA          |         | CBA     |         | Amplex Red_HRP |         |
|     |                                 |                        | Plate 1           | Plate 2 | Plate 1 | Plate 2 | Plate 1        | Plate 2 |
| 274 | SULFINPYRAZONE                  | BRD-A36217750-001-09-8 | -34.3             | -12.6   | -12.2   | 0.0     | 4.9            | 3.1     |
| 275 | NYLIDRIN HYDROCHLORIDE          | BRD-A36267905-003-12-7 | 17.8              | 6.9     | 5.6     | 8.2     | -10.2          | -14.1   |
| 276 | CEFUROXIME AXETIL               | BRD-A36322567-001-01-6 | 8.6               | 4.0     | -14.1   | 20.9    | 9.4            | 24.8    |
| 277 | BIOTIN                          | BRD-A36603537-001-07-3 | -10.2             | 5.0     | 13.8    | -6.0    | 3.6            | 2.5     |
| 278 | GLYCOCHOLIC ACID                | BRD-A36636859-001-01-6 | 14.2              | -14.5   | -27.2   | -24.9   | 15.1           | 13.0    |
| 279 | GAMBOGIC ACID                   | BRD-A37011749-001-03-1 | -85.4             | -84.1   | -101.2  | -96.4   | -87.2          | -88.4   |
| 280 | BRL 52537 hydrochloride         | BRD-A37347161-003-01-8 | 21.0              | 22.8    | 18.1    | 27.0    | -21.3          | -17.0   |
| 281 | TULOBUTEROL                     | BRD-A37441042-003-03-0 | 13.1              | -9.2    | 24.4    | 22.7    | 17.8           | 13.2    |
| 282 | Naloxone hydrochloride          | BRD-A37541666-003-01-6 | 3.9               | -4.0    | 2.2     | 1.4     | -8.1           | -2.7    |
| 283 | SB 203580 hydrochloride         | BRD-A37704979-003-01-2 | -9.9              | -20.4   | -6.8    | -8.7    | 5.7            | -3.1    |
| 284 | ICI 204,448 hydrochloride       | BRD-A37776212-003-02-5 | 25.4              | 4.1     | 28.6    | 39.9    | 14.5           | 18.2    |
| 285 | TRIAMCINOLONE                   | BRD-A37780065-001-03-7 | 12.9              | -2.6    | 28.8    | 38.0    | 15.5           | 16.3    |
| 286 | ANTHOTHECOL                     | BRD-A37828317-001-03-0 | -23.7             | -6.4    | -46.3   | -62.1   | -33.3          | -31.1   |
| 287 | ESTRONE                         | BRD-A37959677-001-03-7 | 24.6              | 10.5    | -8.3    | -3.7    | -12.4          | 1.0     |
| 288 | KETOCONAZOLE                    | BRD-A38350138-001-03-1 | -48.8             | -24.2   | -80.4   | -81.2   | -63.6          | -70.2   |
| 289 | CYCLOTHIAZIDE                   | BRD-A38675539-001-05-1 | -7.0              | 2.4     | -23.7   | 11.2    | 23.2           | 19.9    |
| 290 | KU14R                           | BRD-A38747044-001-01-5 | 13.9              | -5.8    | 5.9     | 19.3    | 30.8           | 24.2    |
| 291 | FLUDROCORTISONE ACETATE         | BRD-A38749782-001-03-3 | 0.1               | -15.1   | -1.8    | -9.8    | 4.2            | 1.0     |
| 292 | GW 311616 hydrochloride         | BRD-A38898897-003-01-0 | -2.2              | -4.2    | 2.6     | -1.3    | 8.6            | 22.7    |
| 293 | METHOXAMINE HYDROCHLORIDE       | BRD-A39189014-003-14-4 | 2.0               | -9.8    | 10.3    | -7.7    | 9.1            | 5.4     |
| 294 | RABEPRAZOLE SODIUM              | BRD-A39390670-236-04-0 | 295.6             | 314.3   | 76.7    | 89.4    | 32.0           | 30.0    |
| 295 | NORETHINDRONE                   | BRD-A39415247-001-06-2 | 24.7              | 11.3    | -1.7    | 15.9    | 2.1            | -10.2   |
| 296 | OMDM-2                          | BRD-A39522003-001-01-0 | 20.0              | 2.0     | 7.8     | 11.5    | 36.2           | 20.9    |
| 297 | DEOXYKHIVORIN                   | BRD-A39660642-001-03-1 | 5.2               | -3.3    | -15.2   | -13.8   | -6.4           | -8.9    |
| 298 | ESTRADIOL VALERATE              | BRD-A39747742-001-03-5 | -47.6             | 0.1     | -39.3   | -51.7   | 0.2            | 10.7    |
| 299 | HYDROXYPROGESTERONE             | BRD-A39791822-001-04-4 | 4.2               | 3.9     | -22.3   | -13.4   | -6.9           | -12.2   |
| 300 | Eplerenone                      | BRD-A39969961-001-01-3 | -2.1              | -5.5    | -4.3    | -10.2   | 2.3            | 6.4     |
| 301 | GITOXIGENIN DIACETATE           | BRD-A40022950-001-03-7 | -14.2             | -24.9   | -41.0   | -13.2   | 9.9            | 6.3     |
| 302 | DICHLORISONE ACETATE            | BRD-A40195998-001-01-9 | -11.5             | -16.9   | -35.0   | 19.3    | 15.4           | 17.0    |
| 303 | CARAPIN                         | BRD-A40253167-001-03-7 | 14.4              | -0.7    | -36.7   | -18.0   | 4.2            | -10.8   |
| 304 | 7-DESACETOXY-6,7-DEHYDROGEDUNIN | BRD-A40431293-001-01-0 | -19.7             | -22.4   | -32.7   | -20.4   | -23.9          | -20.8   |
| 305 | KETOROLAC TROMETHAMINE          | BRD-A40639672-234-09-9 | 13.9              | 11.0    | 24.0    | 17.5    | 18.5           | 16.4    |
| 306 | GEMIFLOXACIN MESYLATE           | BRD-A40787240-066-03-8 | 22.6              | 4.1     | 22.9    | 11.4    | 26.2           | 23.8    |
| 307 | PK 11195                        | BRD-A41451487-001-04-7 | -23.0             | 4.8     | -63.1   | -52.4   | -33.1          | -26.6   |
| 308 | Naloxone benzoylhydrazone       | BRD-A41833852-001-01-9 | 12.6              | -13.6   | 9.7     | 11.4    | 8.9            | 0.8     |
| 309 | ENTANDROPHRAGMIN                | BRD-A41916216-001-03-9 | 17.5              | 28.8    | -3.3    | 9.2     | 12.6           | -0.2    |
| 310 | BRUCINE                         | BRD-A41995253-001-03-7 | 5.3               | -3.2    | -2.5    | -9.2    | 2.3            | -0.5    |
| 311 | L-152,804                       | BRD-A42553870-001-05-1 | 38.5              | 42.9    | 26.0    | 18.3    | 4.4            | 4.4     |
| 312 | CETIRIZINE HYDROCHLORIDE        | BRD-A42571354-300-07-0 | 20.7              | 17.1    | 21.8    | 13.8    | 2.3            | 4.5     |
| 313 | IOPANIC ACID                    | BRD-A42628519-001-07-4 | -11.2             | 2.5     | -43.6   | -49.9   | -15.8          | -18.3   |
| 314 | API-2                           | BRD-A42649439-001-02-8 | -11.6             | -7.4    | 11.9    | 7.4     | -8.9           | -5.1    |
| 315 | MELENGESTROL ACETATE            | BRD-A42746051-001-01-1 | -21.1             | -9.4    | -26.9   | -38.5   | -36.3          | -31.9   |
| 316 | ORNIDAZOLE                      | BRD-A42759514-001-09-8 | 13.1              | 6.9     | 12.7    | 3.8     | 9.9            | 2.2     |
| 317 | DEHYDROABIETAMIDE               | BRD-A42929532-001-03-8 | 21.8              | -10.1   | -65.5   | -57.9   | -12.2          | -33.9   |
| 318 | Cantharidin                     | BRD-A43076080-001-03-3 | -6.2              | -6.1    | 29.7    | 23.6    | 2.7            | -3.4    |
| 319 | PINACIDIL                       | BRD-A43882281-001-11-4 | 10.3              | 3.9     | -2.6    | -0.2    | -0.2           | 9.7     |



| no. | Compound<br>Name                       | Broad Institute ID     | Normalized scores |         |         |         |                |         |
|-----|----------------------------------------|------------------------|-------------------|---------|---------|---------|----------------|---------|
|     |                                        |                        | HPr+ DNA          |         | CBA     |         | Amplex Red_HRP |         |
|     |                                        |                        | Plate 1           | Plate 2 | Plate 1 | Plate 2 | Plate 1        | Plate 2 |
| 320 | L 368899 hydrochloride                 | BRD-A43930669-003-01-0 | 9.1               | 2.4     | 3.4     | -9.0    | 8.4            | 12.7    |
| 321 | TETRAHYDROPALMATINE                    | BRD-A43940795-001-03-6 | -5.8              | -2.3    | 11.9    | 5.7     | -1.4           | -2.1    |
| 322 | Reboxetine mesylate                    | BRD-A43974499-066-01-1 | -2.0              | -8.6    | -32.8   | -45.1   | -27.3          | -20.3   |
| 323 | TRANLYCYPROMINE SULFATE                | BRD-A43974575-065-04-4 | -4.1              | -2.5    | 23.1    | 34.1    | 4.9            | 14.9    |
| 324 | HOMATROPINE METHYLBROMIDE              | BRD-A43999749-004-03-3 | -19.4             | -6.1    | 12.5    | 1.7     | 10.7           | 6.8     |
| 325 | DOXYLAMINE SUCCINATE                   | BRD-A44008656-036-15-9 | -16.5             | -14.1   | 15.4    | 11.0    | -0.7           | 5.6     |
| 326 | INDOPROFEN                             | BRD-A44090213-001-15-7 | -4.5              | -16.4   | -1.4    | 6.0     | 10.8           | 3.6     |
| 327 | Dihydroergocristine mesylate           | BRD-A44701612-066-01-9 | 9.6               | 13.4    | -3.1    | -30.9   | -16.8          | -23.8   |
| 328 | Mifepristone                           | BRD-A44780397-001-01-1 | -25.6             | -32.3   | -5.9    | -4.3    | -26.6          | -17.7   |
| 329 | PROGLUMIDE                             | BRD-A44863528-001-08-2 | 23.1              | 4.9     | 4.1     | 18.2    | 28.4           | 11.3    |
| 330 | BOLDINE                                | BRD-A44966919-001-09-8 | 9.3               | 20.7    | -15.1   | 42.9    | -13.8          | -15.4   |
| 331 | METHYLPREDNISOLONE SODIUM SUCCINATE    | BRD-A45044890-236-01-5 | 9.6               | -3.1    | 18.5    | -6.2    | 6.2            | 9.8     |
| 332 | UBP 302                                | BRD-A45499626-001-02-8 | -7.7              | 5.0     | 0.7     | 0.7     | 4.3            | 9.2     |
| 333 | QUINACRINE HYDROCHLORIDE               | BRD-A45889380-300-04-8 | 10.4              | 4.2     | -43.0   | -39.7   | -27.6          | -13.5   |
| 334 | CLIDINIUM BROMIDE                      | BRD-A46066006-004-15-0 | 11.3              | 20.8    | 8.8     | 21.6    | 31.9           | 25.2    |
| 335 | HYDROCORTISONE PHOSPHATE TRIETHYLAMINE | BRD-A46186775-369-01-2 | -14.9             | -21.1   | 1.3     | 14.6    | -0.2           | 6.7     |
| 336 | TETRAMIZOLE HYDROCHLORIDE              | BRD-A46393198-003-10-9 | 9.5               | 10.1    | 13.7    | 9.8     | 5.1            | 5.8     |
| 337 | DEOXYSAAPPANONE B 7,4'-DIMETHYL ETHER  | BRD-A46460777-001-03-4 | 29.3              | 8.6     | 10.1    | -7.6    | -68.3          | -67.7   |
| 338 | PROSCILLARIDIN                         | BRD-A46600320-001-01-1 | -0.8              | 9.6     | 14.9    | 11.7    | -0.8           | 7.3     |
| 339 | Colchicine                             | BRD-A46684810-001-04-6 | 2.5               | 10.9    | 10.6    | 9.3     | 0.8            | 5.9     |
| 340 | Ouabain                                | BRD-A46747628-001-01-9 | -14.5             | -6.2    | 8.9     | 31.1    | 21.1           | 13.6    |
| 341 | CRUSTECDYSONE                          | BRD-A46778020-001-03-4 | 15.4              | 9.6     | -50.0   | 21.1    | 12.4           | 13.4    |
| 342 | LEVOBUNOLOL HYDROCHLORIDE              | BRD-A46876182-003-01-0 | 12.0              | 21.4    | -9.2    | 5.1     | 4.1            | 13.9    |
| 343 | Citalopram hydrobromide                | BRD-A47598013-004-06-1 | -4.0              | 4.6     | -16.5   | -23.9   | -14.4          | -22.3   |
| 344 | NPC 15199                              | BRD-A47633927-001-01-8 | -17.1             | -11.7   | 12.2    | 4.1     | 11.4           | 14.3    |
| 345 | 8-Hydroxy-DPAT hydrobromide            | BRD-A48015106-004-03-0 | 4.4               | 26.6    | 24.8    | 46.8    | 4.7            | 14.1    |
| 346 | TRIHENXYPHENIDYL HYDROCHLORIDE         | BRD-A48180038-003-15-1 | -1.3              | 1.5     | -17.8   | 29.8    | 16.1           | -2.3    |
| 347 | MITOMYCIN C                            | BRD-A48237631-001-03-0 | 26.3              | 16.1    | -1.7    | 4.5     | 10.9           | 19.8    |
| 348 | PHCCC                                  | BRD-A48257147-001-01-9 | -17.6             | 15.8    | -43.0   | -49.3   | -4.9           | -2.8    |
| 349 | AJMALINE                               | BRD-A48300215-001-03-0 | 3.6               | 7.5     | 30.5    | 34.5    | 7.0            | 2.2     |
| 350 | SALSOLINE                              | BRD-A48323445-001-03-4 | 14.3              | 8.1     | 20.8    | -4.5    | -29.8          | -31.9   |
| 351 | GEDUNIN                                | BRD-A48397526-001-03-0 | -11.5             | -11.8   | -62.2   | -15.2   | -17.7          | -23.7   |
| 352 | PIOGLITAZONE HYDROCHLORIDE             | BRD-A48430263-003-06-5 | -5.3              | -7.0    | -22.3   | -14.4   | 7.8            | 8.0     |
| 353 | IVERMECTIN                             | BRD-A48570745-001-01-1 | -2.0              | 6.3     | -25.7   | -29.1   | -29.1          | -27.7   |
| 354 | TESTOSTERONE PROPIONATE                | BRD-A48720949-001-03-2 | -9.6              | 6.1     | 5.1     | 16.2    | -15.4          | -8.8    |
| 355 | METHACYCLINE HYDROCHLORIDE             | BRD-A49035384-003-12-3 | 82.4              | 67.9    | 32.2    | 12.4    | -12.2          | -4.0    |
| 356 | SKF 89976A hydrochloride               | BRD-A49046702-003-03-4 | -9.4              | -3.2    | -7.3    | 2.2     | -8.0           | 0.4     |
| 357 | Galanthamine hydrobromide              | BRD-A49148672-004-01-6 | -11.5             | -3.1    | 21.0    | 4.8     | 2.3            | 3.2     |
| 358 | DONEPEZIL HYDROCHLORIDE                | BRD-A49160188-003-04-4 | 2.6               | -6.5    | 19.7    | -5.0    | 17.1           | 20.7    |
| 359 | Lansoprazole                           | BRD-A49172652-001-13-1 | -7.2              | -1.5    | -12.1   | -3.9    | 6.2            | 11.2    |
| 360 | TRIMEPRAZINE TARTRATE                  | BRD-A49225603-045-05-0 | -64.4             | -48.1   | -67.0   | -67.4   | -82.4          | -87.3   |
| 361 | KHAYANTHONE                            | BRD-A49243397-001-03-1 | 13.2              | 7.6     | -39.9   | -14.0   | -12.1          | -15.6   |
| 362 | Ro 60-0175                             | BRD-A49370193-051-01-7 | -43.3             | -39.5   | -62.3   | -70.3   | -51.3          | -47.8   |
| 363 | DESOXYMETASONE                         | BRD-A49447682-001-01-6 | -10.8             | -13.0   | -13.8   | -15.7   | 4.5            | 9.4     |
| 364 | (?)-AC 7954 hydrochloride              | BRD-A49544621-003-01-0 | -7.7              | 6.0     | -25.7   | -52.5   | -22.0          | -22.7   |
| 365 | FLURANDRENOLIDE                        | BRD-A49765801-001-03-3 | -11.2             | -14.8   | 2.5     | 0.4     | 2.6            | 8.0     |

| no. | Compound<br>Name                                         | Broad Institute ID     | Normalized scores |         |         |         |                |         |
|-----|----------------------------------------------------------|------------------------|-------------------|---------|---------|---------|----------------|---------|
|     |                                                          |                        | HPr+ DNA          |         | CBA     |         | Amplex Red_HRP |         |
|     |                                                          |                        | Plate 1           | Plate 2 | Plate 1 | Plate 2 | Plate 1        | Plate 2 |
| 366 | clindamycin                                              | BRD-A49912425-001-01-1 | 42.1              | -2.9    | 5.3     | 24.1    | 13.1           | 15.1    |
| 367 | FLUMETHAZONE PIVALATE                                    | BRD-A50064262-001-03-9 | 0.6               | 0.3     | 23.8    | 19.5    | -2.1           | 5.8     |
| 368 | TERBUTALINE HEMISULFATE                                  | BRD-A50157456-065-12-3 | 0.4               | 4.0     | -45.5   | 9.4     | -9.3           | -8.9    |
| 369 | MECLIZINE HYDROCHLORIDE                                  | BRD-A50311610-300-06-2 | 17.7              | 8.8     | 4.1     | 67.9    | 8.0            | 63.1    |
| 370 | FIPRONIL                                                 | BRD-A50675702-001-04-8 | -11.2             | -24.9   | -29.0   | -24.9   | -32.8          | -23.8   |
| 371 | Fenoldopam hydrochloride                                 | BRD-A50684349-003-01-1 | 2.9               | 3.6     | 4.9     | 5.8     | -14.0          | -16.9   |
| 372 | MDL 73005EF hydrochloride                                | BRD-A50764878-003-01-0 | 13.0              | -17.2   | 5.6     | 0.8     | -3.6           | 3.2     |
| 373 | NORGESTREL                                               | BRD-A50928468-001-03-7 | -15.6             | -6.5    | -34.2   | -28.3   | -22.0          | -16.6   |
| 374 | 8-Hydroxy-PIPAT oxalate                                  | BRD-A51381734-034-01-1 | -5.4              | 4.7     | -19.4   | 0.2     | -23.1          | -19.2   |
| 375 | Noscapine hydrochloride                                  | BRD-A51393488-003-01-9 | -14.2             | -12.5   | -3.4    | -21.0   | 6.3            | 14.0    |
| 376 | Yohimbine hydrochloride                                  | BRD-A51410489-003-02-8 | 0.7               | 0.6     | -23.1   | -3.8    | -7.4           | -7.2    |
| 377 | 3 a-[(4-Chlorophenyl)phenylmethoxy]tropane hydrochloride | BRD-A51713165-003-01-8 | -15.9             | -20.7   | -87.0   | -92.8   | -39.1          | -48.1   |
| 378 | Venlafaxine HCl                                          | BRD-A51714012-003-01-1 | 11.3              | 16.9    | 13.3    | 30.0    | 6.0            | 0.4     |
| 379 | ECONAZOLE NITRATE                                        | BRD-A51820102-008-16-4 | -41.5             | -53.8   | -58.6   | -68.7   | -62.1          | -63.1   |
| 380 | BRL 15572 hydrochloride                                  | BRD-A51829654-003-02-8 | -6.2              | -4.4    | 4.2     | 16.6    | 28.7           | 30.4    |
| 381 | ICI-185,282                                              | BRD-A51929314-001-01-4 | 14.1              | 9.0     | -26.0   | -23.3   | -8.6           | -9.1    |
| 382 |                                                          | BRD-A52530684-003-01-7 | -3.5              | 1.9     | 27.3    | 25.5    | -5.4           | -3.9    |
| 383 | SKF 83566 hydrobromide                                   | BRD-A52588987-004-04-1 | -5.8              | 11.0    | -16.4   | -9.4    | -12.3          | -16.9   |
| 384 | Tetrindole mesylate                                      | BRD-A52660433-066-01-3 | -90.3             | -92.9   | 25.8    | 40.1    | -64.2          | -68.3   |
| 385 | CHRYSANTHEMIC ACID                                       | BRD-A52893269-001-03-2 | 1.8               | -17.1   | 6.3     | -16.9   | 8.5            | 14.9    |
| 386 | Tianeptine                                               | BRD-A53077924-236-01-4 | 20.3              | -16.1   | 34.9    | 40.3    | 22.1           | 3.4     |
| 387 | EPITESTOSTERONE                                          | BRD-A53131506-001-01-3 | -0.6              | 3.3     | -3.8    | -20.6   | 0.4            | 5.7     |
| 388 | METHYLPREDNISOLONE                                       | BRD-A53176877-001-03-5 | 10.2              | 45.7    | 17.3    | 14.8    | -10.9          | -11.6   |
| 389 | AMIPRILOSE                                               | BRD-A53484347-003-03-1 | 4.9               | -6.7    | 6.4     | 5.1     | 2.1            | 12.3    |
| 390 | PIPENZOLATE BROMIDE                                      | BRD-A53561827-004-15-7 | 12.7              | 14.3    | -7.1    | 28.1    | -1.2           | 3.6     |
| 391 | ORPHENADRINE CITRATE                                     | BRD-A53576514-048-06-9 | 5.0               | -16.7   | -25.1   | -5.3    | -4.9           | 3.7     |
| 392 | PRILOCAINE HYDROCHLORIDE                                 | BRD-A53952395-003-15-2 | -9.0              | -8.4    | -20.1   | 1.4     | 3.1            | 20.6    |
| 393 | RACEPHEDRINE HYDROCHLORIDE                               | BRD-A54236247-003-03-5 | -5.2              | -6.7    | 10.6    | 22.3    | 10.8           | 5.7     |
| 394 | CORTISONE ACETATE                                        | BRD-A54487287-001-03-9 | -14.1             | -2.0    | 26.8    | 30.4    | 24.1           | 15.1    |
| 395 | Pirlindole mesylate                                      | BRD-A54490543-066-04-4 | -53.9             | -44.2   | -48.8   | -62.2   | -50.2          | -51.8   |
| 396 | SOLIFENACIN SUCCINATE                                    | BRD-A54596827-036-01-4 | -37.8             | 4.2     | -18.5   | -23.2   | -17.6          | -21.3   |
| 397 | Dihydroergotamine mesylate                               | BRD-A54845972-066-01-5 | -1.9              | -8.3    | -11.3   | -7.1    | -8.6           | -13.1   |
| 398 | ETOMIDATE                                                | BRD-A54880345-001-11-8 | -11.3             | -6.9    | -11.1   | 2.9     | -2.4           | 4.6     |
| 399 | (RS)-(?) -Sulpiride                                      | BRD-A55272860-001-08-8 | -6.5              | 12.6    | 5.5     | 8.0     | 20.0           | 7.0     |
| 400 | STROPHANTHIDIN                                           | BRD-A55312468-001-03-9 | -21.2             | -3.5    | -32.1   | 19.6    | 29.1           | 5.6     |
| 401 | CGP 54626 hydrochloride                                  | BRD-A55369275-003-01-2 | -8.1              | -7.6    | 7.8     | 0.1     | 22.2           | 19.4    |
| 402 | TESTOSTERONE                                             | BRD-A55393291-001-05-7 | -18.3             | 0.8     | -18.5   | 11.0    | 0.3            | 11.5    |
| 403 | COLFORSIN                                                | BRD-A55416093-001-03-1 | 3.8               | 4.4     | 4.6     | -13.1   | 9.2            | 9.0     |
| 404 | Methotrexate                                             | BRD-A55424491-001-08-2 | -22.3             | 4.5     | 23.6    | 25.0    | 13.2           | 10.8    |
| 405 | BNTX maleate                                             | BRD-A55484088-050-01-7 | -23.6             | -27.8   | 28.6    | 33.9    | -35.6          | -42.2   |
| 406 | CYTISINE                                                 | BRD-A55579717-001-03-2 | 11.1              | -1.5    | -27.2   | -11.5   | 3.8            | 2.1     |
| 407 | H-7 dihydrochloride                                      | BRD-A55756846-300-01-0 | -22.3             | -10.8   | 20.6    | -27.2   | 7.6            | -1.8    |
| 408 | PRIMAQUINE DIPHOSPHATE                                   | BRD-A55913614-316-06-2 | -12.6             | 7.6     | -36.9   | -48.9   | -29.5          | -24.1   |
| 409 | OMEPRAZOLE                                               | BRD-A55962179-001-08-0 | -20.7             | 35.2    | -0.4    | 2.6     | -12.2          | -1.6    |
| 410 | ZILEUTON                                                 | BRD-A56359832-001-04-6 | -2.0              | 5.6     | 14.8    | 9.3     | -12.4          | -13.3   |
| 411 | ALTHIAZIDE                                               | BRD-A56675431-001-07-3 | 5.8               | 18.0    | 20.4    | 26.3    | 9.3            | 21.6    |

| no. | Compound<br>Name                      | Broad Institute ID     | Normalized scores |         |         |         |                |         |
|-----|---------------------------------------|------------------------|-------------------|---------|---------|---------|----------------|---------|
|     |                                       |                        | HPr+ DNA          |         | CBA     |         | Amplex Red_HRP |         |
|     |                                       |                        | Plate 1           | Plate 2 | Plate 1 | Plate 2 | Plate 1        | Plate 2 |
| 412 | 11a-ACETOXYPROGESTERONE               | BRD-A56884981-001-02-6 | 4.6               | 11.8    | -5.6    | -2.2    | 13.7           | 26.7    |
| 413 | SQ 22536                              | BRD-A56987319-001-05-3 | 0.4               | -9.5    | -2.0    | -3.7    | 10.9           | 23.5    |
| 414 | PERUVOSIDE                            | BRD-A57089740-001-03-1 | 1.9               | 12.9    | 1.2     | -10.6   | 12.9           | 5.7     |
| 415 | CHLORCYCLIZINE HYDROCHLORIDE          | BRD-A57133233-003-06-0 | 10.9              | 2.5     | -66.7   | -49.1   | -20.1          | -19.9   |
| 416 | PIROXICAM                             | BRD-A57382968-001-18-3 | 41.2              | 64.2    | 27.6    | 25.2    | -7.1           | 4.7     |
| 417 | (-)-Bicuculline methiodide            | BRD-A57798559-005-01-2 | -17.9             | -3.3    | -15.8   | -3.5    | 15.2           | 10.2    |
| 418 | NIMODIPINE                            | BRD-A58048407-001-09-7 | -12.5             | -8.1    | -10.1   | -20.2   | -8.9           | -4.5    |
| 419 | OXYPHENCYCLIMINE HYDROCHLORIDE        | BRD-A58193911-003-12-0 | -9.6              | -23.6   | -28.5   | 16.2    | 1.2            | 0.1     |
| 420 | SELAMECTIN                            | BRD-A58564983-001-03-8 | -5.0              | 4.4     | 13.6    | 19.6    | 22.5           | 22.3    |
| 421 | N-ACETYLPROLINE                       | BRD-A58587171-001-04-9 | -19.4             | -5.7    | 2.0     | 17.5    | -0.4           | 1.1     |
| 422 | RITODRINE HYDROCHLORIDE               | BRD-A59174698-003-12-8 | 1.9               | 10.2    | 16.4    | 6.2     | 4.0            | -6.4    |
| 423 | 7-Hydroxy-PIPAT maleate               | BRD-A59391763-103-01-9 | -10.7             | -11.3   | 5.5     | 21.8    | 4.1            | 8.9     |
| 424 | DEXPANTHENOL                          | BRD-A59413292-001-04-1 | -10.7             | -1.3    | 2.8     | 10.0    | 12.7           | 12.5    |
| 425 | 12a-HYDROXY-5-DEOXYDEHYDROMUNDUSERONE | BRD-A59471422-001-02-6 | -8.0              | -4.4    | -13.1   | -16.7   | 6.7            | -11.5   |
| 426 | 7-DEACETYLKHIVORIN                    | BRD-A59539786-001-03-8 | 10.5              | 16.3    | 16.8    | 4.1     | 0.5            | -6.8    |
| 427 | AMYGDALIN                             | BRD-A59552297-001-03-3 | -0.8              | 1.2     | 34.9    | 18.8    | 9.8            | 11.8    |
| 428 | 3-NOR-3-OXOPANASINSAN-6-OL            | BRD-A59682351-001-03-1 | 23.4              | -1.1    | -22.6   | 8.3     | 5.6            | 7.9     |
| 429 | Fluticasone propionate                | BRD-A59943784-001-01-8 | -23.8             | -13.3   | -9.5    | -1.6    | 12.5           | -2.1    |
| 430 | Amisulpride                           | BRD-A60197193-001-05-4 | 8.3               | -14.3   | 15.0    | 4.0     | 8.6            | 7.3     |
| 431 | BUDESONIDE                            | BRD-A60571864-001-03-3 | -1.7              | 2.4     | -11.1   | -19.2   | -8.3           | -10.7   |
| 432 | CAFESTOL                              | BRD-A60717068-001-01-0 | -22.2             | -21.1   | -42.0   | -30.7   | -24.8          | -25.0   |
| 433 | 2 <sup>+</sup> -MeCCPA                | BRD-A60877539-001-01-3 | -2.5              | 8.2     | 30.7    | 15.0    | 36.1           | 30.2    |
| 434 | GLICLAZIDE                            | BRD-A61154809-001-08-4 | -14.8             | -48.2   | 18.6    | -5.2    | 7.0            | 14.3    |
| 435 | Eliprodil                             | BRD-A61392169-001-01-9 | 25.1              | 13.1    | -18.3   | -11.8   | -6.5           | -14.1   |
| 436 | METOLAZONE                            | BRD-A61793559-001-08-1 | -3.3              | 2.3     | -4.5    | 7.3     | 6.0            | 11.4    |
| 437 | WAY 161503 hydrochloride              | BRD-A62021152-003-01-8 | -3.9              | -3.9    | -6.6    | 11.1    | 1.4            | -8.8    |
| 438 | MDL 11,939                            | BRD-A62057054-001-01-5 | -16.6             | -8.9    | 6.3     | -12.6   | 20.1           | 17.2    |
| 439 | TOTAROL                               | BRD-A62129005-001-03-8 | 17.3              | 4.4     | 85.4    | -14.0   | -25.3          | -20.6   |
| 440 | Cycloheximide                         | BRD-A62184259-001-02-8 | -0.1              | 4.5     | -2.1    | -17.0   | 11.7           | 13.3    |
| 441 | ZM 226600                             | BRD-A62209527-001-03-7 | -33.2             | -21.6   | -8.5    | 0.8     | -9.7           | -8.5    |
| 442 | EDOXUDINE                             | BRD-A62505706-001-03-1 | -1.5              | 17.3    | 6.9     | -4.9    | -0.5           | -2.5    |
| 443 | PREDNISONONE                          | BRD-A62525898-001-04-5 | 8.0               | 3.6     | 18.3    | -2.9    | 10.7           | 12.7    |
| 444 | CORTISONE                             | BRD-A62731508-001-04-1 | 16.0              | -1.3    | 3.6     | 25.7    | 23.6           | 18.0    |
| 445 | RIFAXIMIN                             | BRD-A62879835-001-03-4 | 37.0              | 39.6    | -26.4   | 8.2     | -46.8          | -47.2   |
| 446 | Cabergoline                           | BRD-A63043573-001-01-6 | -10.4             | -12.0   | 11.5    | 7.7     | 18.7           | 22.9    |
| 447 | Rimcazole dihydrochloride             | BRD-A63346720-300-01-1 | -36.3             | -35.9   | -91.9   | -95.0   | -81.1          | -84.4   |
| 448 | EPIESTRIOL                            | BRD-A63433173-001-01-3 | -4.5              | 13.6    | -42.4   | 1.0     | 9.9            | 15.2    |
| 449 | Ro 04-5595                            | BRD-A63546914-003-01-2 | -17.9             | -18.8   | -54.4   | -63.4   | -43.8          | -48.4   |
| 450 | Methylergometrine maleate             | BRD-A63667919-103-01-9 | 34.3              | 33.9    | 68.2    | 82.3    | 4.5            | 3.9     |
| 451 | PD 123319 ditrifluoroacetate          | BRD-A63836183-362-01-1 | -25.3             | -18.8   | 11.0    | -1.0    | 21.0           | 21.7    |
| 452 | N-BENZYL TROPAN-4-OL                  | BRD-A64068566-001-01-1 | -2.7              | 33.4    | -12.7   | 6.7     | 16.7           | 3.7     |
| 453 | MEXILETINE HYDROCHLORIDE              | BRD-A64092382-003-09-2 | -33.9             | -1.7    | 0.5     | 15.3    | 16.4           | 7.2     |
| 454 | SODIUM DEHYDROCHOLATE                 | BRD-A64125466-236-03-8 | -12.0             | -4.6    | 10.1    | -9.2    | 8.5            | 21.3    |
| 455 | SKF 77434 hydrobromide                | BRD-A64227845-004-02-8 | 9.5               | 11.2    | -19.7   | -25.7   | -25.1          | -29.7   |
| 456 | (-)-Terreic acid                      | BRD-A64228451-001-04-3 | 95.0              | 79.6    | 10.6    | 18.5    | -5.3           | -3.1    |
| 457 | LANATOSIDE C                          | BRD-A64242993-001-03-1 | 29.5              | 30.8    | 21.8    | 11.1    | 33.6           | 30.9    |

| no. | Compound<br>Name                      | Broad Institute ID     | Normalized scores |         |         |         |                |         |
|-----|---------------------------------------|------------------------|-------------------|---------|---------|---------|----------------|---------|
|     |                                       |                        | HPr+ DNA          |         | CBA     |         | Amplex Red_HRP |         |
|     |                                       |                        | Plate 1           | Plate 2 | Plate 1 | Plate 2 | Plate 1        | Plate 2 |
| 458 | JOSAMYCIN                             | BRD-A64243931-001-01-8 | -2.4              | 9.4     | 18.1    | -4.4    | 3.6            | 21.9    |
| 459 | Cyclosporin A                         | BRD-A64290322-001-01-6 | -18.6             | -10.0   | -27.3   | -15.4   | -16.1          | -22.5   |
| 460 | MEXICANOLIDE                          | BRD-A64523751-001-03-6 | 3.6               | 2.6     | 20.7    | -1.9    | 2.5            | 3.5     |
| 461 | CV 1808                               | BRD-A64933752-001-01-0 | -8.9              | -5.9    | 25.9    | 38.9    | 18.7           | 26.5    |
| 462 | Mirtazepine                           | BRD-A64977602-001-04-3 | 0.2               | -4.1    | 10.6    | 4.2     | 16.7           | 8.0     |
| 463 | OXYBUTYNIN CHLORIDE                   | BRD-A65013509-003-13-7 | -15.0             | -8.3    | 0.0     | -27.6   | -17.7          | -5.3    |
| 464 | DIHYDROERGOCRISTINE                   | BRD-A65076780-001-02-1 | 13.2              | -10.6   | 32.8    | 13.9    | -31.9          | -28.2   |
| 465 | ATPA                                  | BRD-A65145453-001-02-0 | -14.1             | -10.8   | 11.3    | 18.4    | 17.5           | 27.1    |
| 466 | LOBELINE HYDROCHLORIDE                | BRD-A65243462-003-03-6 | -11.0             | -4.3    | -8.4    | 9.1     | 10.1           | 4.2     |
| 467 | Cimaterol                             | BRD-A65440446-001-03-3 | -15.0             | -10.8   | 0.8     | 15.9    | 5.3            | 22.4    |
| 468 | FLUNISOLIDE                           | BRD-A65449987-001-06-2 | -18.3             | -13.9   | -3.4    | 9.8     | 1.0            | 1.2     |
| 469 | ginsenoside-Rc                        | BRD-A65550283-001-01-9 | 3.8               | -2.3    | 12.0    | 4.8     | 7.5            | 9.5     |
| 470 | RX 821002 hydrochloride               | BRD-A65597028-003-02-4 | -6.3              | -7.5    | -5.3    | -5.9    | -5.6           | 2.5     |
| 471 | Zacopride hydrochloride               | BRD-A65615053-003-01-4 | -10.2             | -1.3    | 10.9    | 22.7    | 13.7           | 16.3    |
| 472 | CANDESARTAN CILEXIL                   | BRD-A65671304-001-03-4 | -63.7             | -70.0   | 16.3    | 2.1     | -78.1          | -78.8   |
| 473 | HYDROCORTISONE ACETATE                | BRD-A65767837-001-03-6 | -5.6              | -0.5    | -11.7   | -2.2    | 5.1            | -3.8    |
| 474 | (S)-WAY 100135 dihydrochloride        | BRD-A66369147-300-01-5 | 11.1              | -20.0   | 12.1    | 13.7    | 11.8           | 15.1    |
| 475 | HTMT dimaleate                        | BRD-A66435872-313-01-8 | -15.4             | -20.6   | -19.6   | 5.0     | -5.8           | 2.4     |
| 476 | ACETYLPHENYLALANINE                   | BRD-A66443329-001-05-3 | 9.3               | 45.5    | -6.2    | 5.9     | -1.8           | -8.5    |
| 477 | OXACILLIN SODIUM                      | BRD-A66481418-236-03-2 | 15.7              | 0.6     | 13.1    | 22.0    | 12.1           | 23.6    |
| 478 | DIGOXIGENIN                           | BRD-A66491790-001-01-1 | 12.3              | 14.1    | 11.7    | -12.3   | 20.6           | 12.6    |
| 479 | NALTREXONE HYDROCHLORIDE              | BRD-A66559694-001-03-8 | 17.5              | 10.3    | -15.2   | -2.6    | -14.0          | -13.1   |
| 480 | Medetomidine hydrochloride            | BRD-A66563878-003-01-8 | -8.0              | -7.4    | -9.6    | -7.9    | -1.7           | -6.6    |
| 481 | BETAMETHASONE 17,21-DIPROPIONATE      | BRD-A66861218-001-03-5 | -38.9             | -12.9   | 4.3     | 13.6    | -9.0           | 6.5     |
| 482 | DIFLORASONE DIACETATE                 | BRD-A66869276-001-01-1 | -23.3             | -28.5   | 15.0    | -14.9   | -3.4           | -7.8    |
| 483 | NORCANTHARIDIN                        | BRD-A66914119-001-04-0 | 11.6              | -0.4    | -2.8    | -13.5   | 12.1           | 13.7    |
| 484 | Nemonapride                           | BRD-A66927094-001-01-7 | -14.0             | -5.1    | -19.2   | -25.2   | -8.3           | 6.3     |
| 485 | 7-OXOCHOLESTEROL                      | BRD-A67138712-001-03-8 | -24.2             | -14.7   | 0.8     | 21.3    | 0.3            | 9.7     |
| 486 | O-BENZYL-L-SERINE                     | BRD-A67259561-001-02-6 | -8.6              | 20.7    | -11.1   | 18.7    | 11.7           | -3.8    |
| 487 | NCS-382                               | BRD-A67433117-001-01-8 | -10.5             | -4.2    | -2.8    | 2.6     | 4.2            | 7.6     |
| 488 | 4-P-PDOT                              | BRD-A67482312-001-01-8 | -11.2             | 1.3     | -24.9   | -23.4   | 1.4            | 7.1     |
| 489 | 3beta-HYDROXYDEOXODIHYDRODEOXYGEDUNIN | BRD-A67508925-001-03-5 | 5.5               | -12.4   | -52.8   | -39.5   | -18.2          | -22.2   |
| 490 | NAFRONYL OXALATE                      | BRD-A67862938-034-09-9 | -4.9              | 3.0     | -9.8    | -22.4   | 15.7           | 16.1    |
| 491 | BRL 44408 maleate                     | BRD-A67949680-103-01-4 | -8.5              | 26.7    | 32.6    | 19.7    | 12.9           | 19.3    |
| 492 | Daunorubicin hydrochloride            | BRD-A68009927-003-02-9 | -20.2             | -1.9    | -22.4   | -29.0   | -7.2           | -6.3    |
| 493 | BROMPHENIRAMINE MALEATE               | BRD-A68723818-050-18-4 | 1.8               | -33.9   | -35.1   | -27.8   | -9.7           | -10.2   |
| 494 | AZELASTINE HYDROCHLORIDE              | BRD-A68888262-003-07-8 | -14.4             | -26.3   | -58.9   | -50.7   | -64.3          | -66.6   |
| 495 | DAPT                                  | BRD-A68929948-001-01-9 | -3.3              | -4.1    | -8.8    | -20.7   | 1.8            | 8.8     |
| 496 | CEDRELONE                             | BRD-A69143712-001-03-6 | -19.0             | -19.5   | -44.0   | -53.5   | -43.5          | -43.6   |
| 497 | CARBIDOPA                             | BRD-A69512159-001-03-2 | 32.2              | 41.7    | 56.2    | 33.8    | -37.4          | -33.7   |
| 498 | DILTIAZEM HYDROCHLORIDE               | BRD-A69636825-003-03-9 | 25.0              | 15.4    | -44.2   | -55.4   | -11.8          | -6.8    |
| 499 | MINOCYCLINE HYDROCHLORIDE             | BRD-A69651145-003-04-9 | 28.3              | 26.4    | -5.2    | -8.6    | -51.1          | -50.0   |
| 500 | FLUMEQUINE                            | BRD-A69777949-001-15-0 | 11.0              | 17.9    | -25.7   | -7.7    | 8.8            | -6.7    |
| 501 | EUCATROPINE HYDROCHLORIDE             | BRD-A69786436-003-03-3 | 17.9              | 9.3     | 35.1    | 26.7    | 7.5            | 16.1    |
| 502 | CYCLOSPORINE                          | BRD-A69815203-001-05-0 | -2.1              | -41.1   | -20.9   | -20.2   | -6.8           | -2.9    |
| 503 | AMINOPENTAMIDE                        | BRD-A69917777-065-01-4 | -10.6             | -5.6    | -17.5   | 16.8    | 5.8            | 10.2    |

| no. | Compound<br>Name                 | Broad Institute ID     | Normalized scores |         |         |         |                |         |
|-----|----------------------------------|------------------------|-------------------|---------|---------|---------|----------------|---------|
|     |                                  |                        | HPr+ DNA          |         | CBA     |         | Amplex Red_HRP |         |
|     |                                  |                        | Plate 1           | Plate 2 | Plate 1 | Plate 2 | Plate 1        | Plate 2 |
| 504 | Bromocriptine mesylate           | BRD-A69960130-066-01-4 | 15.3              | 19.8    | 35.1    | 16.7    | 24.8           | 26.2    |
| 505 | SECNIDAZOLE                      | BRD-A70083328-001-12-8 | 14.0              | 9.4     | 21.4    | 9.7     | 22.6           | 26.9    |
| 506 | PG-9 maleate                     | BRD-A70268693-103-01-9 | -7.6              | -1.6    | -41.3   | -58.5   | -8.2           | -4.7    |
| 507 | PSB 36                           | BRD-A70407468-001-01-2 | 22.8              | 16.1    | 27.1    | 25.4    | 20.9           | 21.4    |
| 508 | SULCONAZOLE NITRATE              | BRD-A70649075-008-17-5 | -54.8             | -61.6   | -66.6   | -76.1   | -57.5          | -62.6   |
| 509 | 3beta-ACETOXYDEOXODIHYDROGEDUNIN | BRD-A71001587-001-03-4 | -27.5             | -34.3   | 15.1    | 5.2     | -20.0          | -3.4    |
| 510 | FENDILINE HYDROCHLORIDE          | BRD-A71033472-003-15-5 | 9.0               | 9.9     | -58.4   | -50.6   | -33.2          | -35.8   |
| 511 | LUFENURON                        | BRD-A71774530-001-02-6 | 15.3              | 9.0     | -15.7   | 0.1     | 10.7           | 2.2     |
| 512 | PRAVASTATIN SODIUM               | BRD-A71816415-236-03-5 | 20.5              | 15.9    | 0.1     | 10.6    | 3.9            | 4.3     |
| 513 | MUNDULONE ACETATE                | BRD-A71960694-001-01-5 | -3.8              | 0.2     | 28.4    | 35.1    | 5.3            | 8.6     |
| 514 | SR 202                           | BRD-A72066420-001-01-1 | 20.3              | -13.1   | 6.8     | 1.3     | 7.8            | 11.3    |
| 515 | METERGOLINE                      | BRD-A72309220-001-03-3 | -20.9             | -43.0   | -86.3   | -84.0   | -69.1          | -79.5   |
| 516 | Spiroaxtrine                     | BRD-A72483914-001-02-9 | -6.8              | -26.6   | -20.4   | -24.4   | -10.6          | -11.0   |
| 517 | GW 6471                          | BRD-A72596465-001-01-3 | 11.8              | -5.5    | 9.7     | 7.7     | -9.8           | -5.8    |
| 518 | SKF 96365                        | BRD-A72703248-003-03-1 | 0.2               | -14.6   | 0.8     | 23.7    | -10.7          | -10.6   |
| 519 | ASIATIC ACID                     | BRD-A72758037-001-01-8 | -4.5              | 3.7     | -29.2   | -37.1   | -12.6          | -16.6   |
| 520 | FEXOFENADINE HYDROCHLORIDE       | BRD-A73368467-003-07-7 | -35.8             | -13.6   | 13.1    | 1.2     | 10.3           | 11.9    |
| 521 | 8-HYDROXYCARAPINIC ACID          | BRD-A73559168-001-03-6 | 8.8               | -5.4    | -11.8   | -7.0    | -7.3           | 4.8     |
| 522 | EXEMESTANE                       | BRD-A73741725-001-01-0 | 12.6              | -0.9    | 10.8    | 5.0     | 5.3            | 9.2     |
| 523 | Glycodeoxycholic Acid            | BRD-A73859745-236-01-8 | -0.9              | 6.5     | -9.4    | 1.2     | 7.4            | 13.9    |
| 524 | DACTINOMYCIN                     | BRD-A73909368-001-01-5 | -1.8              | 6.8     | 5.2     | 7.3     | -12.8          | -25.7   |
| 525 | TROXERUTIN                       | BRD-A74160776-001-03-6 | 0.9               | 3.6     | -28.6   | -10.4   | -11.2          | 2.9     |
| 526 | ETODOLAC                         | BRD-A74667430-001-15-2 | -26.9             | -51.7   | 0.3     | -10.7   | -4.1           | 1.0     |
| 527 | GATIFLOXACIN                     | BRD-A74980173-001-06-9 | 5.4               | -9.5    | 3.9     | 32.9    | 12.2           | 21.5    |
| 528 | HYDROCORTISONE                   | BRD-A75172220-001-03-2 | 22.0              | 48.2    | 5.5     | -8.7    | 5.9            | 12.7    |
| 529 | DESOXYCORTICOSTERONE ACETATE     | BRD-A75402480-001-03-8 | -23.2             | 6.6     | -41.8   | -51.3   | -17.9          | -19.0   |
| 530 | KAWAIN                           | BRD-A75455249-001-12-9 | -28.2             | -17.4   | -9.0    | -18.9   | 6.0            | 2.8     |
| 531 | PD 166793                        | BRD-A75478957-001-01-6 | -9.8              | -2.7    | 5.6     | 2.6     | 31.8           | 27.4    |
| 532 | ISOXICAM                         | BRD-A75552914-001-09-3 | -9.8              | -5.8    | 7.2     | -3.8    | 6.5            | 6.7     |
| 533 | CLENBUTEROL HYDROCHLORIDE        | BRD-A75726477-003-14-8 | 9.6               | 6.3     | 25.7    | 33.9    | 38.8           | 31.1    |
| 534 | SDM25N hydrochloride             | BRD-A75769826-003-01-3 | -7.3              | -21.0   | 23.2    | 25.5    | -37.7          | -40.2   |
| 535 | LOMEFLOXACIN HYDROCHLORIDE       | BRD-A75850590-003-06-4 | 9.5               | 48.7    | 4.8     | 26.7    | 14.7           | 13.0    |
| 536 | MUROLLADIE-3-ONE                 | BRD-A75954196-001-03-3 | 14.0              | 5.8     | 6.6     | 26.8    | 26.0           | 8.9     |
| 537 | Cromakalim                       | BRD-A76093993-001-01-8 | -3.3              | -1.7    | 3.7     | -2.5    | -13.0          | -3.4    |
| 538 | PANTETHINE                       | BRD-A76244192-001-01-6 | 17.3              | 4.4     | -3.4    | -2.8    | 9.1            | 6.6     |
| 539 | alpha-DIHYDROGEDUNOL             | BRD-A76417540-001-03-3 | 3.2               | 4.5     | -53.0   | -17.3   | 11.2           | 0.2     |
| 540 | RUTOSIDE (rutin)                 | BRD-A76747559-001-02-3 | -13.2             | -22.1   | -40.9   | 2.0     | -34.1          | -35.0   |
| 541 | QUERCITRIN                       | BRD-A76899420-001-03-7 | 34.6              | 18.6    | -27.3   | 2.9     | -37.0          | -40.4   |
| 542 | VESAMICOL HYDROCHLORIDE          | BRD-A76904477-003-05-8 | 14.5              | 9.4     | 0.0     | 37.7    | 14.5           | 12.3    |
| 543 |                                  | BRD-A76941896-001-01-6 | 102.6             | 108.7   | 25.0    | 30.6    | -1.6           | 4.3     |
| 544 | D609                             | BRD-A77118605-237-01-2 | 11.6              | 22.2    | 6.5     | -10.3   | 10.6           | 12.7    |
| 545 | DEOXYSAFFRON B TRIMETHYL ETHER   | BRD-A77164655-001-03-1 | 2.3               | -15.2   | -44.5   | -27.6   | -24.0          | -21.8   |
| 546 | SYM 2206                         | BRD-A77218119-001-02-7 | -7.2              | -2.3    | -57.3   | -61.0   | 8.2            | -0.8    |
| 547 | CYCLOPENTOLATE HYDROCHLORIDE     | BRD-A77291778-003-15-4 | 5.8               | -16.5   | 2.4     | -9.8    | 6.5            | 2.4     |
| 548 | Salubrial                        | BRD-A77299732-001-01-6 | 19.9              | 15.0    | -9.9    | -16.6   | -10.6          | -11.2   |
| 549 | RK-682                           | BRD-A77349281-001-02-2 | -66.5             | -62.9   | 36.1    | 55.0    | -60.8          | -64.1   |

| no. | Compound<br>Name                         | Broad Institute ID     | Normalized scores |         |         |         |                |         |
|-----|------------------------------------------|------------------------|-------------------|---------|---------|---------|----------------|---------|
|     |                                          |                        | HPr+ DNA          |         | CBA     |         | Amplex Red_HRP |         |
|     |                                          |                        | Plate 1           | Plate 2 | Plate 1 | Plate 2 | Plate 1        | Plate 2 |
| 550 | TOTAROL-19-CARBOXYLIC ACID, METHYL ESTER | BRD-A77488069-001-03-4 | -11.6             | -11.5   | -9.1    | 42.1    | 23.5           | 7.6     |
| 551 | FLUOCINOLONE ACETONIDE                   | BRD-A77824596-001-03-2 | -18.9             | -12.9   | -3.7    | -5.1    | -8.6           | 2.9     |
| 552 | HYOSCYAMINE                              | BRD-A78303415-001-03-5 | 13.3              | 18.2    | 23.8    | 15.0    | 19.4           | 11.1    |
| 553 | Monastrol                                | BRD-A78377521-001-03-0 | -18.9             | -5.3    | 16.6    | 20.3    | 11.4           | 20.2    |
| 554 | PREDNISOLONE HEMISUCCINATE               | BRD-A78391468-001-01-0 | -20.6             | -5.9    | -2.7    | 6.8     | 8.6            | 4.4     |
| 555 | ICI-118,551 hydrochloride                | BRD-A78942461-003-01-3 | -13.6             | -16.1   | -38.9   | -26.4   | -20.1          | -24.0   |
| 556 | AGN 192403 hydrochloride                 | BRD-A79038507-003-01-5 | -5.1              | 17.0    | 18.8    | 11.5    | 27.4           | 31.4    |
| 557 | BETAMETHAZONE SODIUM PHOSPHATE           | BRD-A79380603-304-01-6 | -9.7              | 11.1    | 20.2    | 12.6    | 0.5            | 7.7     |
| 558 | TROPICAMIDE                              | BRD-A79672927-001-10-8 | -18.8             | -9.5    | 4.1     | 21.0    | 13.8           | 2.2     |
| 559 | SIROLIMUS                                | BRD-A79768653-001-02-1 | 33.1              | 13.8    | -19.0   | -33.2   | -18.8          | -26.6   |
| 560 | Memantine hydrochloride                  | BRD-A79803969-003-06-2 | -3.7              | -1.2    | 13.9    | 6.4     | 30.5           | 31.3    |
| 561 | MIDODRINE HYDROCHLORIDE                  | BRD-A79981887-003-09-9 | 8.5               | -7.5    | -1.2    | -2.0    | 10.6           | 1.7     |
| 562 | BENDROFLUMETHIAZIDE                      | BRD-A80017228-001-15-8 | -13.3             | 2.4     | 24.2    | 10.9    | 4.4            | 13.2    |
| 563 | NORSTICTIC ACID                          | BRD-A80079592-001-03-2 | 58.6              | 62.5    | -67.2   | -57.9   | -42.3          | -61.8   |
| 564 | BETAMETHASONE VALERATE                   | BRD-A80594172-001-03-8 | 5.9               | 2.5     | -49.2   | -20.5   | -3.0           | -16.0   |
| 565 | FR 139317                                | BRD-A80641450-001-01-4 | 0.8               | -11.1   | 1.5     | -3.0    | 19.7           | 26.0    |
| 566 | CLOPERASTINE HYDROCHLORIDE               | BRD-A80908310-003-08-8 | -1.7              | -12.4   | -61.5   | -43.4   | -20.6          | -32.2   |
| 567 | CONVALLATOXIN                            | BRD-A80968824-001-03-6 | -13.0             | 0.9     | 33.2    | 5.5     | 3.0            | 22.3    |
| 568 | GLYCOPYRROLATE                           | BRD-A81233518-004-07-0 | 4.4               | 3.5     | 9.6     | 2.6     | 14.6           | 9.5     |
| 569 | Simvastatin                              | BRD-A81772229-001-03-2 | 2.1               | -1.6    | -3.8    | -6.6    | 3.1            | 17.0    |
| 570 | U 18666A                                 | BRD-A81795050-003-01-7 | 3.3               | -10.0   | -15.7   | -32.3   | -17.0          | -11.0   |
| 571 | CGS 21680 hydrochloride                  | BRD-A81866333-003-01-5 | 12.6              | -1.6    | -21.4   | -26.8   | -14.0          | -14.7   |
| 572 | 6alpha-METHYLPREDNISOLONE ACETATE        | BRD-A82086877-001-03-1 | -3.3              | -16.1   | 0.2     | -15.3   | -3.0           | -1.0    |
| 573 | Clofarabine                              | BRD-A82371568-001-01-5 | 8.6               | -2.3    | 0.7     | -7.4    | 19.0           | 25.0    |
| 574 | MICONAZOLE NITRATE                       | BRD-A82396632-008-14-2 | -128.3            | -123.4  | -126.2  | -131.1  | -97.9          | -97.9   |
| 575 | MANGIFERIN                               | BRD-A82440780-001-01-0 | 107.7             | 98.2    | -36.1   | -19.7   | -26.2          | -39.2   |
| 576 | ARTENIMOL                                | BRD-A82452087-001-01-5 | -4.3              | -17.9   | -47.0   | -4.3    | -1.4           | 4.7     |
| 577 | SDZ NKT 343                              | BRD-A82590476-001-01-1 | -8.8              | -15.4   | -31.2   | -33.9   | -9.4           | -6.3    |
| 578 | Naltrindole hydrochloride                | BRD-A82656074-003-01-2 | 17.5              | 9.8     | -25.6   | -8.5    | -48.4          | -32.0   |
| 579 | FINASTERIDE                              | BRD-A83081521-001-01-5 | -26.5             | 3.8     | -15.8   | 3.1     | -3.4           | 2.9     |
| 580 | BRAZILIN                                 | BRD-A83326220-001-04-2 | 305.6             | 279.8   | 25.5    | 30.3    | -0.3           | 5.4     |
| 581 | 2-CI-IB-MECA                             | BRD-A83387524-001-01-3 | -41.3             | -34.6   | -59.1   | -86.9   | -42.8          | -37.2   |
| 582 | ESTRADIOL METHYL ETHER                   | BRD-A83613346-001-03-4 | -9.3              | -18.8   | -32.1   | -50.6   | -31.2          | -29.6   |
| 583 | A 61603 hydrobromide                     | BRD-A83650191-004-01-0 | -6.7              | 7.8     | 11.8    | 4.8     | -30.5          | -27.6   |
| 584 | Chromanol 293B                           | BRD-A83695761-001-01-1 | 1.0               | -0.3    | 12.3    | -1.0    | 21.9           | 24.2    |
| 585 | DEXAMETHASONE SODIUM PHOSPHATE           | BRD-A83802939-304-03-4 | 5.5               | -3.8    | 5.0     | 20.0    | 10.7           | -20.9   |
| 586 | Tropisetron hydrochloride                | BRD-A83859836-003-02-8 | -8.7              | -6.5    | -4.0    | 0.5     | 3.9            | 2.6     |
| 587 | Calpeptin                                | BRD-A84045418-001-01-5 | 16.2              | 21.1    | -21.0   | -13.7   | 2.5            | -3.6    |
| 588 | MELOXICAM SODIUM                         | BRD-A84174393-236-03-0 | 13.8              | 1.0     | 13.8    | -2.8    | 15.2           | 8.5     |
| 589 | Baclofen (R,S)                           | BRD-A84174873-001-06-0 | -37.7             | -12.3   | 32.4    | 33.3    | 10.6           | 5.9     |
| 590 | MADECASSIC ACID                          | BRD-A84189249-001-03-2 | 30.9              | 60.8    | -44.1   | -30.9   | 28.0           | 16.7    |
| 591 | BACCATIN III                             | BRD-A84189516-001-01-2 | 10.0              | -3.5    | -10.3   | 1.9     | 11.8           | 11.7    |
| 592 | L-655,708                                | BRD-A84389091-001-01-1 | 7.6               | 0.8     | -6.2    | 0.5     | 16.5           | 8.0     |
| 593 | Tropanyl-3,5-dimethylbenzoate            | BRD-A84389633-001-02-4 | 5.2               | -12.1   | -13.0   | -20.0   | -0.7           | -2.4    |
| 594 | NISOLDIPINE                              | BRD-A84465106-001-01-2 | 264.7             | 329.5   | -46.6   | -72.4   | -16.9          | -35.4   |
| 595 | THIORIDAZINE HYDROCHLORIDE               | BRD-A84481105-003-17-2 | -96.8             | -96.1   | -94.0   | -95.8   | -71.6          | -76.8   |

| no. | Compound<br>Name                                      | Broad Institute ID     | Normalized scores |         |         |         |                |         |
|-----|-------------------------------------------------------|------------------------|-------------------|---------|---------|---------|----------------|---------|
|     |                                                       |                        | HPr+ DNA          |         | CBA     |         | Amplex Red_HRP |         |
|     |                                                       |                        | Plate 1           | Plate 2 | Plate 1 | Plate 2 | Plate 1        | Plate 2 |
| 596 | 3,16-DIDEOXYMEXICANOLIDE-3beta-DIOL                   | BRD-A84663931-001-03-9 | -10.6             | -21.8   | -47.9   | -51.7   | -29.1          | -30.2   |
| 597 | DEHYDROROTENONE                                       | BRD-A84913188-001-03-8 | 8.7               | 8.4     | -41.3   | -5.6    | 2.0            | 0.0     |
| 598 | 3 a-Bis-(4-fluorophenyl) methoxytropane hydrochloride | BRD-A85216385-003-01-6 | -28.4             | -45.7   | -83.1   | -83.6   | -58.9          | -54.9   |
| 599 | N6 -Cyclopentyladenosine                              | BRD-A85234536-001-04-5 | 8.6               | -0.3    | 6.3     | 26.7    | 18.3           | 21.2    |
| 600 | (-)-Quinpirole hydrochloride                          | BRD-A85280935-003-01-7 | 7.5               | 3.4     | 12.0    | -18.5   | 10.8           | 12.4    |
| 601 | L 670596                                              | BRD-A85472596-001-01-4 | -20.7             | -22.3   | -42.0   | -69.6   | -28.3          | -31.1   |
| 602 | MDL 72222                                             | BRD-A85587465-001-02-5 | -23.2             | -11.7   | -22.7   | -15.4   | -10.0          | -1.6    |
| 603 | USNIC ACID                                            | BRD-A85739295-001-03-6 | 15.3              | 49.9    | 21.7    | 23.4    | 7.1            | 11.8    |
| 604 | (?)-1-(1,2-Diphenylethyl)piperidine maleate           | BRD-A86415025-103-01-7 | -22.1             | -29.6   | 12.2    | 6.6     | 13.0           | 18.4    |
| 605 | Ganaxolone                                            | BRD-A87005460-001-01-3 | -9.3              | 4.8     | -20.0   | 10.0    | -21.2          | -12.1   |
| 606 | CEFPODOXIME PROXETIL                                  | BRD-A87387433-001-01-9 | 19.5              | 16.3    | 12.8    | 37.5    | 9.3            | 5.9     |
| 607 | Tenidap                                               | BRD-A87479750-001-01-9 | -18.0             | -19.9   | -29.3   | -32.9   | 7.6            | 0.1     |
| 608 | NADOLOL                                               | BRD-A87606379-001-13-3 | -0.9              | 0.9     | -4.1    | -17.6   | 10.2           | 10.5    |
| 609 | PRONETALOL HYDROCHLORIDE                              | BRD-A87715314-003-09-4 | -0.1              | -31.5   | -37.0   | 2.0     | 14.7           | 6.2     |
| 610 | EQUILIN                                               | BRD-A88080608-001-03-4 | 48.1              | 11.5    | -2.9    | -25.1   | -24.2          | -32.6   |
| 611 | HALCINONIDE                                           | BRD-A88138582-001-03-0 | 36.0              | 20.0    | -3.0    | 4.8     | 4.7            | -0.4    |
| 612 | ALBUTEROL (+/-)                                       | BRD-A88254928-001-05-3 | 16.4              | 10.9    | 2.2     | -10.0   | 4.7            | 9.2     |
| 613 | DIHYDROXY (3alpha,12alpha)PREGNAN-20-ONE              | BRD-A88284590-001-03-2 | 10.1              | -7.7    | -37.5   | -20.5   | -16.1          | -13.5   |
| 614 | SKF 38393 hydrobromide                                | BRD-A88548664-004-01-9 | 6.3               | 17.7    | -12.4   | -12.3   | -30.1          | -37.4   |
| 615 | BUCETIN                                               | BRD-A88684804-001-01-9 | -1.3              | 11.3    | -2.4    | 0.2     | 23.6           | 19.6    |
| 616 |                                                       | BRD-A88691025-001-07-4 | -5.7              | 2.4     | -3.3    | -0.9    | 5.5            | 10.6    |
| 617 | BISOPROLOL FUMARATE                                   | BRD-A89175223-051-05-6 | 7.9               | -0.3    | 11.6    | 20.7    | 25.4           | 28.9    |
| 618 | ICI 192,605                                           | BRD-A89208012-001-01-4 | -7.2              | -8.3    | -66.1   | -55.0   | -31.6          | -16.4   |
| 619 | jmw-topo1-04                                          | BRD-A89471977-001-05-2 | 6.9               | -2.7    | 22.5    | 26.2    | 6.9            | 16.2    |
| 620 | Mefloquine                                            | BRD-A89585551-003-08-3 | -52.4             | -72.9   | -91.6   | -105.5  | -82.2          | -99.4   |
| 621 | CGP 55845                                             | BRD-A89672324-001-02-2 | 15.6              | -5.3    | -4.0    | -10.0   | 1.6            | -0.4    |
| 622 | ALCLOMETAZONE DIPROPIONATE                            | BRD-A90131694-001-02-8 | -11.7             | -7.1    | -2.2    | -4.6    | -1.7           | 9.8     |
| 623 | ALPINETIN METHYL ETHER                                | BRD-A90249268-001-04-0 | -2.6              | -2.8    | -42.9   | -43.7   | -20.1          | -19.1   |
| 624 | Cilastatin sodium                                     | BRD-A90311807-236-01-4 | -3.7              | -11.0   | -9.6    | -4.5    | 9.9            | 13.5    |
| 625 | GUAIFENESIN                                           | BRD-A90515964-001-09-0 | 15.5              | -7.0    | -11.0   | 4.8     | 3.2            | -2.5    |
| 626 | ESTRONE BENZOATE                                      | BRD-A90969585-001-03-1 | 5.3               | 1.5     | -11.0   | -17.0   | 11.2           | 6.9     |
| 627 | BEPRIDIL HYDROCHLORIDE                                | BRD-A91008255-003-16-4 | -13.9             | -33.9   | -25.3   | -6.1    | -36.5          | -7.2    |
| 628 | LAPPACONITINE                                         | BRD-A91353509-001-01-4 | 1.9               | -3.7    | -9.7    | 0.2     | -4.0           | 4.6     |
| 629 | ESTRADIOL CYPIONATE                                   | BRD-A91452556-001-03-2 | -33.3             | -1.0    | 10.5    | 27.5    | 47.8           | 49.7    |
| 630 | CHLOROQUINE DIPHOSPHATE                               | BRD-A91699651-316-06-7 | -21.5             | 10.8    | -3.5    | -3.9    | 6.3            | 2.0     |
| 631 | ESTRADIOL-3-SULFATE, SODIUM SALT                      | BRD-A91702150-236-03-2 | -6.5              | -20.3   | 15.9    | 8.2     | 1.1            | 6.8     |
| 632 | CAMYLOFINE DIHYDROCHLORIDE                            | BRD-A91733352-300-01-1 | -9.1              | -11.0   | 8.8     | -7.2    | -1.0           | -0.6    |
| 633 | Siguazodan                                            | BRD-A91992993-001-01-2 | 5.1               | -5.2    | -3.4    | -10.4   | 7.2            | 16.6    |
| 634 | BETAMETHASONE ACETATE                                 | BRD-A92177080-001-01-3 | -6.0              | -1.0    | -4.1    | 20.0    | 5.2            | 7.6     |
| 635 | TRIAMCINOLONE ACETONIDE                               | BRD-A92439610-001-03-2 | -21.8             | 4.0     | 5.8     | 23.9    | 1.1            | 4.0     |
| 636 | DEOXSAPPANONE B 7,3'-DIMETHYL ETHER                   | BRD-A92542880-001-01-0 | 12.5              | 6.1     | -24.3   | -2.6    | -40.9          | -38.5   |
| 637 | RU 28318, potassium salt                              | BRD-A92585442-237-01-0 | -18.8             | -14.4   | 7.7     | -13.9   | -0.4           | 15.0    |
| 638 | TRIMEBUTINE MALEATE                                   | BRD-A92630576-050-14-2 | 6.8               | -16.6   | 16.6    | -6.3    | 23.1           | 23.9    |
| 639 | NALBUPHINE HYDROCHLORIDE                              | BRD-A92651262-003-03-9 | 22.6              | 6.4     | 17.9    | 15.3    | -18.8          | -24.9   |
| 640 | BICUCULLINE(-) METHIODIDE                             | BRD-A92652541-005-01-9 | -4.2              | -7.7    | -23.4   | -21.0   | -13.2          | -12.3   |
| 641 | LUPANINE PERCHLORATE                                  | BRD-A92826379-009-03-4 | 1.8               | 5.1     | 9.5     | 25.8    | 7.7            | 11.6    |

| no. | Compound<br>Name                                                                 | Broad Institute ID     | Normalized scores |         |         |         |                |         |
|-----|----------------------------------------------------------------------------------|------------------------|-------------------|---------|---------|---------|----------------|---------|
|     |                                                                                  |                        | HPr+ DNA          |         | CBA     |         | Amplex Red_HRP |         |
|     |                                                                                  |                        | Plate 1           | Plate 2 | Plate 1 | Plate 2 | Plate 1        | Plate 2 |
| 642 | SM-21 maleate                                                                    | BRD-A92933783-103-01-3 | -8.8              | -11.5   | -31.3   | -35.6   | -23.2          | -24.2   |
| 643 | Ciglitazone                                                                      | BRD-A93000692-001-03-2 | -8.6              | -20.8   | 22.5    | 5.2     | -9.6           | -20.8   |
| 644 | DIGITOXIN                                                                        | BRD-A93236127-001-03-7 | -3.7              | 11.1    | 12.6    | 11.6    | -0.2           | 6.4     |
| 645 | (+/-)-Clopidogrel hydrochloride                                                  | BRD-A93269281-003-01-0 | 15.4              | 0.8     | 2.6     | 4.5     | 28.0           | 22.1    |
| 646 | DEXAMETHASONE ACETATE                                                            | BRD-A93424738-001-03-0 | -13.8             | -15.9   | 3.6     | 2.6     | 1.1            | 1.9     |
| 647 | AF-DX 384                                                                        | BRD-A93436351-001-01-4 | -4.9              | -2.4    | 7.0     | -0.4    | 10.4           | 6.8     |
| 648 | PETCM                                                                            | BRD-A93477898-001-03-4 | 6.0               | 33.6    | 8.5     | 7.1     | 7.9            | 7.5     |
| 649 | MUNDULONE                                                                        | BRD-A93572202-001-03-3 | -35.2             | -38.0   | -58.8   | -20.4   | -22.6          | -25.7   |
| 650 | GR 89696 fumarate                                                                | BRD-A93659613-051-03-6 | -14.6             | -28.0   | -38.5   | -58.6   | -19.0          | -12.6   |
| 651 | ATROPINE SULFATE                                                                 | BRD-A93739713-065-03-5 | -1.3              | 21.1    | -33.9   | 0.5     | -5.0           | -0.3    |
| 652 | 17-PA                                                                            | BRD-A94046266-001-01-4 | -17.7             | -5.5    | 2.3     | 49.8    | 8.2            | 19.2    |
| 653 | TOTAROL ACETATE                                                                  | BRD-A94366206-001-03-5 | 7.5               | 9.4     | 49.6    | 12.5    | 17.7           | 35.8    |
| 654 | NTNCB hydrochloride                                                              | BRD-A94413429-003-01-6 | 6.7               | -8.0    | -3.6    | 10.3    | -25.7          | -26.7   |
| 655 | PREDNISOLONE SODIUM PHOSPHATE                                                    | BRD-A94523291-304-01-9 | 10.9              | 18.7    | 9.5     | 38.8    | 7.9            | 11.1    |
| 656 | BIFONAZOLE                                                                       | BRD-A94543220-001-12-2 | 1.0               | -14.2   | -61.0   | -53.3   | -13.5          | -18.0   |
| 657 | 21-ACETOXY-PREGNENOLONE                                                          | BRD-A94561690-001-02-6 | 22.1              | 58.9    | -14.6   | 19.9    | 43.6           | 36.6    |
| 658 | N-Methyl-N-[(1S)-1-phenyl-2-(1-pyrrolidinyl) ethyl]phenylacetamide hydrochloride | BRD-A94675310-003-01-2 | -3.0              | -8.7    | 23.7    | 47.7    | 7.7            | 5.8     |
| 659 | METAXALONE                                                                       | BRD-A94709349-001-03-4 | -12.5             | -16.2   | -13.9   | -13.3   | 0.8            | 4.4     |
| 660 | DIGOXIN                                                                          | BRD-A94756469-001-03-9 | -21.9             | 10.3    | 24.2    | 15.1    | 15.2           | 22.2    |
| 661 | CYPROTERONE ACETATE                                                              | BRD-A95207036-001-03-6 | -0.2              | -3.9    | -26.8   | -43.2   | -21.4          | -30.6   |
| 662 | ANDROSTA-1,4-DIEN-3,17-DIONE                                                     | BRD-A95513702-001-03-0 | -20.3             | -19.7   | -9.2    | -14.1   | 1.3            | 13.0    |
| 663 | Nisoxetine hydrochloride                                                         | BRD-A95696066-003-06-2 | -7.6              | -8.1    | -8.3    | -0.6    | 3.9            | 12.0    |
| 664 | INDAPAMIDE                                                                       | BRD-A95869247-001-14-5 | 13.3              | 3.9     | 6.3     | 8.2     | -8.8           | -9.0    |
| 665 | FPL 55712                                                                        | BRD-A96456596-001-01-4 | -45.0             | -43.9   | -83.3   | -93.3   | -45.4          | -49.9   |
| 666 | EBPC                                                                             | BRD-A96485169-001-05-1 | -9.9              | -10.3   | 7.3     | 9.1     | 12.8           | 19.6    |
| 667 | 5alpha-ANDROSTAN-3,17-DIONE                                                      | BRD-A96828973-001-05-8 | -3.5              | -8.5    | -23.0   | 5.9     | 2.6            | -5.9    |
| 668 | L-732,138                                                                        | BRD-A96882008-001-01-3 | -11.9             | -9.8    | -14.7   | -15.6   | -25.0          | -27.9   |
| 669 | HYDROQUININE HYDROBROMIDE HYDRATE                                                | BRD-A96933311-337-01-4 | 4.0               | 1.2     | 7.4     | -6.4    | 0.1            | 2.5     |
| 670 | DECAHYDROGAMBOGIC ACID                                                           | BRD-A97026779-001-01-3 | 6.8               | -0.5    | -5.6    | 78.5    | 16.2           | 29.2    |
| 671 | FENOTEROL HYDROBROMIDE                                                           | BRD-A97104540-004-08-5 | 1.0               | -4.0    | 16.0    | 16.2    | 11.4           | 12.9    |
| 672 | ISOKOBUSONE                                                                      | BRD-A97152619-001-03-7 | 29.7              | 26.7    | -3.5    | 13.6    | 26.0           | 20.3    |
| 673 | ROSIGLITAZONE                                                                    | BRD-A97437073-001-04-9 | 3.8               | -8.5    | -0.1    | 0.2     | 2.3            | 8.0     |
| 674 | PIPERIDOLATE HYDROCHLORIDE                                                       | BRD-A97479839-003-08-3 | -22.4             | 18.5    | -21.1   | -22.0   | -16.7          | -4.9    |
| 675 | RANOLAZINE                                                                       | BRD-A97674275-001-04-3 | -2.9              | 14.4    | 16.6    | -6.5    | 15.4           | 25.7    |
| 676 | PINDOLOL                                                                         | BRD-A97701745-001-09-5 | -4.3              | -10.4   | 20.6    | 7.7     | 18.3           | 22.6    |
| 677 | KETOPROFEN                                                                       | BRD-A97739905-001-15-8 | -31.6             | -32.3   | 2.3     | -12.0   | 15.8           | 10.8    |
| 678 | Talniflumate                                                                     | BRD-A98378129-001-01-4 | -26.0             | -17.1   | -13.9   | -26.3   | -26.2          | -21.9   |
| 679 | CARBENOXOLONE SODIUM                                                             | BRD-A98702003-304-03-0 | 1.0               | -24.9   | -25.2   | -16.9   | -10.6          | 5.1     |
| 680 | Methysergide maleate                                                             | BRD-A98725278-103-01-9 | 33.9              | 35.3    | 101.9   | 113.9   | 19.1           | 20.3    |
| 681 | HYDROXYCHLOROQUINE SULFATE                                                       | BRD-A99117172-065-02-4 | 12.0              | 3.0     | -10.3   | 22.4    | 2.2            | 15.0    |
| 682 | EVOXINE                                                                          | BRD-A99268498-001-06-8 | 8.5               | -4.8    | 110.4   | 76.1    | 4.1            | -0.1    |
| 683 | NAFCILLIN SODIUM                                                                 | BRD-A99402294-236-03-8 | -22.2             | -30.2   | 13.8    | 7.8     | -5.3           | 12.5    |
| 684 | MT-21                                                                            | BRD-A99449986-001-01-4 | -12.1             | 5.8     | 21.6    | 24.3    | -10.8          | -13.5   |
| 685 | ETHOSUXIMIDE                                                                     | BRD-A99633051-001-05-4 | 9.1               | 6.1     | 13.4    | -9.6    | -2.7           | 3.2     |
| 686 | TRILOSTANE                                                                       | BRD-A99644790-001-01-6 | -6.7              | -10.7   | -46.8   | -29.7   | -1.8           | 1.5     |
| 687 | Nicergoline                                                                      | BRD-A99721021-001-01-3 | -2.1              | -8.6    | -23.8   | -25.7   | -4.4           | -13.0   |



| no. | Compound<br>Name                                                           | Broad Institute ID     | Normalized scores |         |         |         |                |         |
|-----|----------------------------------------------------------------------------|------------------------|-------------------|---------|---------|---------|----------------|---------|
|     |                                                                            |                        | HPr+ DNA          |         | CBA     |         | Amplex Red_HRP |         |
|     |                                                                            |                        | Plate 1           | Plate 2 | Plate 1 | Plate 2 | Plate 1        | Plate 2 |
| 688 | P1075                                                                      | BRD-K00206590-001-01-2 | 6.7               | 17.7    | 21.1    | 0.9     | 15.4           | 14.8    |
| 689 | PPT                                                                        | BRD-K00312224-001-03-8 | -38.3             | -35.8   | -75.2   | -79.1   | 8.2            | 7.1     |
| 690 | RITA                                                                       | BRD-K00317371-001-01-2 | -29.4             | -24.3   | 25.4    | 44.3    | -31.1          | -37.7   |
| 691 | Ro 08-2750                                                                 | BRD-K00486786-001-01-4 | 316.8             | 315.9   | 12.8    | 9.3     | -18.9          | -3.7    |
| 692 |                                                                            | BRD-K00535541-311-04-1 | -5.6              | -1.1    | 9.5     | 14.9    | 2.8            | 19.1    |
| 693 | TICLOPIDINE HYDROCHLORIDE                                                  | BRD-K00603606-003-13-3 | -9.3              | -15.9   | 32.4    | 11.3    | 9.0            | 14.9    |
| 694 | Altanserin hydrochloride                                                   | BRD-K00610438-003-01-7 | 4.3               | 2.9     | -23.1   | -20.9   | 1.1            | -3.8    |
| 695 | CL 218872                                                                  | BRD-K00662280-001-04-5 | -2.5              | -4.0    | 3.4     | 7.6     | 5.6            | 5.0     |
| 696 | FAMOTIDINE                                                                 | BRD-K00673382-001-07-2 | 1.1               | 9.6     | 17.8    | 12.4    | 12.3           | 5.9     |
| 697 | CL 82198 hydrochloride                                                     | BRD-K00675675-003-01-2 | -16.4             | -8.7    | -4.6    | 12.7    | 21.4           | 24.4    |
| 698 | 2,4-DIHYDROXYCHALCONE                                                      | BRD-K00721105-001-01-8 | 8.0               | 6.5     | -9.3    | -30.7   | -19.9          | -27.4   |
| 699 | SULFAMETHOXYPIRIDAZINE                                                     | BRD-K00938507-001-13-7 | -8.6              | 29.6    | 0.6     | 53.1    | 31.4           | 22.8    |
| 700 | CLOXACILLIN SODIUM                                                         | BRD-K01244426-236-08-9 | -7.4              | -24.0   | 1.0     | 7.4     | 16.8           | 12.4    |
| 701 | PIMOZIDE                                                                   | BRD-K01292756-001-13-6 | -20.0             | -19.7   | -60.0   | -50.0   | -43.2          | -30.0   |
| 702 | 2,4-Dichlorophenoxyacetic acid                                             | BRD-K01473791-001-06-3 | 7.7               | 16.3    | -17.5   | -5.6    | -16.7          | -2.7    |
| 703 | APIGENIN                                                                   | BRD-K01493881-001-17-9 | 11.1              | 21.3    | -39.0   | -35.7   | -8.5           | -15.0   |
| 704 |                                                                            | BRD-K01567962-001-08-1 | 1.1               | -1.8    | 25.5    | 21.2    | 13.8           | 20.1    |
| 705 | LE 300                                                                     | BRD-K01648091-001-04-2 | -17.2             | -22.4   | 19.6    | 13.4    | -16.7          | 4.7     |
| 706 | INDOLE-3-CARBINOL                                                          | BRD-K01815685-001-07-2 | -5.2              | -16.1   | 45.8    | 38.4    | -0.9           | 2.3     |
| 707 | CARAPIN-8(9)-ENE                                                           | BRD-K01818918-001-03-4 | -1.1              | 20.0    | -77.1   | -37.0   | 27.2           | -2.4    |
| 708 | DPCPX                                                                      | BRD-K01824921-001-10-2 | -14.2             | -17.2   | 11.8    | 31.1    | 13.1           | 22.7    |
| 709 | RS 23597-190 hydrochloride                                                 | BRD-K01868942-003-01-9 | -35.7             | -3.8    | 20.7    | 24.2    | 0.7            | 6.8     |
| 710 | WY 14643                                                                   | BRD-K01902415-001-03-4 | -5.0              | -3.9    | 6.0     | -5.5    | 17.8           | 21.8    |
| 711 | SUCCINYLSULFATHIAZOLE                                                      | BRD-K01950558-001-09-7 | 8.5               | 12.5    | -23.5   | 20.8    | 18.2           | 5.0     |
| 712 | PACHYRRHIZIN                                                               | BRD-K02070226-001-03-8 | 22.2              | 7.3     | 9.0     | -2.9    | -21.4          | -28.4   |
| 713 | panobinostat                                                               | BRD-K02130563-001-07-2 | 0.0               | -12.8   | 11.6    | 59.1    | -15.2          | -22.5   |
| 714 | AMOXAPINE                                                                  | BRD-K02265150-001-15-8 | -50.4             | -49.4   | -80.3   | -71.7   | -31.0          | -50.6   |
| 715 | GR 32191 hydrochloride                                                     | BRD-K02283807-003-01-4 | -15.9             | -13.8   | -51.5   | -70.4   | -27.0          | -23.1   |
| 716 | CAFFEINE                                                                   | BRD-K02404261-001-07-6 | -0.7              | 6.8     | 25.7    | 10.6    | 23.0           | 23.7    |
| 717 | Parbendazole                                                               | BRD-K02407574-001-04-8 | 6.9               | 5.3     | -2.0    | 1.8     | 26.7           | 33.0    |
| 718 | ETHYL PARABEN                                                              | BRD-K02464583-001-01-4 | 23.1              | 21.0    | -3.2    | 1.8     | 5.1            | -11.1   |
| 719 | O-2050                                                                     | BRD-K02590140-001-01-2 | -22.2             | -12.8   | -3.6    | -13.4   | -12.9          | -17.5   |
| 720 | CELECOXIB                                                                  | BRD-K02637541-001-06-5 | 10.3              | 23.2    | -32.2   | -29.8   | 29.5           | 24.4    |
| 721 | RESVERATROL 4'-METHYL ETHER                                                | BRD-K02671211-001-03-0 | 0.5               | -3.8    | 16.4    | -18.0   | -1.4           | -6.7    |
| 722 | HYDRASTINE (1R, 9S)                                                        | BRD-K02715688-001-01-3 | -0.7              | -8.9    | 5.2     | 5.3     | -2.0           | 22.2    |
| 723 | Methiazole                                                                 | BRD-K02764365-001-05-2 | 10.9              | -4.6    | 42.7    | 33.9    | 17.3           | 28.4    |
| 724 | 2-METHOXYXANTHONE                                                          | BRD-K02855712-001-06-6 | 16.1              | -1.7    | 151.9   | 127.9   | 7.3            | -4.9    |
| 725 | MINAPRINE HYDROCHLORIDE                                                    | BRD-K02867583-300-06-3 | -13.8             | -18.8   | -3.2    | -14.2   | 5.0            | 12.6    |
| 726 | CLOFOCTOL                                                                  | BRD-K02900412-001-07-1 | -19.4             | -7.1    | -26.7   | -16.2   | 9.7            | 1.1     |
| 727 | Forskolin, 7-Deacetyl-7-[O-(N-methylpiperazino)-g-butyl]-, Dihydrochloride | BRD-K03015355-003-01-5 | -7.1              | -14.5   | 9.6     | 7.6     | -0.4           | -2.1    |
| 728 | ARACHIDONIC ACID                                                           | BRD-K03070961-001-04-4 | 17.6              | 9.7     | 2.5     | -32.4   | 10.8           | 0.0     |
| 729 | A-7 hydrochloride                                                          | BRD-K03301001-003-01-7 | -53.5             | -58.6   | -97.0   | -94.9   | -75.1          | -78.4   |
| 730 | Linomide                                                                   | BRD-K03384561-001-01-9 | -6.3              | -8.1    | 19.1    | -2.4    | -3.7           | 13.4    |
| 731 | DMNB                                                                       | BRD-K03564313-001-02-5 | 28.3              | 21.2    | -4.2    | 6.3     | 9.1            | 14.1    |
| 732 | U0124                                                                      | BRD-K03635852-001-01-2 | 0.1               | 18.4    | 64.8    | 28.1    | -36.0          | -38.3   |
| 733 | AY 9944                                                                    | BRD-K03642198-300-01-7 | -27.2             | -23.5   | -48.0   | -41.1   | -35.3          | -26.9   |

| no. | Compound<br>Name             | Broad Institute ID     | Normalized scores |         |         |         |                |         |
|-----|------------------------------|------------------------|-------------------|---------|---------|---------|----------------|---------|
|     |                              |                        | HPr+ DNA          |         | CBA     |         | Amplex Red_HRP |         |
|     |                              |                        | Plate 1           | Plate 2 | Plate 1 | Plate 2 | Plate 1        | Plate 2 |
| 734 | Raclopride                   | BRD-K04111260-001-05-0 | -15.8             | -6.3    | 0.9     | -2.3    | 10.0           | 13.5    |
| 735 | OXCARBAZEPINE                | BRD-K04196797-001-12-9 | 1.9               | 1.3     | -21.0   | 25.6    | 7.9            | 18.9    |
| 736 | SB 222200                    | BRD-K04414442-001-03-4 | -16.0             | -7.1    | -4.7    | -11.1   | 9.4            | 5.8     |
| 737 | 7-NINA                       | BRD-K04430056-236-01-3 | 14.3              | 14.4    | 14.0    | 2.6     | 3.6            | 2.1     |
| 738 | CLEMIZOLE HYDROCHLORIDE      | BRD-K04704168-003-11-9 | -10.5             | 11.2    | -13.8   | -49.3   | -22.2          | -19.1   |
| 739 | SULFISOXAZOLE ACETYL         | BRD-K05009775-001-01-2 | -4.5              | -15.2   | -28.5   | 2.7     | 13.7           | 13.8    |
| 740 | ZK 164015                    | BRD-K05151076-001-01-8 | 0.6               | 3.9     | -4.0    | 11.2    | 16.4           | 13.1    |
| 741 | NGB 2904                     | BRD-K05181084-003-02-9 | 8.9               | -5.0    | 1.6     | -1.5    | 15.5           | 1.1     |
| 742 | L-741,626                    | BRD-K05181463-001-04-0 | -17.0             | -6.0    | -34.8   | -31.2   | -6.0           | -1.8    |
| 743 | SC-10                        | BRD-K05361803-001-02-1 | 25.0              | 7.6     | 19.9    | 40.5    | 2.2            | -9.5    |
| 744 | NICOTINE DITARTRATE          | BRD-K05395900-322-04-7 | -6.6              | -3.8    | 2.3     | -0.3    | 21.6           | 5.9     |
| 745 | HA-1004                      | BRD-K05434375-001-03-2 | 3.0               | 7.3     | -20.4   | -11.0   | -7.3           | -3.7    |
| 746 | JX 401                       | BRD-K05464208-001-01-6 | -8.7              | -0.2    | -41.8   | -37.5   | -32.1          | -30.9   |
| 747 | L-745,870 trihydrochloride   | BRD-K05528470-305-01-4 | -16.5             | -6.5    | -33.9   | -40.1   | -30.6          | -28.7   |
| 748 | FTAXILIDE                    | BRD-K05724540-001-04-4 | 4.5               | 0.2     | -21.3   | -2.9    | 17.5           | 19.2    |
| 749 | MT001_073                    | BRD-K05878375-236-02-4 | -5.1              | -13.0   | 1.8     | -1.9    | 16.9           | 19.4    |
| 750 | FLUCONAZOLE                  | BRD-K05977355-001-09-1 | -5.9              | 1.2     | 6.3     | 1.4     | 6.4            | 14.9    |
| 751 | DH 97                        | BRD-K06014311-001-01-2 | 32.7              | 21.5    | 10.7    | 18.5    | 33.2           | 21.6    |
| 752 | Telenzepine dihydrochloride  | BRD-K06147391-300-04-3 | -17.8             | -13.7   | 14.8    | 18.8    | 15.6           | 20.2    |
| 753 | CCMQ                         | BRD-K06159959-001-01-2 | 15.3              | 16.9    | 8.5     | 25.3    | 17.8           | 23.2    |
| 754 | Carbetapentane citrate       | BRD-K06181161-048-07-8 | -6.6              | -13.7   | -13.4   | -20.0   | -2.3           | -0.3    |
| 755 | YS-035 hydrochloride         | BRD-K06208435-003-03-3 | 4.1               | 2.7     | 7.7     | 18.7    | 18.9           | 22.2    |
| 756 | DuP 697                      | BRD-K06221026-001-03-5 | -13.3             | 2.2     | 19.8    | 38.2    | 39.7           | 39.1    |
| 757 | LY 364947                    | BRD-K06234293-001-01-8 | -4.3              | -11.3   | -13.2   | -9.2    | 7.9            | 11.5    |
| 758 | ROTENONIC ACID, METHYL ETHER | BRD-K06268662-001-03-5 | -4.9              | 0.2     | 4.2     | -27.8   | -15.1          | -3.6    |
| 759 | N-METHYLANTHRANILIC ACID     | BRD-K06439119-001-03-1 | 2.7               | -26.1   | 56.7    | 56.3    | 3.4            | 12.2    |
| 760 | Ro 31-8220 mesylate          | BRD-K06543683-066-01-3 | -5.7              | -15.3   | -49.5   | -49.8   | -46.8          | -52.4   |
| 761 | FAST GREEN FCF               | BRD-K06561965-304-01-9 | 18.7              | 22.5    | -9.7    | -18.0   | -32.9          | -27.6   |
| 762 | Cisapride                    | BRD-K06895174-001-01-0 | -6.4              | -11.1   | -40.2   | -50.5   | -24.3          | -24.3   |
| 763 | MINOXIDIL                    | BRD-K06902185-001-10-2 | 18.5              | 18.9    | 17.2    | 3.5     | 16.7           | 23.7    |
| 764 | PROMAZINE HYDROCHLORIDE      | BRD-K06980535-003-15-0 | -26.9             | -57.0   | -72.5   | -74.0   | -71.1          | -69.5   |
| 765 | XANTHURENIC ACID             | BRD-K07327532-001-03-6 | 24.0              | 23.7    | 6.7     | -10.7   | -1.2           | -3.8    |
| 766 | BRL 37344, sodium salt       | BRD-K07507905-236-01-8 | 2.4               | -2.4    | 3.9     | -5.8    | 8.7            | 7.4     |
| 767 | curcumin                     | BRD-K07572174-001-19-6 | 36.6              | 44.7    | -26.4   | -18.7   | -42.8          | -45.7   |
| 768 | ACECAINIDE HYDROCHLORIDE     | BRD-K07753030-003-11-9 | -1.0              | 0.6     | 1.6     | -9.1    | 7.7            | 7.1     |
| 769 | LINCOMYCIN HYDROCHLORIDE     | BRD-K08033334-003-03-5 | -37.8             | -0.7    | 13.3    | 8.6     | 3.9            | 20.5    |
| 770 | PRIMULETIN                   | BRD-K08048246-001-03-4 | 27.3              | 20.1    | 8.3     | 7.9     | 19.3           | 16.2    |
| 771 | TETRANDRINE                  | BRD-K08078237-001-13-1 | -28.4             | -32.8   | -66.4   | -64.8   | -73.6          | -73.7   |
| 772 | L-701,324                    | BRD-K08109516-001-02-9 | 30.0              | -4.7    | -5.7    | 14.8    | 9.2            | 11.2    |
| 773 | AG 1288                      | BRD-K08115555-001-02-8 | 11.9              | -2.0    | -12.5   | -13.4   | -6.2           | -0.1    |
| 774 | AG 825                       | BRD-K08132273-001-01-6 | -40.8             | -9.4    | -43.5   | -30.9   | -20.4          | -21.1   |
| 775 | 5-Nonyloxytryptamine oxalate | BRD-K08219523-034-01-0 | -96.6             | -97.5   | -110.4  | -111.6  | -81.8          | -84.0   |
| 776 | DICLOFENAC SODIUM            | BRD-K08252256-236-17-1 | 3.3               | 10.8    | -22.7   | -26.4   | -6.5           | -8.5    |
| 777 | GRISEOFULVIN                 | BRD-K08273968-001-09-1 | 22.9              | 0.8     | 4.3     | 32.9    | 11.8           | 2.8     |
| 778 | BUTYL PARABEN                | BRD-K08287586-001-08-5 | -11.6             | -8.1    | -28.8   | -37.3   | -18.7          | -12.1   |
| 779 | CHLORPYRIFOS                 | BRD-K08303368-001-06-8 | -3.6              | -12.7   | -13.3   | 7.9     | -2.0           | 8.3     |

| no. | Compound<br>Name                    | Broad Institute ID     | Normalized scores |         |         |         |                |         |
|-----|-------------------------------------|------------------------|-------------------|---------|---------|---------|----------------|---------|
|     |                                     |                        | HPr+ DNA          |         | CBA     |         | Amplex Red_HRP |         |
|     |                                     |                        | Plate 1           | Plate 2 | Plate 1 | Plate 2 | Plate 1        | Plate 2 |
| 780 | ROTENONE                            | BRD-K08316444-001-05-0 | 16.7              | 39.5    | 14.5    | 30.0    | 8.8            | -10.2   |
| 781 | XYLOMETAZOLINE HYDROCHLORIDE        | BRD-K08356259-003-15-5 | 6.5               | 1.8     | -22.3   | -5.4    | 14.7           | 5.6     |
| 782 | NNC 26-9100                         | BRD-K08438429-001-01-0 | -88.7             | -83.5   | -111.0  | -111.8  | -88.2          | -88.3   |
| 783 | SARAFLOXACIN HYDROCHLORIDE          | BRD-K08525451-003-03-7 | 4.7               | 1.5     | 4.5     | -3.4    | 1.3            | -0.6    |
| 784 | RS 100329 hydrochloride             | BRD-K08640512-003-01-5 | 15.3              | -7.9    | 10.9    | 14.0    | 12.2           | 19.3    |
| 785 | HETEROPEUCENIN, METHYL ETHER        | BRD-K08745849-001-03-6 | 35.2              | 71.9    | 28.3    | 62.1    | 29.5           | 22.7    |
| 786 | NARINGENIN                          | BRD-K08832567-001-06-5 | 22.8              | 7.6     | -19.3   | 1.7     | -11.1          | -5.6    |
| 787 | Co 102862                           | BRD-K08890269-001-01-5 | 36.9              | 12.9    | 25.5    | 42.1    | 24.9           | 26.3    |
| 788 | Zolantidine dimaleate               | BRD-K08996725-313-01-7 | -28.2             | -24.8   | -39.4   | -24.9   | -31.0          | -41.1   |
| 789 | Fananserin                          | BRD-K08998509-001-01-6 | 80.5              | 50.6    | 59.7    | 84.1    | 60.2           | 69.1    |
| 790 | PIPEMIDIC ACID                      | BRD-K08999871-001-13-9 | 16.6              | 5.7     | 19.2    | 11.0    | 13.9           | 12.7    |
| 791 | D 4476                              | BRD-K09132007-001-01-8 | -5.8              | 10.2    | 14.9    | 18.8    | -14.3          | -9.1    |
| 792 | 4'-METHOXYCHALCONE                  | BRD-K09233738-001-04-4 | -33.8             | -32.5   | -88.1   | -54.2   | -21.9          | -20.1   |
| 793 | SR 57227 hydrochloride              | BRD-K09397065-003-03-8 | -1.4              | 10.7    | -5.3    | 3.2     | 16.8           | 18.3    |
| 794 | LOVASTATIN                          | BRD-K09416995-001-21-7 | -5.8              | -0.3    | -45.7   | -28.3   | -25.7          | -11.9   |
| 795 | NU7026                              | BRD-K09537769-001-02-4 | -3.2              | -10.2   | 15.7    | 12.4    | -4.1           | 1.9     |
| 796 | Mibefradil dihydrochloride          | BRD-K09549677-300-01-8 | -52.0             | -50.0   | -89.2   | -89.3   | -67.2          | -73.8   |
| 797 | THIOTEPA                            | BRD-K09631521-001-05-7 | -2.6              | -3.9    | -7.7    | 20.4    | 10.9           | 12.9    |
| 798 | DEFEROXAMINE MESYLATE               | BRD-K09821361-066-15-9 | 35.0              | 17.1    | 44.5    | 56.4    | -6.3           | -9.6    |
| 799 | N-Desmethylozapine                  | BRD-K10042277-001-04-3 | -26.9             | -29.1   | -72.6   | -72.0   | -45.9          | -50.8   |
| 800 | DANTHRON                            | BRD-K10065684-001-06-6 | 30.3              | 9.4     | 19.7    | 9.0     | 19.0           | 9.1     |
| 801 | L-701,252                           | BRD-K10176267-001-02-5 | 6.4               | -16.4   | -8.1    | 4.4     | -3.2           | 8.7     |
| 802 | PSB 11                              | BRD-K10177585-003-01-6 | -20.3             | 26.3    | -2.1    | -19.4   | -15.1          | 6.5     |
| 803 | MECLOFENOXATE HYDROCHLORIDE         | BRD-K10314788-003-07-7 | 4.7               | -4.3    | -23.6   | 1.9     | -7.9           | -5.5    |
| 804 | SULFASALAZINE                       | BRD-K10670311-001-08-0 | -8.2              | -11.0   | -55.4   | -12.5   | 8.2            | 4.4     |
| 805 | SULFAPHENAZOLE                      | BRD-K10671814-001-09-8 | -13.4             | -3.4    | -32.9   | 6.3     | -8.8           | 1.3     |
| 806 | S-Isopropylisothiourea hydrobromide | BRD-K10673031-004-01-2 | -7.8              | -16.4   | -17.2   | -23.7   | 1.3            | 5.2     |
| 807 | PHENYLBUTAZONE                      | BRD-K10843433-001-12-8 | 3.4               | 3.4     | -17.9   | -6.1    | 23.0           | 19.3    |
| 808 | DILOXANIDE FUROATE                  | BRD-K10974103-001-14-6 | -10.2             | -22.4   | -25.6   | -21.8   | 0.9            | 9.0     |
| 809 | PERPHENAZINE                        | BRD-K10995081-001-15-4 | -88.0             | -89.7   | -103.3  | -102.4  | -72.8          | -75.5   |
| 810 | ACETANILIDE                         | BRD-K11094367-001-04-4 | -14.2             | 1.2     | -24.2   | 1.8     | 31.9           | 17.2    |
| 811 | Tiotidine                           | BRD-K11107424-001-01-1 | 3.0               | 19.6    | 24.6    | 32.8    | 12.4           | 28.6    |
| 812 | GEMFIBROZIL                         | BRD-K11129031-001-15-0 | -11.4             | 4.1     | 10.6    | -7.2    | -2.2           | -0.3    |
| 813 | TYRPHOSTIN B44 (-)                  | BRD-K11158509-001-02-0 | -5.6              | -0.3    | 24.1    | 21.8    | 19.3           | 19.6    |
| 814 | NORFLOXACIN                         | BRD-K11196887-001-15-4 | 3.5               | -14.4   | 57.3    | 42.7    | -0.5           | 10.2    |
| 815 | AMBROXOL HYDROCHLORIDE              | BRD-K11223672-003-04-5 | -24.5             | -19.8   | -22.7   | 9.4     | 2.6            | 2.3     |
| 816 | RUTILANTINONE                       | BRD-K11258719-001-03-2 | 309.9             | 341.8   | 23.8    | 22.8    | -26.1          | -35.8   |
| 817 | ZD 7155 hydrochloride               | BRD-K11373525-003-01-3 | 8.9               | 16.2    | 14.2    | 26.0    | 19.4           | 19.6    |
| 818 | GBR 13069 dihydrochloride           | BRD-K11634954-300-01-8 | 19.7              | 21.1    | -32.5   | -21.1   | -3.2           | -10.4   |
| 819 | BU 239 hydrochloride                | BRD-K11696279-003-01-5 | -2.2              | -2.0    | 13.2    | 17.7    | 11.3           | 12.9    |
| 820 | BENZBROMARONE                       | BRD-K11717138-001-16-2 | -69.6             | -65.0   | -95.4   | -88.7   | -75.1          | -77.8   |
| 821 | TRIPROLIDINE HYDROCHLORIDE          | BRD-K11742128-003-15-0 | -18.8             | -19.1   | 1.2     | -1.1    | 10.6           | 5.9     |
| 822 | FURAZOLIDONE                        | BRD-K11756522-001-04-0 | 42.4              | 54.3    | 56.4    | 30.7    | 17.2           | -0.3    |
| 823 | NBQX                                | BRD-K11796549-001-02-9 | 4.9               | 13.7    | 14.8    | 21.4    | -2.3           | 3.9     |
| 824 | GR 127935 hydrochloride             | BRD-K11911061-003-02-8 | -73.0             | -73.7   | -58.4   | -96.6   | -89.7          | -91.5   |
| 825 | ER 27319 maleate                    | BRD-K11927976-050-01-1 | -6.2              | 6.8     | -12.2   | -16.1   | -8.2           | -3.9    |

| no. | Compound<br>Name                                          | Broad Institute ID     | Normalized scores |         |         |         |                |         |
|-----|-----------------------------------------------------------|------------------------|-------------------|---------|---------|---------|----------------|---------|
|     |                                                           |                        | HPr+ DNA          |         | CBA     |         | Amplex Red_HRP |         |
|     |                                                           |                        | Plate 1           | Plate 2 | Plate 1 | Plate 2 | Plate 1        | Plate 2 |
| 826 | alpha-MANGOSTIN                                           | BRD-K11991978-001-03-4 | -9.9              | -26.2   | -63.7   | -83.0   | -23.2          | -35.5   |
| 827 | PD 160170                                                 | BRD-K12079898-001-01-8 | 8.2               | 11.1    | 2.8     | -2.9    | 11.7           | 1.8     |
| 828 | NIALAMIDE                                                 | BRD-K12102668-001-14-9 | 36.3              | 33.5    | 42.5    | 14.8    | 21.5           | 13.8    |
| 829 | GR 144053 trihydrochloride                                | BRD-K12120659-305-01-4 | -5.9              | -5.8    | -12.7   | 7.4     | -3.4           | 6.6     |
| 830 | Flunarizine dihydrochloride                               | BRD-K12184470-300-01-8 | -9.2              | -4.6    | 1.8     | 13.4    | -5.6           | 25.4    |
| 831 | METHYL ORSELLINATE                                        | BRD-K12202814-001-05-8 | 20.4              | 16.7    | 20.2    | 15.5    | -8.0           | 5.9     |
| 832 | GLIPIZIDE                                                 | BRD-K12219985-001-15-4 | -14.6             | -15.9   | -6.0    | -2.5    | 8.9            | 13.4    |
| 833 | XANTHOXYLIN                                               | BRD-K12260308-001-04-2 | -7.1              | 7.4     | -9.4    | 0.6     | 9.5            | 17.0    |
| 834 | JUAREZIC ACID                                             | BRD-K12345912-001-03-1 | 14.1              | -11.3   | -18.5   | 7.0     | 14.4           | 12.1    |
| 835 | AG 490                                                    | BRD-K12357156-001-01-5 | 7.6               | 19.8    | -23.6   | -28.7   | -41.1          | -46.1   |
| 836 | FENBUFEN                                                  | BRD-K12513978-001-16-7 | 1.4               | -5.5    | -17.7   | -16.6   | -3.8           | 16.8    |
| 837 | Zaprinast                                                 | BRD-K12516989-001-01-9 | 22.6              | 44.8    | 26.7    | 9.2     | 29.1           | 20.5    |
| 838 | NOCODAZOLE                                                | BRD-K12539581-001-14-6 | 9.4               | 12.9    | 40.0    | 60.9    | 0.1            | 8.1     |
| 839 | EXALAMIDE                                                 | BRD-K12609457-001-02-3 | 7.8               | 14.2    | -35.2   | -36.4   | -7.7           | -36.9   |
| 840 | KAEMPFEROL                                                | BRD-K12807006-001-10-2 | 43.3              | 63.0    | -22.4   | -7.7    | -16.7          | -25.9   |
| 841 | MECHLORETHAMINE                                           | BRD-K12829205-001-03-0 | -32.1             | -18.3   | -18.5   | 0.4     | -0.3           | 4.5     |
| 842 | YM 976                                                    | BRD-K12932420-001-01-5 | 23.6              | 13.7    | 10.4    | 12.6    | 33.9           | 22.0    |
| 843 | BERGAPTEN                                                 | BRD-K12968785-001-06-7 | 0.2               | 4.4     | 31.6    | 24.0    | 26.4           | 28.7    |
| 844 | GYROMITRIN                                                | BRD-K13037776-001-01-2 | 7.0               | -15.6   | -1.9    | -6.1    | 0.8            | 9.5     |
| 845 | CICLOPIROX OLAMINE                                        | BRD-K13044802-213-09-0 | 95.0              | 100.6   | 25.9    | 38.8    | 7.6            | 3.6     |
| 846 | HYDROCHLOROTHIAZIDE                                       | BRD-K13078532-001-17-7 | -24.3             | 0.2     | 12.0    | -7.0    | 12.2           | 17.2    |
| 847 | Artemisinin                                               | BRD-K13112821-001-08-3 | -1.8              | -11.9   | -9.7    | -6.7    | 9.9            | -1.6    |
| 848 | ppn-schn-2                                                | BRD-K13169950-001-07-8 | 28.4              | 37.9    | 25.3    | 25.5    | 1.3            | 28.5    |
| 849 | PENTAMIDINE ISETHIONATE                                   | BRD-K13183738-317-06-0 | 7.0               | -16.9   | 11.9    | 0.3     | 6.8            | 9.1     |
| 850 | L-741,742 hydrochloride                                   | BRD-K13211965-003-01-0 | -7.9              | -6.1    | -54.7   | -53.4   | -25.9          | -36.6   |
| 851 | CARSALAM                                                  | BRD-K13238618-001-01-8 | -6.5              | -5.6    | -18.2   | 22.1    | 4.6            | 18.3    |
| 852 | LY-163,502                                                | BRD-K13261168-001-01-4 | -3.5              | -10.7   | 10.4    | 5.5     | 14.1           | 0.4     |
| 853 | beta-PELTATIN                                             | BRD-K13265046-001-02-1 | 35.8              | 36.0    | 57.8    | 33.7    | 7.7            | -2.0    |
| 854 | METHAZOLAMIDE                                             | BRD-K13356952-001-15-2 | -33.2             | -8.6    | -34.1   | 5.2     | 5.9            | 7.3     |
| 855 | DESOXYPEGANINE HYDROCHLORIDE                              | BRD-K13819402-003-06-0 | -6.1              | 2.4     | -4.0    | 22.2    | 6.5            | 13.8    |
| 856 | VARDENAFIL HYDROCHLORIDE                                  | BRD-K13926615-003-02-5 | -8.8              | -15.3   | -5.5    | 1.8     | 5.3            | 17.4    |
| 857 | DEXPROPRANOLOL HYDROCHLORIDE                              | BRD-K13994703-003-10-9 | 6.2               | 18.2    | -13.0   | 27.1    | 15.2           | 5.0     |
| 858 | SULFAMONOMETHOXINE                                        | BRD-K14116214-001-07-0 | 8.5               | 2.3     | -27.4   | 25.2    | 33.7           | 17.4    |
| 859 | ISOPROPAMIDE IODIDE                                       | BRD-K14127446-005-15-1 | -34.5             | 12.9    | -9.3    | -8.6    | 15.0           | 15.7    |
| 860 | AG 556                                                    | BRD-K14441456-001-01-2 | 11.4              | 7.1     | -50.5   | -52.1   | -52.0          | -50.9   |
| 861 | VERATRIC ACID                                             | BRD-K14520048-001-04-2 | -3.4              | -13.9   | 22.1    | 25.8    | 9.9            | 18.6    |
| 862 | IKK 16                                                    | BRD-K14618467-003-01-8 | -59.1             | -67.3   | -78.2   | -77.6   | -57.4          | -62.0   |
| 863 | CINCHONINE                                                | BRD-K14693417-001-03-2 | -7.0              | -2.1    | -6.5    | -0.5    | 11.7           | 3.6     |
| 864 | CINOXACIN                                                 | BRD-K14704277-001-15-0 | 7.5               | 36.0    | -8.7    | 14.7    | 11.2           | -0.5    |
| 865 | SULFATHIAZOLE                                             | BRD-K14705039-001-08-1 | -1.6              | 7.1     | -43.9   | -2.3    | 12.6           | -15.4   |
| 866 | SPIRAMYCIN                                                | BRD-K14716343-001-03-0 | 18.7              | 9.0     | 6.8     | 13.5    | 13.7           | 21.2    |
| 867 | SC 560                                                    | BRD-K14767410-001-01-5 | 19.4              | 9.8     | -17.8   | -3.9    | 8.7            | 7.5     |
| 868 | Berberine                                                 | BRD-K14796088-003-17-7 | 65.8              | 54.0    | -12.0   | -6.6    | 4.3            | 1.0     |
| 869 | SB 221284                                                 | BRD-K14807180-001-01-7 | -3.4              | -6.2    | 14.2    | 13.1    | 9.0            | 9.8     |
| 870 | FCCP                                                      | BRD-K14821540-001-03-9 | -22.2             | 6.6     | -33.5   | -29.6   | -36.6          | -41.8   |
| 871 | METHYL-6,7-DIMETHOXY-4-ETHYL-beta-CARBOLINE-3-CARBOXYLATE | BRD-K14844937-001-01-6 | -15.8             | -14.2   | -11.4   | -8.2    | -55.7          | -48.9   |

| no. | Compound<br>Name                              | Broad Institute ID     | Normalized scores |         |         |         |                |         |
|-----|-----------------------------------------------|------------------------|-------------------|---------|---------|---------|----------------|---------|
|     |                                               |                        | HPr+ DNA          |         | CBA     |         | Amplex Red_HRP |         |
|     |                                               |                        | Plate 1           | Plate 2 | Plate 1 | Plate 2 | Plate 1        | Plate 2 |
| 872 | ERYTHROSINE SODIUM                            | BRD-K14920963-304-01-9 | 345.1             | 318.1   | -3.3    | -9.8    | -5.0           | -33.0   |
| 873 | JNJ 10191584 maleate                          | BRD-K15086322-103-01-0 | -10.4             | -8.3    | 2.7     | 21.4    | 7.1            | 21.5    |
| 874 | Apoptosis Activator 2                         | BRD-K15164005-001-02-3 | -30.3             | -6.1    | -27.2   | -38.7   | -33.1          | -23.8   |
| 875 | 5-HYDROXY-2',4',7,8-TETRAMETHOXYFLAVONE       | BRD-K15179660-001-01-9 | 4.1               | 24.5    | -35.0   | -1.6    | -32.6          | -28.4   |
| 876 | IBC 293                                       | BRD-K15196155-001-01-5 | 35.2              | 34.8    | 5.3     | -13.0   | 9.9            | 2.3     |
| 877 | MUPIROCIN                                     | BRD-K15262564-001-06-9 | 18.5              | 12.7    | 13.7    | 27.5    | 19.2           | 15.2    |
| 878 | PENFLURIDOL                                   | BRD-K15409150-001-01-7 | -37.7             | -30.9   | -63.5   | -62.7   | -49.4          | -51.0   |
| 879 | 1-[1-(2-BENZO[b]THIENYL)CYCLOHEXYL]PIPERIDINE | BRD-K15519488-001-01-6 | -12.7             | -4.7    | -6.8    | -24.3   | -8.4           | -26.2   |
| 880 | Cinanserin hydrochloride                      | BRD-K15522385-003-01-0 | 7.3               | 17.1    | -17.0   | -10.5   | 11.9           | 8.0     |
| 881 | PHLORETIN                                     | BRD-K15563106-001-10-7 | -22.7             | -11.1   | -19.3   | -29.0   | 5.9            | 5.0     |
| 882 | PAPAVERINE HYDROCHLORIDE                      | BRD-K15567136-003-18-1 | 25.4              | 14.1    | -12.5   | -14.2   | 17.7           | 6.0     |
| 883 | R-96544 hydrochloride                         | BRD-K15588452-003-01-9 | -37.4             | -45.9   | -92.1   | -94.4   | -60.1          | -64.4   |
| 884 | SEW 2871                                      | BRD-K15601958-001-01-3 | 17.9              | 39.3    | 4.9     | 12.1    | 5.7            | 11.0    |
| 885 | CCCP                                          | BRD-K15616905-001-01-5 | -3.3              | -10.2   | 28.0    | 32.6    | 6.9            | -2.3    |
| 886 | FLUPERLAPINE                                  | BRD-K15715913-001-01-5 | -37.9             | -21.4   | -33.1   | -37.9   | -21.2          | -32.9   |
| 887 | L-733,060 hydrochloride                       | BRD-K15791587-003-01-7 | -25.5             | -20.6   | -69.1   | -71.2   | -18.2          | -26.4   |
| 888 | LOBENDAZOLE                                   | BRD-K15834839-001-01-5 | 2.7               | 1.8     | 3.5     | 12.3    | 8.3            | 4.1     |
| 889 | SDZ 205-557 hydrochloride                     | BRD-K15868788-003-02-8 | -4.6              | 3.1     | 23.8    | 13.0    | 13.7           | 7.4     |
| 890 | CLOTTRIMAZOLE                                 | BRD-K15916496-001-14-7 | -46.2             | -51.5   | -92.6   | -96.8   | -48.9          | -33.8   |
| 891 | ANTHRAQUINONE                                 | BRD-K15957397-001-03-4 | -6.6              | -2.7    | -0.5    | -8.2    | 8.6            | 9.8     |
| 892 | OXYMETAZOLINE HYDROCHLORIDE                   | BRD-K16195444-003-16-1 | -13.6             | 6.0     | 23.1    | 34.3    | -15.7          | -10.1   |
| 893 | Ibudilast                                     | BRD-K16444452-001-03-4 | -0.6              | -0.6    | 23.0    | 16.0    | 28.3           | 25.8    |
| 894 | METACETAMOL                                   | BRD-K16474819-001-05-4 | -3.8              | 1.2     | 13.7    | 19.9    | -2.3           | 10.1    |
| 895 | MGCD-0103                                     | BRD-K16485616-001-04-8 | 10.3              | 9.8     | -22.1   | 17.4    | -4.7           | 3.2     |
| 896 | GALANGIN                                      | BRD-K16503581-001-04-9 | 34.1              | 44.6    | -26.9   | -21.4   | -37.3          | -37.3   |
| 897 | PNU 22394 hydrochloride                       | BRD-K16551401-003-02-6 | -11.8             | -12.9   | -0.5    | 4.6     | -9.6           | -5.3    |
| 898 |                                               | BRD-K16598630-001-05-7 | 30.6              | 20.2    | 17.2    | 11.3    | 17.9           | 7.4     |
| 899 | TRIMETHADIONE                                 | BRD-K16606819-001-07-7 | 6.5               | 0.3     | -7.4    | 8.7     | 20.2           | 14.5    |
| 900 | GTP 14564                                     | BRD-K16664969-001-02-5 | -13.1             | 3.6     | -41.3   | -27.9   | -4.8           | 4.1     |
| 901 | (R)-(+)-Bay K 8644                            | BRD-K16695519-001-01-6 | 27.6              | 51.5    | 4.6     | 9.5     | 20.2           | 22.7    |
| 902 | CHLOROXINE                                    | BRD-K17075857-001-06-9 | 41.0              | 31.7    | 4.3     | 12.2    | -24.9          | -23.1   |
| 903 | CHLOROXYLENOL                                 | BRD-K17223896-001-06-8 | 14.5              | 25.5    | 24.7    | 24.3    | -4.1           | 3.1     |
| 904 | 5,7-DIHYDROXY-4-METHYLCOUMARIN                | BRD-K17275330-001-03-9 | 1.4               | 67.2    | 116.3   | 102.3   | -3.3           | -14.1   |
| 905 | Tyrphostin B44, (+) enantiomer                | BRD-K17415526-001-02-7 | -3.4              | -12.8   | -44.8   | -47.8   | -41.4          | -43.0   |
| 906 | Butein                                        | BRD-K17497770-001-01-0 | -21.6             | -11.5   | -15.4   | -12.9   | -35.4          | -37.0   |
| 907 | Alsterpaullone                                | BRD-K17516382-001-02-5 | -0.6              | -9.5    | -23.0   | -2.9    | 6.4            | 13.6    |
| 908 | AMIODARONE HYDROCHLORIDE                      | BRD-K17561142-003-16-8 | -73.1             | -81.9   | -95.3   | -93.3   | -69.2          | -66.3   |
| 909 | PRIDINOL METHANESULFONATE                     | BRD-K17565903-066-15-7 | 5.1               | -15.7   | 5.6     | -1.1    | 8.1            | 9.8     |
| 910 | DECOQUINATE                                   | BRD-K17641316-001-01-4 | 5.4               | 23.1    | 10.6    | 31.5    | 21.2           | 13.7    |
| 911 | N-[2-(Acetoxy)ethyl]-3-pyridinecarboxamide    | BRD-K17693482-001-03-9 | 10.8              | -9.1    | 4.8     | 32.6    | 17.5           | 18.2    |
| 912 | DEMETHYLNIBILETIN                             | BRD-K17726681-001-01-0 | -15.2             | -24.1   | -79.1   | -64.3   | -53.2          | -53.4   |
| 913 | KB-R7943 mesylate                             | BRD-K17743697-066-02-8 | -20.6             | -11.4   | -74.5   | -76.5   | -41.7          | -42.8   |
| 914 | JWH 015                                       | BRD-K17796732-001-02-0 | 26.7              | 33.7    | 9.1     | 6.9     | 23.3           | 18.9    |
| 915 | Tranilast                                     | BRD-K17849083-001-03-0 | -14.5             | -5.2    | 0.7     | -7.9    | 26.6           | 31.6    |
| 916 | (?)-Cloprostenol sodium salt                  | BRD-K17850764-236-03-6 | -5.9              | 11.7    | 17.7    | 13.6    | 30.4           | 38.6    |
| 917 | BRL 54443                                     | BRD-K17868609-001-02-7 | 31.4              | 28.9    | 2.8     | 12.6    | -18.6          | -21.2   |

| no. | Compound<br>Name                              | Broad Institute ID     | Normalized scores |         |         |         |                |         |
|-----|-----------------------------------------------|------------------------|-------------------|---------|---------|---------|----------------|---------|
|     |                                               |                        | HPr+ DNA          |         | CBA     |         | Amplex Red_HRP |         |
|     |                                               |                        | Plate 1           | Plate 2 | Plate 1 | Plate 2 | Plate 1        | Plate 2 |
| 918 | 2-Pyridylethylamine dihydrochloride           | BRD-K17874705-300-02-4 | 0.8               | -7.4    | 15.9    | 22.4    | 16.1           | 13.7    |
| 919 | OXELAIDIN CITRATE                             | BRD-K17977438-048-01-6 | 7.4               | 2.9     | 0.4     | -7.5    | 9.0            | 6.4     |
| 920 | ETHOXZOLAMIDE                                 | BRD-K18131774-001-10-1 | 6.5               | 11.2    | -27.7   | 4.5     | -1.7           | -11.6   |
| 921 | MEPHENTERMINE SULFATE                         | BRD-K18194590-065-05-6 | 5.8               | 4.4     | -3.6    | -4.5    | -3.4           | 6.3     |
| 922 | O-1918                                        | BRD-K18316707-001-01-9 | 11.4              | -4.0    | 15.8    | 1.4     | 17.1           | 27.2    |
| 923 | BERGENIN                                      | BRD-K18550767-002-01-8 | -10.3             | 5.9     | -26.9   | 13.8    | 0.2            | 1.7     |
| 924 | Cimetidine                                    | BRD-K18618618-001-01-6 | 20.6              | 1.0     | -2.5    | 19.8    | 8.6            | 20.1    |
| 925 | FOLIC ACID                                    | BRD-K18673820-001-07-2 | -2.0              | 16.7    | 27.6    | 80.0    | 22.7           | 18.1    |
| 926 | Bifemelane hydrochloride                      | BRD-K18779551-003-03-7 | -21.1             | -14.1   | -53.7   | -55.9   | -25.8          | -28.3   |
| 927 | BAY 59-3074                                   | BRD-K18799075-001-01-0 | -17.1             | -6.9    | -4.0    | -18.8   | -18.1          | -6.1    |
| 928 | L-694,247                                     | BRD-K18816859-001-01-4 | 0.1               | 0.7     | 3.4     | 20.6    | 17.3           | 18.0    |
| 929 | NEOSTIGMINE BROMIDE                           | BRD-K18922609-004-14-0 | -4.4              | -12.3   | 28.5    | 17.2    | -4.8           | 15.4    |
| 930 | CLOFIBRIC ACID                                | BRD-K19111024-001-10-0 | 3.6               | -3.6    | -45.2   | -17.2   | -6.1           | 4.4     |
| 931 | PHENOLPHTHALEIN                               | BRD-K19227686-001-12-9 | -19.4             | -2.8    | -76.6   | -78.1   | -34.1          | -40.0   |
| 932 | SALVINORIN A                                  | BRD-K19284129-001-01-8 | 6.3               | 4.8     | 11.7    | 36.0    | 17.9           | 20.3    |
| 933 | GOSSYPOL                                      | BRD-K19295594-001-10-1 | 1.0               | 30.6    | -96.9   | -92.4   | -75.4          | -77.9   |
| 934 | CNQX                                          | BRD-K19438463-001-02-2 | -16.6             | 7.1     | 15.0    | 8.6     | 11.3           | 7.4     |
| 935 | BUFLOMEDIL HYDROCHLORIDE                      | BRD-K19462402-003-13-9 | 24.0              | 4.0     | 9.5     | 12.1    | 12.1           | 11.1    |
| 936 | Ozagrel hydrochloride                         | BRD-K19525698-003-01-1 | 24.2              | 28.2    | -1.2    | 29.6    | 24.2           | 22.5    |
| 937 | ZM 241385                                     | BRD-K19605405-001-01-9 | -47.9             | -40.1   | -59.4   | -56.9   | -50.4          | -49.1   |
| 938 | PECTOLINARIN                                  | BRD-K20043699-001-03-1 | 40.6              | 35.7    | -13.8   | 8.6     | -27.8          | -31.5   |
| 939 | Impentamine dihydrobromide                    | BRD-K20049318-303-01-3 | -5.6              | 10.0    | 24.6    | 22.3    | 27.1           | 16.1    |
| 940 | Tomoxetine hydrochloride                      | BRD-K20141153-003-03-8 | -10.0             | -20.5   | -15.3   | -14.3   | -8.1           | 0.8     |
| 941 | CEAROIN                                       | BRD-K20420220-001-03-9 | 51.2              | 60.6    | 5.6     | 52.9    | -33.3          | -48.0   |
| 942 | BENZOYLPAS                                    | BRD-K20431737-001-04-0 | -13.5             | 4.6     | -28.0   | 5.7     | -13.1          | -3.8    |
| 943 | cjd-pdi-3                                     | BRD-K20482099-341-01-1 | 25.9              | 20.7    | -12.5   | -6.0    | -32.7          | -30.3   |
| 944 | 2-METHOXYRESORCINOL                           | BRD-K20559594-001-03-2 | 24.6              | 45.4    | 14.6    | 28.9    | -6.3           | -4.0    |
| 945 | MEFEXAMIDE                                    | BRD-K20655524-003-07-0 | -10.8             | 3.4     | -21.5   | -3.6    | 11.1           | 21.8    |
| 946 | RS 56812 hydrochloride                        | BRD-K20714604-003-01-1 | 4.6               | -7.9    | 6.0     | 10.0    | 25.8           | 32.4    |
| 947 | RS 39604 hydrochloride                        | BRD-K20742498-003-01-1 | -87.2             | -89.0   | -124.8  | -122.7  | -72.5          | -75.8   |
| 948 | CROMOLYN SODIUM                               | BRD-K20920669-304-06-7 | -25.7             | 7.1     | -4.0    | -1.6    | -2.3           | -3.3    |
| 949 | beta-NAPHTHOL                                 | BRD-K21164796-001-01-0 | 9.6               | -8.6    | -48.8   | -33.8   | -72.3          | -76.1   |
| 950 | Riluzole hydrochloride                        | BRD-K21283037-003-06-2 | -14.1             | -9.4    | -52.2   | 21.1    | -51.9          | 13.1    |
| 951 | BENZTHIAZIDE                                  | BRD-K21450440-001-08-8 | -12.8             | 0.8     | -10.7   | 0.7     | 17.5           | 14.7    |
| 952 | SULFACETAMIDE                                 | BRD-K21520694-001-12-3 | 2.3               | 12.9    | 11.9    | 32.8    | 29.3           | 20.8    |
| 953 | XYLAZINE                                      | BRD-K21565985-001-15-9 | -0.8              | 9.3     | 24.5    | 31.5    | 15.2           | 30.5    |
| 954 | MITOXANTRONE HYDROCHLORIDE                    | BRD-K21680192-300-09-4 | -110.6            | -105.6  | -104.1  | -103.9  | -84.0          | -82.2   |
| 955 | ROFECOXIB                                     | BRD-K21733600-001-06-7 | 2.2               | 0.0     | -11.0   | -2.7    | 8.7            | 4.8     |
| 956 | 2,4-DINITROPHENOL                             | BRD-K21910317-001-06-5 | -6.6              | 1.1     | -6.2    | -3.8    | -11.5          | 6.3     |
| 957 | FLUORESCIN                                    | BRD-K21913543-001-01-6 | 298.5             | 333.8   | -50.7   | -17.0   | 9.7            | 1.3     |
| 958 | DIFLUNISAL                                    | BRD-K22031190-001-13-7 | -7.9              | 1.2     | -26.9   | -24.4   | 0.5            | -6.9    |
| 959 | 1-(2-hydroxy-4-morpholin-4-yl-phenyl)ethanone | BRD-K22160761-001-01-8 | 0.2               | -17.9   | 18.7    | 19.3    | 35.3           | 29.8    |
| 960 | DIOXYBENZONE                                  | BRD-K22193694-001-08-6 | 5.3               | 16.0    | -34.3   | -19.7   | 4.0            | 1.7     |
| 961 | LY 303511                                     | BRD-K22385716-001-01-7 | -6.0              | -2.7    | 17.5    | 17.2    | 23.3           | 16.7    |
| 962 | RETINOL                                       | BRD-K22429181-001-06-8 | 16.5              | 11.8    | -1.4    | -0.7    | 5.3            | 3.4     |
| 963 | IRIDIN                                        | BRD-K22550622-001-03-5 | 27.2              | 16.8    | 0.7     | 31.2    | 4.1            | -5.2    |

| no.  | Compound<br>Name                    | Broad Institute ID     | Normalized scores |         |         |         |                |         |
|------|-------------------------------------|------------------------|-------------------|---------|---------|---------|----------------|---------|
|      |                                     |                        | HPr+ DNA          |         | CBA     |         | Amplex Red_HRP |         |
|      |                                     |                        | Plate 1           | Plate 2 | Plate 1 | Plate 2 | Plate 1        | Plate 2 |
| 964  | HIERACIN                            | BRD-K22585547-001-03-3 | 83.6              | 128.3   | -18.0   | -8.0    | -38.1          | -56.9   |
| 965  | 2-BFI hydrochloride                 | BRD-K22745370-003-01-5 | -4.0              | -11.3   | 18.7    | 9.0     | 11.0           | 3.9     |
| 966  | CHRYSIN                             | BRD-K22861715-001-12-5 | 23.1              | 4.9     | -14.3   | -15.0   | -21.9          | -18.0   |
| 967  | DIPHENYLPYRALINE HYDROCHLORIDE      | BRD-K22936972-003-15-2 | -14.7             | 24.4    | 0.6     | 4.7     | 1.6            | -9.5    |
| 968  | CHLORAMPHENICOL                     | BRD-K22969690-001-03-4 | -2.7              | 3.0     | -35.9   | -19.5   | 9.4            | 2.0     |
| 969  | RHOIFOLIN                           | BRD-K23327891-001-03-1 | 9.6               | 3.6     | 20.6    | -1.2    | 20.8           | 15.2    |
| 970  | AMN 082 dihydrochloride             | BRD-K23335153-300-01-7 | -2.2              | 24.3    | 51.8    | 61.9    | 44.5           | 48.7    |
| 971  | T 0901317                           | BRD-K23383398-001-01-6 | -7.8              | 2.1     | -21.2   | -16.1   | -0.1           | -2.5    |
| 972  | SL 327                              | BRD-K23432132-001-01-2 | -15.2             | -7.7    | 31.1    | -1.4    | 1.8            | 21.0    |
| 973  | Dimaprit 2HCl                       | BRD-K23541596-300-05-6 | 0.1               | -5.8    | 5.5     | -1.0    | 4.8            | 8.7     |
| 974  | NILUTAMIDE                          | BRD-K23566484-001-09-4 | -17.2             | -5.5    | -35.9   | 6.9     | -5.9           | -10.8   |
| 975  | DFB                                 | BRD-K23623876-001-01-6 | 5.1               | 5.8     | 15.0    | 9.1     | 15.5           | 25.7    |
| 976  | 3,4'-DIMETHOXYFLAVONE               | BRD-K23644387-001-01-4 | 13.0              | 11.2    | 13.3    | 33.6    | 12.6           | 16.0    |
| 977  | 3,4-Dichloroisocoumarin             | BRD-K23704908-001-02-4 | -12.9             | 11.5    | -0.9    | 4.4     | 23.8           | 14.0    |
| 978  | COUMARIN                            | BRD-K23913458-001-13-2 | 7.9               | 6.1     | 14.4    | 9.7     | 17.6           | 21.6    |
| 979  | Arecaidine propargyl ester tosylate | BRD-K23922020-075-01-1 | -32.2             | -15.6   | -1.9    | -8.1    | 0.4            | 10.4    |
| 980  | DEXTROMETHORPHAN HYDROBROMIDE       | BRD-K24053527-004-03-8 | -7.9              | -5.8    | -1.6    | -4.5    | -1.0           | -7.0    |
| 981  | PARAXANTHINE                        | BRD-K24084088-001-06-3 | 7.2               | -1.6    | -13.9   | -12.5   | -10.8          | -2.8    |
| 982  | SB 269970 hydrochloride             | BRD-K24201553-003-02-4 | 1.4               | -11.5   | 16.9    | -2.2    | 3.0            | 4.3     |
| 983  | GYKI 52466 hydrochloride            | BRD-K24240364-003-02-1 | 15.2              | 0.5     | -12.4   | -10.8   | -0.3           | 15.7    |
| 984  | HELICIN                             | BRD-K24265569-001-01-7 | 7.3               | 2.9     | -21.9   | 0.7     | 8.2            | -1.3    |
| 985  | Leveromakalim                       | BRD-K24526313-001-08-6 | 5.8               | -19.4   | 3.7     | 0.9     | 5.6            | 5.5     |
| 986  | PROCAINE HYDROCHLORIDE              | BRD-K24616672-003-10-2 | -7.1              | -1.8    | 1.2     | 30.3    | 15.3           | -7.0    |
| 987  | ACTINONIN                           | BRD-K24621118-001-03-3 | 12.3              | 0.3     | -40.4   | -12.6   | -8.9           | -12.1   |
| 988  | LY 288513                           | BRD-K24675965-001-02-5 | 32.4              | 31.1    | 21.3    | 22.6    | -29.3          | -19.3   |
| 989  | 3-Bromo-7-nitroindazole             | BRD-K24689407-001-05-5 | -15.7             | -0.8    | -1.8    | 13.3    | 8.5            | 1.1     |
| 990  | ETHACRIDINE LACTATE                 | BRD-K24715592-043-01-4 | 45.2              | 27.8    | 38.4    | 30.1    | -9.4           | -6.3    |
| 991  | EPIAFZELECHIN TRIMETHYL ETHER       | BRD-K25064302-001-03-1 | 16.9              | 5.2     | -33.8   | -20.1   | -11.8          | -7.2    |
| 992  | 1-BCP                               | BRD-K25140590-001-02-2 | -8.6              | -8.7    | 81.3    | 104.5   | 13.4           | 17.8    |
| 993  | TANGERITIN                          | BRD-K25186396-001-04-7 | 16.8              | -4.4    | 29.9    | 34.1    | -8.3           | -10.8   |
| 994  | PIRENPERONE                         | BRD-K25224017-001-15-1 | 1.9               | -0.3    | -11.8   | 6.7     | 3.0            | 10.8    |
| 995  | OXAPROZIN                           | BRD-K25394294-001-08-1 | 4.1               | 0.5     | -10.5   | -18.3   | 4.0            | 9.8     |
| 996  | MAPROTILINE HYDROCHLORIDE           | BRD-K25433859-003-14-8 | -1.3              | -14.8   | -63.7   | -63.3   | -30.3          | -24.7   |
| 997  | 2-Iodomelatonin                     | BRD-K25649279-001-01-2 | -14.2             | -8.7    | 8.5     | -7.7    | 4.4            | 1.6     |
| 998  | PHYSOSTIGMINE SALICYLATE            | BRD-K25650355-059-12-2 | 7.1               | 9.5     | 11.1    | 2.2     | 9.0            | 14.5    |
| 999  | METHYL ROBUSTONE                    | BRD-K25811799-001-03-5 | -23.5             | -46.3   | -47.5   | -36.9   | 6.1            | 4.9     |
| 1000 | SC-9                                | BRD-K25875056-001-01-2 | 2.0               | -19.7   | 24.0    | 8.9     | -9.8           | -5.5    |
| 1001 | Immepip dihydrobromide              | BRD-K25906698-303-01-9 | 17.1              | 3.3     | 8.9     | 9.5     | 19.4           | 18.3    |
| 1002 | GRAMINE                             | BRD-K26005076-001-06-0 | -57.3             | 5.1     | -32.9   | 9.7     | 13.7           | 12.9    |
| 1003 | RS 45041-190 hydrochloride          | BRD-K26160755-003-01-8 | -0.8              | 13.9    | -11.4   | 18.5    | -1.4           | -2.5    |
| 1004 | SC-514                              | BRD-K26373640-001-02-8 | 23.9              | 39.2    | 22.7    | 12.8    | 22.2           | 18.4    |
| 1005 | EUPARIN                             | BRD-K26383086-001-03-6 | 29.8              | -2.6    | -37.3   | -11.5   | -16.3          | -19.1   |
| 1006 | J 104129 fumarate                   | BRD-K26429091-051-01-9 | 11.2              | 3.3     | 5.4     | 0.5     | 18.0           | 20.1    |
| 1007 | DMAB-anabaseine dihydrochloride     | BRD-K26573499-300-01-3 | 1.0               | -6.8    | 18.6    | 6.7     | 11.5           | 11.8    |
| 1008 |                                     | BRD-K26657438-001-01-2 | -4.8              | 9.9     | 22.4    | 22.1    | 23.4           | 34.9    |
| 1009 | PIPAMPERONE                         | BRD-K26801045-001-01-1 | -2.5              | 2.8     | 25.6    | 22.6    | 15.4           | 19.5    |

| no.  | Compound<br>Name                                                                 | Broad Institute ID     | Normalized scores |         |         |         |                |         |
|------|----------------------------------------------------------------------------------|------------------------|-------------------|---------|---------|---------|----------------|---------|
|      |                                                                                  |                        | HPr+ DNA          |         | CBA     |         | Amplex Red_HRP |         |
|      |                                                                                  |                        | Plate 1           | Plate 2 | Plate 1 | Plate 2 | Plate 1        | Plate 2 |
| 1010 | AKLOMIDE                                                                         | BRD-K26807903-001-03-5 | 12.7              | 3.3     | -9.8    | -8.3    | -5.3           | -1.7    |
| 1011 | PROTOPORPHYRIN IX                                                                | BRD-K26813314-001-04-4 | 1.1               | 7.4     | -26.7   | 3.6     | 13.0           | 27.6    |
| 1012 | Costunolide                                                                      | BRD-K26833429-001-01-0 | -11.2             | -20.9   | -50.9   | -8.6    | -15.4          | -13.6   |
| 1013 | 3-HYDROXYPHENETHYLAMINE                                                          | BRD-K26842203-001-01-3 | 1.6               | -5.4    | 10.6    | -6.3    | -2.2           | 0.3     |
| 1014 | DIOSMETIN                                                                        | BRD-K26862302-001-03-7 | 10.8              | 6.8     | -14.7   | -28.8   | -35.4          | -38.3   |
| 1015 | 3-ACETYLCOUMARIN                                                                 | BRD-K26954192-001-06-8 | 3.0               | 3.8     | -15.3   | -15.4   | 3.8            | -2.1    |
| 1016 | SB 203186 hydrochloride                                                          | BRD-K27141178-003-02-4 | -5.5              | -2.1    | -4.0    | 19.1    | 12.7           | 8.2     |
| 1017 | SR 11302                                                                         | BRD-K27216882-001-01-7 | -4.8              | -5.6    | -51.2   | -21.5   | -16.2          | -21.8   |
| 1018 | BUTAMBEN                                                                         | BRD-K27217864-001-15-7 | 2.9               | 5.2     | 1.1     | 24.9    | -0.6           | 6.8     |
| 1019 | H 89 dihydrochloride                                                             | BRD-K27737647-300-01-4 | -35.2             | -47.5   | -87.3   | -88.4   | -75.7          | -83.7   |
| 1020 | (-)-[3R,4S]-Chromanol 293B                                                       | BRD-K27911943-001-01-0 | -0.4              | -2.5    | 22.2    | 32.8    | 31.0           | 23.2    |
| 1021 | XANTHYLETIN                                                                      | BRD-K28108221-001-07-2 | 35.2              | 8.2     | 74.8    | 80.2    | 0.2            | 4.5     |
| 1022 | WEB 2086                                                                         | BRD-K28115081-001-01-9 | 3.0               | -6.4    | -8.0    | 2.4     | 2.6            | 1.0     |
| 1023 | Loreclezole hydrochloride                                                        | BRD-K28137194-003-01-3 | -4.0              | 11.9    | -22.4   | -19.8   | 2.7            | 2.8     |
| 1024 | CYPROHEPTADINE HYDROCHLORIDE                                                     | BRD-K28143534-003-14-3 | -24.0             | -14.6   | -80.0   | -78.9   | -50.2          | -57.6   |
| 1025 | CHLOROQUANIDE HYDROCHLORIDE                                                      | BRD-K28183345-003-07-2 | 8.1               | -12.3   | -4.0    | -0.5    | 6.1            | 14.7    |
| 1026 | Demethylasterriquinone B1                                                        | BRD-K28452984-001-01-4 | -59.9             | -67.5   | -105.7  | -103.1  | -88.1          | -85.7   |
| 1027 | Nitrocaramiphen hydrochloride                                                    | BRD-K28453807-003-05-4 | -15.2             | -6.2    | -0.9    | -0.6    | 8.7            | 12.6    |
| 1028 | SULFAMETHOXAZOLE                                                                 | BRD-K28494619-001-15-9 | -2.9              | 1.8     | 21.7    | 33.5    | 9.0            | 13.5    |
| 1029 | BENZYLAMINE HYDROCHLORIDE                                                        | BRD-K28542495-003-07-7 | -21.0             | -13.4   | -74.9   | -66.7   | -14.5          | -28.9   |
| 1030 | Cilostamide                                                                      | BRD-K28578425-001-02-1 | 33.2              | 22.1    | 3.6     | 27.3    | 12.6           | 15.8    |
| 1031 | METHYL-beta-CARBOLINE-3-CARBOXYLATE                                              | BRD-K28680267-001-01-8 | -4.0              | -18.4   | -16.1   | -10.1   | -12.3          | -16.6   |
| 1032 | ANTIAROL                                                                         | BRD-K28698314-001-02-1 | -3.7              | 3.1     | -64.3   | -10.5   | -50.8          | -43.7   |
| 1033 | PNU 282987                                                                       | BRD-K28863208-001-01-2 | -3.9              | 2.1     | 10.9    | 17.7    | 18.6           | 19.1    |
| 1034 | KETOTIFEN FUMARATE                                                               | BRD-K28936863-051-18-1 | -30.9             | -19.4   | -39.3   | -40.7   | -5.2           | -10.9   |
| 1035 | DIPTERYXIN                                                                       | BRD-K29004214-001-01-4 | -2.6              | -3.9    | 43.3    | 23.0    | -39.0          | -39.2   |
| 1036 |                                                                                  | BRD-K29113274-001-11-9 | -29.4             | -22.7   | -71.8   | -70.2   | -46.3          | -45.2   |
| 1037 | 7-[2-TRIFLUOROMETHYL-4-(2-HYDROXYPHENYL)-1,3-DIOXAN-cis-5-YL]-HEPT-5Z-ENOIC ACID | BRD-K29133151-001-02-4 | -2.4              | -4.0    | -4.8    | -1.1    | 10.9           | 18.2    |
| 1038 | THIRAM                                                                           | BRD-K29254801-001-06-3 | -56.9             | -59.9   | 18.5    | 17.7    | -66.2          | -69.6   |
| 1039 |                                                                                  | BRD-K29359156-001-23-6 | -30.5             | -19.5   | -87.6   | -93.1   | -61.3          | -59.9   |
| 1040 | CHLORAMBUCIL                                                                     | BRD-K29458283-001-17-4 | 27.5              | 26.6    | 10.8    | 18.0    | -12.0          | -12.6   |
| 1041 | 1-Naphthyl PPI                                                                   | BRD-K29542628-001-01-3 | -6.9              | 8.4     | -28.7   | -19.0   | -1.1           | -2.1    |
| 1042 | SNC 80                                                                           | BRD-K29546239-001-01-5 | -1.5              | -10.7   | -4.9    | -13.9   | 3.5            | -5.4    |
| 1043 | SCH 202676 hydrobromide                                                          | BRD-K29562203-004-02-6 | 24.3              | -0.8    | 12.0    | 10.0    | -3.2           | -2.4    |
| 1044 | FLUNARIZINE HYDROCHLORIDE                                                        | BRD-K29582677-300-06-4 | 6.4               | 13.3    | 9.0     | 24.8    | 4.5            | -5.4    |
| 1045 | BD 1063 dihydrochloride                                                          | BRD-K29668683-300-01-4 | 2.0               | -6.3    | -5.2    | 6.7     | -0.2           | 0.8     |
| 1046 | MEBHIDROLIN NAPHTHALENESULFONATE                                                 | BRD-K29713308-077-03-3 | -1.5              | -4.1    | 30.9    | 36.7    | -18.2          | -0.5    |
| 1047 | CLOMIPHENE CITRATE                                                               | BRD-K29950728-048-08-3 | -57.8             | -57.3   | 3.5     | 0.8     | -84.7          | -88.6   |
| 1048 | ALISKIREN HEMIFUMARATE                                                           | BRD-K30020243-051-01-7 | -9.1              | -11.8   | 13.7    | 1.9     | 18.2           | 22.3    |
| 1049 | MEXAMINE                                                                         | BRD-K30197592-003-02-9 | 0.1               | -4.9    | 16.9    | 13.5    | 10.1           | 12.1    |
| 1050 | 1400W dihydrochloride                                                            | BRD-K30237152-300-01-7 | -18.9             | -20.9   | 14.3    | 4.6     | 21.4           | 24.6    |
| 1051 | CLEMASTINE                                                                       | BRD-K30240666-051-08-4 | -22.9             | -23.4   | -2.4    | 3.3     | -35.1          | -39.2   |
| 1052 | TIMOLOL MALEATE                                                                  | BRD-K30421593-050-03-1 | 2.5               | 5.5     | 5.0     | 0.3     | 13.8           | 13.8    |
| 1053 | ELLAGIC ACID                                                                     | BRD-K30466858-001-05-4 | 58.8              | 100.1   | -26.4   | -3.8    | 3.5            | -4.2    |
| 1054 | HESPERETIN                                                                       | BRD-K30553453-001-08-2 | 34.5              | -0.5    | 46.3    | 62.5    | 8.6            | 6.0     |
| 1055 | LEVOTHYROXINE                                                                    | BRD-K30685142-001-08-9 | 57.1              | 43.7    | 10.3    | 23.7    | 0.0            | -12.4   |



| no.  | Compound<br>Name                        | Broad Institute ID     | Normalized scores |         |         |         |                |         |
|------|-----------------------------------------|------------------------|-------------------|---------|---------|---------|----------------|---------|
|      |                                         |                        | HPr+ DNA          |         | CBA     |         | Amplex Red_HRP |         |
|      |                                         |                        | Plate 1           | Plate 2 | Plate 1 | Plate 2 | Plate 1        | Plate 2 |
| 1056 | SB 216641 hydrochloride                 | BRD-K30867024-003-01-7 | -46.0             | -41.3   | -96.0   | -96.1   | -74.6          | -74.5   |
| 1057 | AT-DYRK-01                              | BRD-K30984264-003-06-8 | -2.0              | -2.9    | 86.3    | 88.4    | 45.0           | 32.7    |
| 1058 | FR 122047 hydrochloride                 | BRD-K30990140-003-01-6 | -29.8             | -26.1   | -35.0   | -35.4   | -48.9          | -56.3   |
| 1059 | PURPUROGALLIN                           | BRD-K31023358-001-10-7 | 32.3              | 29.2    | 52.2    | 32.1    | -7.1           | -8.8    |
| 1060 | BMV 7378 dihydrochloride                | BRD-K31054881-300-01-3 | 5.1               | 0.3     | -6.6    | 3.7     | 10.7           | 11.1    |
| 1061 | Devazepide                              | BRD-K31238592-001-01-6 | -6.1              | -10.2   | -39.3   | -39.3   | -4.6           | -0.8    |
| 1062 | Diacylglycerol Kinase Inhibitor II      | BRD-K31273080-001-01-2 | 2.1               | -13.5   | -9.8    | -20.6   | 12.7           | 7.7     |
| 1063 | SDZ SER 082 fumarate                    | BRD-K31339597-051-01-2 | 9.3               | 7.4     | 12.0    | 21.1    | 9.1            | 11.1    |
| 1064 | 1-PHENYLBIGUANIDE HYDROCHLORIDE         | BRD-K31491153-003-04-2 | 44.0              | -15.8   | 28.5    | 18.7    | 20.1           | 28.9    |
| 1065 | Mycophenolic acid                       | BRD-K31542390-001-01-5 | 47.1              | 34.0    | 21.2    | 15.6    | 12.2           | 14.8    |
| 1066 | DAU 5884 hydrochloride                  | BRD-K31633810-003-01-0 | 4.1               | 16.5    | 6.6     | 20.0    | 21.1           | 35.8    |
| 1067 | ISOBERGAPTENE                           | BRD-K31678817-001-06-1 | -2.7              | -5.7    | 3.9     | 2.9     | 6.6            | 12.2    |
| 1068 | SULFAMETHIZOLE                          | BRD-K31682896-001-15-8 | -3.4              | -6.1    | 18.4    | 14.5    | 9.1            | 10.1    |
| 1069 | DMeOB                                   | BRD-K31699485-001-01-9 | -3.9              | -3.8    | 0.3     | 9.0     | 7.1            | 4.0     |
| 1070 | T 0070907                               | BRD-K31843556-001-01-7 | -1.2              | 1.9     | -17.4   | 3.0     | 1.9            | 13.8    |
| 1071 | CGP 71683 hydrochloride                 | BRD-K31912990-003-01-0 | -51.9             | -77.4   | -81.2   | -78.3   | -70.0          | -73.7   |
| 1072 | Oleyethanolamide                        | BRD-K31987754-001-01-2 | 0.7               | 6.9     | -12.7   | -19.5   | 15.5           | 29.5    |
| 1073 | SULFACHLORPYRIDAZINE                    | BRD-K32021043-001-09-3 | 21.1              | 17.6    | 51.2    | 46.7    | 29.8           | 31.4    |
| 1074 | temozolomide                            | BRD-K32107296-001-04-5 | 10.9              | 8.7     | 6.4     | 30.4    | 18.4           | 25.4    |
| 1075 | TOLAZAMIDE                              | BRD-K32164935-001-17-5 | 11.1              | 36.2    | 23.7    | 56.3    | -1.6           | -2.8    |
| 1076 | PRIMIDONE                               | BRD-K32247306-001-17-9 | 5.8               | -4.1    | 6.6     | 1.6     | -4.6           | -8.9    |
| 1077 | CINNARAZINE                             | BRD-K32256916-001-03-2 | -13.5             | -5.0    | 22.1    | 19.5    | -1.3           | -1.8    |
| 1078 | SULFADIAZINE                            | BRD-K32273377-001-09-6 | -1.5              | -0.5    | 10.4    | 13.5    | 4.3            | 0.0     |
| 1079 | CGP 53353                               | BRD-K32292990-001-01-0 | 23.1              | 51.8    | 55.5    | 38.6    | 12.1           | 15.0    |
| 1080 | R(-)-2,11-DIHYDROXY-10-METHOXYAPORPHINE | BRD-K32412559-001-01-7 | 55.8              | 57.5    | 23.8    | 9.6     | -18.8          | -18.7   |
| 1081 | 3,6-DIMETHOXYFLAVONE                    | BRD-K32480606-001-01-7 | 16.1              | -6.7    | 8.9     | 30.4    | 3.2            | -3.9    |
| 1082 | GBR 12909 dihydrochloride               | BRD-K32501161-300-04-7 | -13.9             | 10.2    | -30.7   | -3.9    | -25.9          | -19.4   |
| 1083 | DCEBIO                                  | BRD-K32526544-001-01-2 | -5.8              | -8.8    | -25.4   | -22.6   | -2.7           | -4.2    |
| 1084 | DIPROPYL-5CT                            | BRD-K32645441-001-01-4 | -5.6              | -9.5    | 25.9    | 17.7    | -3.8           | 13.5    |
| 1085 | 2-Aminobenzenesulfonamide               | BRD-K32681104-001-03-3 | 13.8              | 4.6     | 9.8     | 28.7    | 15.0           | 12.9    |
| 1086 | tetraethylthiuram disulfide             | BRD-K32744045-001-17-1 | -34.9             | -31.7   | -39.1   | -35.7   | -32.0          | -48.6   |
| 1087 | AZATHIOPRINE                            | BRD-K32821942-001-10-6 | -9.7              | 3.1     | 10.5    | -0.6    | 22.6           | 18.5    |
| 1088 | Guanfacine hydrochloride                | BRD-K32830106-003-11-3 | 1.2               | 4.6     | 8.7     | 32.7    | 19.9           | 18.1    |
| 1089 | EUGENOL                                 | BRD-K32977963-001-03-5 | 3.3               | -1.1    | 0.7     | 23.6    | -25.9          | -30.4   |
| 1090 | SPHONDIN                                | BRD-K33260002-001-06-1 | -19.6             | -15.9   | -2.7    | 17.0    | 32.0           | 32.7    |
| 1091 | INCA-6                                  | BRD-K33308633-001-01-6 | 1.2               | -7.0    | -108.6  | -109.5  | -85.6          | -85.5   |
| 1092 | CRYPTOTANSHINONE                        | BRD-K33336844-001-05-3 | 31.9              | 30.2    | 33.5    | 54.2    | 20.2           | 15.2    |
| 1093 | A 68930                                 | BRD-K33400588-003-01-2 | 2.8               | -4.6    | 78.1    | 84.6    | 34.1           | 36.9    |
| 1094 | meta-CRESYL ACETATE                     | BRD-K33442414-001-01-8 | 3.5               | 6.9     | 25.1    | 21.7    | 19.4           | 24.2    |
| 1095 | DTG                                     | BRD-K33459542-001-02-5 | 3.1               | 18.6    | 11.8    | 20.1    | 18.5           | 18.2    |
| 1096 |                                         | BRD-K33583600-001-03-9 | 15.0              | -6.4    | 4.9     | 1.7     | -16.6          | -17.1   |
| 1097 | Lavendustin B                           | BRD-K33781562-001-02-7 | -54.4             | -36.8   | -14.4   | -13.4   | 7.2            | 1.8     |
| 1098 | GW 3965 hydrochloride                   | BRD-K33818169-003-01-2 | -60.2             | -64.6   | -92.1   | -91.4   | -86.4          | -88.4   |
| 1099 | LY 225910                               | BRD-K33864865-001-01-7 | -3.0              | -10.6   | -5.5    | -1.1    | 1.5            | -2.5    |
| 1100 | ZK 93423                                | BRD-K33882852-003-01-0 | 7.4               | 6.3     | -11.0   | -18.9   | -10.6          | -17.7   |
| 1101 | NAPROXOL                                | BRD-K34014345-001-03-4 | -1.7              | -8.9    | -19.2   | 7.5     | -1.1           | -11.9   |

| no.  | Compound<br>Name                         | Broad Institute ID     | Normalized scores |         |         |         |                |         |
|------|------------------------------------------|------------------------|-------------------|---------|---------|---------|----------------|---------|
|      |                                          |                        | HPr+ DNA          |         | CBA     |         | Amplex Red_HRP |         |
|      |                                          |                        | Plate 1           | Plate 2 | Plate 1 | Plate 2 | Plate 1        | Plate 2 |
| 1102 | GBR 12783 dihydrochloride                | BRD-K34034388-300-01-0 | -8.9              | 12.2    | -24.0   | -9.5    | -1.9           | -4.8    |
| 1103 | Arvanil                                  | BRD-K34092021-001-02-3 | 12.4              | 8.1     | 10.3    | 11.2    | -23.7          | -21.8   |
| 1104 | DENATONIUM BENZOATE                      | BRD-K34122555-057-06-5 | 3.5               | -3.1    | 9.6     | 23.1    | 20.6           | 19.2    |
| 1105 | Tracazolate hydrochloride                | BRD-K34154330-003-04-9 | 20.2              | -6.7    | -32.0   | -4.5    | 14.2           | 1.9     |
| 1106 | Fexaramine                               | BRD-K34170797-001-01-1 | 7.0               | -10.5   | 0.9     | 8.3     | 1.4            | 12.1    |
| 1107 | METHICILLIN SODIUM                       | BRD-K34388247-236-04-1 | -22.9             | 18.6    | 23.4    | 14.3    | 10.5           | 6.0     |
| 1108 | TRIMETHOBENZAMIDE HYDROCHLORIDE          | BRD-K34415467-003-08-0 | 0.2               | 4.8     | 19.4    | 39.3    | 32.8           | 38.0    |
| 1109 | AG 494                                   | BRD-K34533029-001-01-0 | 25.5              | 5.2     | -26.6   | -36.4   | -45.5          | -41.6   |
| 1110 | TILORONE                                 | BRD-K34568562-001-03-5 | -15.9             | -21.7   | 1.1     | -16.8   | -19.9          | -19.7   |
| 1111 | GP 2a                                    | BRD-K34608650-001-01-6 | 7.7               | 6.5     | 4.9     | 35.3    | 31.7           | 30.6    |
| 1112 | 6-Chloromelatonin                        | BRD-K34663752-001-02-6 | -10.0             | -8.4    | 10.5    | 7.4     | -3.8           | -1.6    |
| 1113 | METHYLERGONOVINE MALEATE                 | BRD-K34685430-050-06-7 | 19.3              | 14.8    | 12.4    | -5.7    | 3.2            | -7.3    |
| 1114 | THEOBROMINE                              | BRD-K34888156-001-08-8 | 2.1               | 1.1     | 18.7    | 3.0     | 5.1            | 9.8     |
| 1115 | SU1498                                   | BRD-K34995470-001-03-1 | 8.8               | 5.1     | 27.7    | 19.3    | 26.7           | 9.1     |
| 1116 | 3,7-DIHYDROXYFLAVONE                     | BRD-K35133923-001-03-1 | 48.5              | -3.5    | 27.9    | 35.0    | -4.7           | 4.2     |
| 1117 |                                          | BRD-K35240538-001-11-4 | 21.9              | -1.5    | 6.7     | 33.7    | 5.9            | 8.1     |
| 1118 | SR 59230A hydrochloride                  | BRD-K35430135-003-01-5 | -7.6              | -3.8    | -33.3   | -33.1   | -28.4          | -27.0   |
| 1119 | MCI-186                                  | BRD-K35458079-001-12-5 | 17.5              | 14.2    | 20.3    | 22.1    | -2.2           | 2.6     |
| 1120 | BPIQ-II                                  | BRD-K35473459-001-01-7 | 0.4               | 4.8     | 12.4    | 23.7    | 7.0            | 21.2    |
| 1121 | ALRESTATIN                               | BRD-K35498378-001-05-3 | -4.7              | -2.1    | -5.2    | 14.1    | 20.1           | 15.7    |
| 1122 |                                          | BRD-K35520305-001-07-8 | -2.6              | 0.7     | 0.4     | 1.0     | 11.1           | 14.9    |
| 1123 | 2,6-DIHYDROXY-4-METHOXYTOLUENE           | BRD-K35568433-001-03-1 | 14.2              | -11.2   | 21.4    | 10.4    | -4.1           | -5.2    |
| 1124 | SR 27897                                 | BRD-K35629949-001-01-2 | 1.5               | 2.2     | -13.8   | -9.8    | 0.9            | 7.8     |
| 1125 | niclosamide                              | BRD-K35960502-001-11-9 | 2.7               | 6.7     | 8.5     | 20.0    | -9.5           | -11.3   |
| 1126 | NNC 63-0532                              | BRD-K36009368-001-01-8 | -3.9              | -7.0    | 12.0    | 18.1    | 11.1           | 21.2    |
| 1127 | ABT 702 dihydrochloride                  | BRD-K36021395-300-01-6 | -35.5             | -34.2   | -62.5   | -59.8   | -28.8          | -32.3   |
| 1128 | PYRITHYLDIONE                            | BRD-K36116267-001-08-8 | -10.5             | -17.1   | 33.8    | 19.9    | 9.5            | 22.7    |
| 1129 | PLUMBAGIN                                | BRD-K36137799-001-03-2 | 26.0              | 28.4    | 8.8     | 22.8    | -47.4          | -50.1   |
| 1130 | WAY 170523                               | BRD-K36198571-001-01-2 | 3.6               | -17.9   | 7.0     | 8.8     | 18.5           | 11.0    |
| 1131 | AZ 10417808                              | BRD-K36258877-001-01-5 | 5.7               | 1.2     | 4.5     | 25.5    | 15.5           | 17.7    |
| 1132 | SB 206553 hydrochloride                  | BRD-K36395411-003-01-4 | -17.4             | -16.7   | 13.3    | 17.2    | 16.1           | 25.6    |
| 1133 | AZTREONAM                                | BRD-K36547807-001-02-4 | 0.0               | -5.6    | 14.5    | -1.2    | -3.4           | 5.8     |
| 1134 | Doxepin hydrochloride                    | BRD-K36616567-003-01-5 | -8.1              | -6.9    | -35.8   | -6.6    | -3.4           | 1.4     |
| 1135 | IPRIFLAVONE                              | BRD-K36646537-001-02-1 | -2.1              | -1.3    | 10.4    | 29.8    | 14.5           | 14.0    |
| 1136 | BUFEXAMAC                                | BRD-K36660044-001-15-0 | 10.6              | 0.0     | -12.3   | -8.5    | 11.4           | -0.4    |
| 1137 | GUAIAZULENE                              | BRD-K36719159-001-04-9 | 2.6               | -0.7    | 10.5    | 12.1    | 10.0           | 11.7    |
| 1138 | ETHAVERINE HYDROCHLORIDE                 | BRD-K36756879-003-06-1 | -15.6             | -15.3   | 23.1    | 28.4    | 6.7            | 7.5     |
| 1139 | 5-alpha-PREGNANE-3-alpha-2,1-DIOL-20-ONE | BRD-K36764776-001-01-4 | -6.6              | -8.8    | 4.3     | -2.8    | -9.6           | -8.2    |
| 1140 | TRIM                                     | BRD-K36851334-001-05-5 | 10.4              | -3.2    | -20.1   | -12.1   | -3.9           | -13.6   |
| 1141 | HYDROFLUMETHIAZIDE                       | BRD-K36862742-001-15-7 | 12.7              | 3.7     | 40.4    | 20.6    | -5.9           | 10.5    |
| 1142 | BD 1047 dihydrobromide                   | BRD-K36864847-303-01-7 | -4.4              | -11.8   | -28.6   | -24.9   | -2.0           | 2.8     |
| 1143 |                                          | BRD-K36927236-001-17-7 | 11.9              | 2.4     | 10.2    | -0.3    | 11.8           | 21.6    |
| 1144 | m-Chlorophenylbiguanide hydrochloride    | BRD-K36965586-003-03-9 | 6.2               | 19.1    | 26.4    | 2.4     | 18.3           | 19.4    |
| 1145 | S-ISOCORYDINE (+)                        | BRD-K37049577-001-08-5 | 1.7               | 2.6     | 6.8     | 15.5    | -25.3          | -27.0   |
| 1146 | ASTEMIZOLE                               | BRD-K37249724-001-16-6 | -32.1             | -34.7   | 11.6    | 25.0    | -51.0          | -48.2   |
| 1147 | CLOZAPINE                                | BRD-K37289225-001-23-2 | 12.5              | 12.1    | -22.8   | -11.0   | -10.1          | -8.6    |

| no.  | Compound<br>Name                                            | Broad Institute ID     | Normalized scores |         |         |         |                |         |
|------|-------------------------------------------------------------|------------------------|-------------------|---------|---------|---------|----------------|---------|
|      |                                                             |                        | HPr+ DNA          |         | CBA     |         | Amplex Red_HRP |         |
|      |                                                             |                        | Plate 1           | Plate 2 | Plate 1 | Plate 2 | Plate 1        | Plate 2 |
| 1148 | Kenpaullone                                                 | BRD-K37312348-001-06-9 | 6.9               | -0.4    | -9.6    | 0.0     | 8.0            | 9.4     |
| 1149 | NSC 632839 hydrochloride                                    | BRD-K37392901-003-01-7 | -37.2             | -19.9   | -41.5   | -41.9   | -19.8          | -20.3   |
| 1150 | IDEBENONE                                                   | BRD-K37516142-001-01-4 | 6.9               | 14.7    | 20.2    | 25.9    | -26.0          | -29.2   |
| 1151 | Zardaverine                                                 | BRD-K37561857-001-06-4 | 41.1              | 16.4    | 28.8    | 34.1    | 25.5           | 24.9    |
| 1152 | MRS 1220                                                    | BRD-K37618799-001-01-4 | -8.1              | -9.0    | -3.7    | 1.3     | -1.1           | 10.1    |
| 1153 | PIROMIDIC ACID                                              | BRD-K37682401-001-06-9 | 18.0              | -4.1    | 6.8     | 20.8    | 10.6           | 16.7    |
| 1154 | FIPEXIDE HYDROCHLORIDE                                      | BRD-K37688416-003-08-1 | -1.5              | -1.3    | 31.4    | 39.7    | -1.1           | -3.0    |
| 1155 | ABT 724 trihydrochloride                                    | BRD-K37714784-305-01-3 | 8.0               | -9.4    | 26.1    | 22.0    | 22.4           | 11.5    |
| 1156 | Denbufylline                                                | BRD-K37792168-001-01-0 | 2.4               | -14.0   | 18.0    | 25.9    | 24.6           | 38.3    |
| 1157 |                                                             | BRD-K37798499-001-05-8 | 6.9               | 6.2     | 14.3    | 1.8     | -2.2           | -8.1    |
| 1158 | ACEPROMAZINE MALEATE                                        | BRD-K37814297-050-05-4 | -20.0             | -28.4   | 29.7    | 6.5     | -3.7           | -7.7    |
| 1159 | 3,3'-DIINDOLYLMETHANE                                       | BRD-K37846922-001-06-0 | 32.2              | 26.8    | 19.8    | 12.6    | -8.9           | -15.5   |
| 1160 | N-(4-BROMOBENZYL)-5-METHOXYTRYPTAMINE                       | BRD-K37883585-001-01-2 | -8.3              | -1.4    | -6.9    | -5.3    | 8.9            | 1.2     |
| 1161 | CAMPTOTHECIN                                                | BRD-K37890730-001-10-2 | 2.1               | 6.8     | 123.2   | 135.1   | 26.6           | 28.2    |
| 1162 | Paroxetine maleate                                          | BRD-K37991163-050-05-1 | -15.4             | -21.5   | -47.1   | -47.8   | -38.3          | -40.0   |
| 1163 | ETHAMIVAN                                                   | BRD-K38055836-001-13-8 | 18.7              | 14.3    | 15.0    | 31.8    | 1.4            | -2.1    |
| 1164 | BUMETANIDE                                                  | BRD-K38197229-001-17-4 | 9.4               | 5.4     | 12.6    | 40.8    | 26.6           | 27.0    |
| 1165 | Paxilline                                                   | BRD-K38251852-001-06-6 | -18.4             | -27.4   | 20.2    | 8.9     | -18.3          | -24.1   |
| 1166 | DOMPERIDONE                                                 | BRD-K38305202-001-08-3 | -15.6             | -11.7   | -11.9   | -10.3   | 20.0           | 16.1    |
| 1167 | PHENACETIN                                                  | BRD-K38323065-001-09-0 | -2.9              | 18.6    | -1.0    | -6.1    | 0.5            | -1.7    |
| 1168 | 8-CYCLOPENTYLTHEOPHYLLINE                                   | BRD-K38347298-001-06-4 | 5.0               | 1.7     | 6.1     | 4.8     | 25.6           | 20.7    |
| 1169 | 3-(4-Allylpiperazin-1-yl)-2-quinoxalinecarbonitrile maleate | BRD-K38370968-103-01-0 | -4.0              | -7.0    | -2.4    | 9.2     | -9.0           | 0.2     |
| 1170 | IMIPRAMINE HYDROCHLORIDE                                    | BRD-K38436528-003-15-4 | -10.1             | 2.9     | -26.0   | -8.8    | -28.9          | -32.3   |
| 1171 | Bohemine                                                    | BRD-K38622899-001-01-4 | -4.8              | 16.9    | -10.6   | -23.5   | 8.8            | 8.3     |
| 1172 | ROXITHROMYCIN                                               | BRD-K38684403-001-03-9 | 5.1               | 0.4     | 27.4    | 11.5    | 14.1           | 20.3    |
| 1173 |                                                             | BRD-K38775274-001-06-4 | -6.9              | -8.8    | 9.3     | 7.9     | 15.4           | 12.8    |
| 1174 | CINCHONIDINE                                                | BRD-K39079086-001-05-0 | 22.9              | 11.7    | 37.6    | 34.5    | 21.6           | 20.1    |
| 1175 | BITHIONATE SODIUM                                           | BRD-K39120595-304-03-9 | -27.9             | -25.5   | -94.7   | -94.5   | -69.9          | -66.4   |
| 1176 | 4-Chlorophenylguanidine hydrochloride                       | BRD-K39160765-003-01-1 | 10.3              | 20.1    | -21.5   | 4.6     | -22.0          | 3.4     |
| 1177 | R(-)-2,10,11-TRIHYDROXYAPORPHINE                            | BRD-K39187410-001-01-7 | 48.5              | 48.5    | -13.3   | -24.1   | -57.9          | -60.0   |
| 1178 | NITHIAMIDE                                                  | BRD-K39467894-001-01-8 | 1.7               | 2.8     | 37.4    | 25.9    | 23.8           | 25.7    |
| 1179 | Amthamine dihydrobromide                                    | BRD-K39670393-303-01-3 | 11.8              | 0.5     | 36.8    | 17.1    | 13.3           | 15.1    |
| 1180 | L 161982                                                    | BRD-K39733634-001-01-8 | -28.6             | -33.6   | -68.8   | -53.5   | -20.1          | -28.9   |
| 1181 | LOXAPINE SUCCINATE                                          | BRD-K39915878-036-15-2 | -5.4              | 3.1     | -18.1   | -25.0   | -7.6           | -14.5   |
| 1182 | BISACODYL                                                   | BRD-K39987650-001-15-9 | 18.8              | -10.0   | 38.2    | 36.0    | 28.4           | 16.8    |
| 1183 | TYRPHOSTIN 9                                                | BRD-K40255344-001-04-4 | -10.7             | -23.4   | -29.0   | -41.8   | -25.0          | -32.5   |
| 1184 | GR 79236                                                    | BRD-K40578143-001-01-8 | -8.8              | -7.3    | 0.0     | 12.5    | -6.6           | 8.5     |
| 1185 | LARIXINIC ACID                                              | BRD-K40619305-001-12-1 | 0.7               | 10.9    | 12.5    | 10.3    | 1.7            | -0.2    |
| 1186 | ZM 39923 hydrochloride                                      | BRD-K40624912-003-02-3 | -60.8             | -61.4   | 15.4    | 14.5    | -71.3          | -74.8   |
| 1187 | L-165,041                                                   | BRD-K40656405-001-01-5 | -36.9             | -39.1   | -80.2   | -81.4   | -30.1          | -22.0   |
| 1188 | QX 222                                                      | BRD-K40782193-003-01-1 | 10.8              | 4.3     | -0.4    | 4.7     | 7.1            | 8.3     |
| 1189 | RITANSERIN                                                  | BRD-K40887525-001-14-4 | 15.0              | -3.7    | -28.3   | -11.9   | 16.5           | 6.5     |
| 1190 | CINANSERIN                                                  | BRD-K40901640-001-01-0 | -2.2              | -2.0    | 4.8     | -4.6    | 1.1            | 0.4     |
| 1191 | PHENACEMIDE                                                 | BRD-K40905133-001-03-1 | -5.6              | -11.0   | -3.3    | 11.2    | 5.4            | 6.8     |
| 1192 | CYANOPINDOLOL                                               | BRD-K40965114-001-01-2 | 1.5               | -3.7    | -6.0    | -7.0    | -4.5           | -4.9    |
| 1193 | N,N-HEXAMETHYLENEAMILORIDE                                  | BRD-K40990712-001-02-4 | -4.1              | -18.6   | 3.1     | 1.5     | -8.8           | 12.8    |

| no.  | Compound<br>Name                                        | Broad Institute ID     | Normalized scores |         |         |         |                |         |
|------|---------------------------------------------------------|------------------------|-------------------|---------|---------|---------|----------------|---------|
|      |                                                         |                        | HPr+ DNA          |         | CBA     |         | Amplex Red_HRP |         |
|      |                                                         |                        | Plate 1           | Plate 2 | Plate 1 | Plate 2 | Plate 1        | Plate 2 |
| 1194 | PARACHLOROPHENOL                                        | BRD-K40992116-001-05-5 | 1.5               | -1.8    | 5.2     | 7.8     | -16.4          | -10.9   |
| 1195 | N20C hydrochloride                                      | BRD-K41143549-003-01-6 | -13.7             | -14.8   | -15.2   | -7.3    | 4.0            | 11.4    |
| 1196 | Fenobam                                                 | BRD-K41160163-001-01-9 | 15.4              | 9.1     | 25.9    | 35.3    | 3.5            | 6.4     |
| 1197 | ZM 306416 hydrochloride                                 | BRD-K41337261-003-01-0 | -4.9              | -7.9    | -36.0   | -25.9   | -33.5          | -22.9   |
| 1198 | SULFAPYRIDINE                                           | BRD-K41406082-001-09-7 | 3.5               | -5.9    | 9.1     | -4.5    | 1.4            | -1.9    |
| 1199 | A23187, free acid                                       | BRD-K41431477-001-05-6 | 35.4              | 28.8    | -62.7   | -76.4   | -61.1          | -68.6   |
| 1200 | BISPHENOL A                                             | BRD-K41494493-001-04-7 | 8.2               | -12.5   | 22.7    | 17.3    | -1.3           | -6.5    |
| 1201 | Acetaminophen                                           | BRD-K41524689-001-08-6 | -0.2              | 2.3     | 14.9    | 13.7    | -33.0          | -25.7   |
| 1202 | 6,2'-DIMETHOXYFLAVONE                                   | BRD-K41557448-001-01-3 | 10.9              | -0.4    | 32.8    | 23.9    | -8.7           | -3.3    |
| 1203 | Purvalanol B                                            | BRD-K41564320-001-01-2 | 4.7               | -17.6   | 26.6    | 17.2    | 27.5           | 29.0    |
| 1204 | SB 334867                                               | BRD-K41567364-001-01-2 | 11.4              | -16.3   | -45.7   | -46.5   | -19.1          | -12.2   |
| 1205 | GANGALEOIDIN                                            | BRD-K41603276-001-03-8 | -3.6              | 4.5     | 15.5    | 28.5    | -21.4          | -24.0   |
| 1206 | E-4031 dihydrochloride                                  | BRD-K41713976-300-01-8 | 12.2              | -3.8    | 2.6     | 30.8    | 11.8           | 13.4    |
| 1207 | TRICLOSAN                                               | BRD-K41731458-001-04-5 | -5.9              | -9.7    | -2.2    | 2.3     | -35.2          | -36.3   |
| 1208 | IRIGENIN, DIBENZYL ETHER                                | BRD-K41762421-001-03-6 | 7.3               | -10.2   | 20.3    | 31.6    | 7.1            | 13.4    |
| 1209 | 1,3-Dipropyl-8-phenylxanthine                           | BRD-K41853443-001-01-1 | 4.7               | 0.8     | 1.3     | -2.7    | -10.7          | -13.3   |
| 1210 | W-5 hydrochloride                                       | BRD-K41868777-003-02-9 | -1.9              | -7.9    | 0.8     | -10.8   | 4.9            | 3.1     |
| 1211 | 2-Phenylmelatonin                                       | BRD-K41869275-001-01-0 | -21.8             | -25.9   | 4.1     | 6.7     | 18.0           | 28.1    |
| 1212 | TIOXOLONE                                               | BRD-K41876534-001-06-1 | 20.0              | 55.5    | 9.6     | 15.2    | -25.3          | -30.1   |
| 1213 | Daidzein                                                | BRD-K42095107-001-08-0 | 0.9               | -9.2    | 7.1     | 24.0    | -7.9           | -11.4   |
| 1214 | PROTRYPYLINE HYDROCHLORIDE                              | BRD-K42098891-003-13-0 | -22.4             | -37.3   | 25.8    | 33.5    | -28.4          | -40.2   |
| 1215 | NNC 711                                                 | BRD-K42221274-003-02-8 | 24.8              | 14.2    | 24.4    | 15.7    | 14.7           | 14.7    |
| 1216 | CYCLOBENZAPRINE HYDROCHLORIDE                           | BRD-K42348709-003-08-1 | -38.8             | -21.2   | 30.2    | 17.1    | -36.2          | -33.9   |
| 1217 | EO 1428                                                 | BRD-K42452249-001-01-7 | -9.7              | 10.5    | -8.8    | -8.4    | -3.1           | 4.2     |
| 1218 | CGP 57380                                               | BRD-K42500029-001-01-9 | 22.3              | 38.7    | 30.6    | 47.4    | 1.6            | 10.0    |
| 1219 | 2-(1-Thienyl)ethyl 3,4-dihydroxybenzylideneacetoacetate | BRD-K42663584-001-01-2 | 20.8              | 15.0    | -31.2   | -20.9   | -30.7          | -35.7   |
| 1220 | Y-27152                                                 | BRD-K42679050-001-01-3 | 2.8               | 4.5     | -24.8   | -21.5   | -3.1           | -1.7    |
| 1221 | Glimepiride                                             | BRD-K42693031-001-01-8 | -3.1              | -11.2   | -6.8    | 9.2     | 24.6           | 18.3    |
| 1222 | XE 991 dihydrochloride                                  | BRD-K42748308-300-01-2 | 10.3              | 5.9     | -20.1   | -20.9   | 9.5            | 9.6     |
| 1223 | CFM-2                                                   | BRD-K42859542-001-02-5 | -5.6              | -6.6    | -2.1    | -7.5    | -0.4           | -1.7    |
| 1224 | PD 156273                                               | BRD-K43030839-001-01-6 | 6.4               | 1.9     | 5.0     | -0.8    | 17.6           | 19.5    |
| 1225 | AMG 9810                                                | BRD-K43068349-001-01-9 | -2.9              | -9.5    | -6.5    | -8.2    | 1.1            | 12.4    |
| 1226 | 2,5'-DIHYDROXY-4-METHOXYCHALCONE                        | BRD-K43285163-001-02-0 | 29.4              | 28.4    | 28.9    | 27.9    | -49.1          | -54.9   |
| 1227 | RO 04-6790                                              | BRD-K43290182-001-01-9 | -3.2              | -2.8    | -4.6    | 6.0     | 7.0            | 14.5    |
| 1228 | JTE 013                                                 | BRD-K43330982-001-01-5 | 15.2              | 12.1    | -8.4    | 0.6     | -34.4          | -28.1   |
| 1229 | FLOPROPIONE                                             | BRD-K43383936-001-03-7 | -12.4             | -5.0    | 32.0    | 22.9    | 43.2           | 46.9    |
| 1230 |                                                         | BRD-K43389675-003-03-5 | 15.4              | 11.1    | -16.9   | -5.7    | 8.1            | 4.2     |
| 1231 | Tamoxifen citrate                                       | BRD-K43744935-048-01-6 | -60.8             | -67.1   | -73.8   | -73.4   | -62.8          | -70.3   |
| 1232 | PSEUDO-ANISATIN                                         | BRD-K43770188-001-02-2 | 2.0               | -5.3    | 25.5    | 21.3    | 23.5           | 19.4    |
| 1233 | RLM-1-127                                               | BRD-K43796186-001-01-1 | -1.8              | -4.3    | -1.9    | -10.0   | -12.7          | -9.6    |
| 1234 | GENISTEIN                                               | BRD-K43797669-001-10-6 | -6.2              | -10.5   | 8.0     | 0.8     | 7.7            | 1.4     |
| 1235 | PENICILLIN V POTASSIUM                                  | BRD-K43966364-237-03-0 | 3.7               | -1.9    | 28.0    | 14.9    | 21.7           | 27.2    |
| 1236 | ISOSAFROLE                                              | BRD-K44005821-001-07-4 | 1.0               | -16.4   | 13.0    | -12.8   | -0.2           | 7.5     |
| 1237 | FLUFENAMIC ACID                                         | BRD-K44067360-001-16-2 | -7.8              | -4.9    | -59.0   | -67.4   | -23.8          | -27.6   |
| 1238 | Y-27632                                                 | BRD-K44084986-300-02-7 | -5.9              | -11.3   | -19.0   | -3.0    | -1.4           | 6.5     |
| 1239 | L-PHENYLALANINOL                                        | BRD-K44204252-001-04-8 | -0.6              | 1.6     | 19.5    | 8.6     | 22.5           | 26.3    |

| no.  | Compound<br>Name                  | Broad Institute ID     | Normalized scores |         |         |         |                |         |
|------|-----------------------------------|------------------------|-------------------|---------|---------|---------|----------------|---------|
|      |                                   |                        | HPr+ DNA          |         | CBA     |         | Amplex Red_HRP |         |
|      |                                   |                        | Plate 1           | Plate 2 | Plate 1 | Plate 2 | Plate 1        | Plate 2 |
| 1240 | TRYPTAMINE                        | BRD-K44218819-001-05-1 | 24.7              | 7.5     | 19.6    | 34.6    | 11.8           | 8.2     |
| 1241 | TOLNAFTATE                        | BRD-K44273375-001-14-4 | -6.9              | -15.3   | 29.8    | 37.7    | 27.2           | 32.3    |
| 1242 | (R)-(-)-Niguldipine hydrochloride | BRD-K44309363-003-01-3 | -12.3             | -10.8   | -27.5   | -20.5   | -46.2          | -44.2   |
| 1243 | N-METHYLBENZYLAMINE HYDROCHLORIDE | BRD-K44558320-003-01-7 | 3.6               | 0.2     | 8.3     | 14.5    | 11.0           | 11.1    |
| 1244 | BECLAMIDE                         | BRD-K44824027-001-01-3 | 2.4               | 0.6     | 8.4     | 11.5    | -4.3           | 4.0     |
| 1245 | S-(-)-Atenolol                    | BRD-K44993696-001-05-7 | -4.7              | 18.5    | 17.0    | 14.0    | 17.0           | 10.3    |
| 1246 | FAMCICLOVIR                       | BRD-K45033733-001-05-6 | -8.6              | -7.7    | 12.0    | 6.1     | 2.2            | -2.1    |
| 1247 | SNC-162                           | BRD-K45042519-001-01-6 | -0.1              | -4.5    | 4.5     | 6.6     | 14.3           | 9.4     |
| 1248 | W-13 hydrochloride                | BRD-K45068323-003-02-1 | -29.6             | -26.5   | -39.7   | -61.9   | -16.4          | -39.2   |
| 1249 | TETRACAINE HYDROCHLORIDE          | BRD-K45071273-003-15-7 | -4.8              | -3.2    | 38.5    | 37.7    | -11.6          | -12.5   |
| 1250 | Y-26763                           | BRD-K45117373-001-01-1 | 12.1              | 5.9     | -19.8   | 38.8    | 11.8           | 42.9    |
| 1251 | VALSARTAN                         | BRD-K45158365-001-05-6 | -7.7              | -3.4    | 23.3    | 20.4    | 15.5           | 9.8     |
| 1252 | CLOFIBRATE                        | BRD-K45252063-001-06-0 | 13.2              | 13.9    | 5.8     | 10.4    | 4.5            | 7.2     |
| 1253 | ZD 7114 hydrochloride             | BRD-K45296539-003-01-0 | -2.6              | -6.9    | -8.5    | -14.3   | 2.0            | 9.2     |
| 1254 | DIETHYLSTILBESTROL                | BRD-K45330754-001-09-2 | 6.5               | 5.1     | 32.5    | 12.1    | 2.2            | 3.2     |
| 1255 | SCH 23390 hydrochloride           | BRD-K45435259-003-03-8 | -4.6              | 2.2     | 24.3    | 29.0    | 12.3           | 16.0    |
| 1256 | 5-Methylfurmethiodide             | BRD-K45437867-005-01-7 | 7.8               | -6.9    | 3.0     | 12.0    | 24.5           | 25.5    |
| 1257 | BP 554 maleate                    | BRD-K45479396-103-01-2 | 4.2               | 20.3    | 10.9    | 23.8    | 11.4           | 5.9     |
| 1258 | Broad-PET-Sai-52                  | BRD-K45528773-001-03-1 | -8.6              | -9.3    | 3.2     | -18.5   | -1.8           | -9.0    |
| 1259 | DIETHYLCARBAMAZINE CITRATE        | BRD-K45542189-048-15-5 | -1.5              | -15.8   | 6.4     | -0.2    | 3.9            | 8.0     |
| 1260 | 3'-Fluorobenzylpiperone maleate   | BRD-K45662124-103-01-2 | -5.6              | -6.7    | -0.2    | -2.0    | -6.6           | -5.3    |
| 1261 | AZAPERONE                         | BRD-K45861246-001-08-4 | 13.2              | 3.4     | 42.6    | 8.5     | 13.6           | 24.0    |
| 1262 | AMRINONE                          | BRD-K45924332-001-07-7 | 33.5              | 39.1    | -4.5    | 14.7    | -12.0          | -12.2   |
| 1263 | LUPININE                          | BRD-K45978015-001-03-6 | -11.6             | -1.1    | 11.5    | 17.1    | 2.7            | -2.2    |
| 1264 | TMS                               | BRD-K45988865-001-01-0 | 6.2               | -7.7    | -1.9    | 11.3    | -17.8          | 31.9    |
| 1265 | BEZAFIBRATE                       | BRD-K46018455-001-17-7 | -8.8              | -5.1    | 19.1    | 6.9     | 15.9           | 24.2    |
| 1266 | RS 67333 hydrochloride            | BRD-K46142322-003-01-6 | 2.8               | -2.1    | 28.6    | 17.4    | 18.9           | 9.4     |
| 1267 | TOLAZOLINE HYDROCHLORIDE          | BRD-K46211610-003-15-0 | -11.4             | 0.2     | 2.9     | 7.7     | 3.1            | 8.4     |
| 1268 | PROADIFEN HYDROCHLORIDE           | BRD-K46317332-003-10-3 | -17.2             | -11.7   | -31.9   | -29.8   | -8.7           | -12.1   |
| 1269 | o-3M3FBS                          | BRD-K46384212-001-01-1 | 16.0              | -0.1    | 10.9    | -6.4    | 14.7           | 7.4     |
| 1270 | Hymecromone                       | BRD-K46424862-001-04-2 | 0.2               | 5.7     | 19.9    | 16.1    | 12.3           | 14.3    |
| 1271 | LIOTHYRONINE                      | BRD-K46428823-001-01-7 | 5.0               | -1.3    | 8.9     | 6.0     | -32.1          | -22.6   |
| 1272 | VALACYCLOVIR HYDROCHLORIDE        | BRD-K46435977-003-03-8 | 1.3               | -4.1    | 16.5    | -2.7    | 11.0           | 16.7    |
| 1273 | GR 55562 dihydrochloride          | BRD-K46441700-300-01-4 | -27.6             | -13.4   | 9.1     | 7.9     | -62.1          | -30.0   |
| 1274 | SCH 442416                        | BRD-K46469693-001-01-8 | 10.6              | 5.2     | 5.6     | 34.1    | 15.5           | 22.6    |
| 1275 | SACCHARIN                         | BRD-K46493214-001-03-4 | -10.3             | -10.9   | -3.0    | 8.0     | 13.7           | 2.1     |
| 1276 | PRAMOXINE HYDROCHLORIDE           | BRD-K46523383-003-14-6 | -22.3             | -6.2    | 14.3    | 43.4    | -26.5          | -29.5   |
| 1277 | METHYLBENZETHONIUM CHLORIDE       | BRD-K46531780-003-09-8 | -55.4             | -57.8   | 21.9    | 14.7    | -65.3          | -70.0   |
| 1278 | DIPLOSALSALATE                    | BRD-K46585355-001-09-3 | 2.1               | -7.1    | 15.9    | 17.2    | 24.8           | 19.3    |
| 1279 | S 14506 hydrochloride             | BRD-K46766488-003-01-2 | -7.7              | 4.1     | -20.0   | -22.6   | -10.3          | -11.9   |
| 1280 | 6,4'-DIHYDROXYFLAVONE             | BRD-K46836114-001-04-3 | -8.3              | -3.0    | 19.2    | 33.1    | 6.8            | 4.6     |
| 1281 | Metirapone                        | BRD-K46862739-001-03-6 | 6.8               | 9.9     | 20.4    | 3.5     | 8.4            | 1.3     |
| 1282 | ANTIPYRINE                        | BRD-K46937689-001-08-5 | -4.1              | -8.9    | 19.1    | 7.1     | 1.9            | 5.8     |
| 1283 | CLOXYQUIN                         | BRD-K46982791-001-04-5 | 34.8              | 13.0    | 15.2    | 33.0    | -25.1          | -26.9   |
| 1284 | DIPHENHYDRAMINE HYDROCHLORIDE     | BRD-K47278471-003-15-6 | 18.7              | -2.3    | 2.3     | 14.5    | 11.8           | 9.9     |
| 1285 | METHAPYRILENE HYDROCHLORIDE       | BRD-K47323024-003-15-2 | -11.3             | -9.9    | 2.8     | 4.5     | 9.6            | 16.9    |

| no.  | Compound<br>Name                                         | Broad Institute ID     | Normalized scores |         |         |         |                |         |
|------|----------------------------------------------------------|------------------------|-------------------|---------|---------|---------|----------------|---------|
|      |                                                          |                        | HPr+ DNA          |         | CBA     |         | Amplex Red_HRP |         |
|      |                                                          |                        | Plate 1           | Plate 2 | Plate 1 | Plate 2 | Plate 1        | Plate 2 |
| 1286 | 4-(4-Fluorobenzoyl)-1-(4-phenylbutyl)-piperidine oxalate | BRD-K47337578-034-01-7 | -10.1             | -11.2   | -0.6    | -2.3    | 0.1            | 3.7     |
| 1287 | NIFENAZONE                                               | BRD-K47407372-001-09-8 | -9.3              | 11.4    | 18.9    | 21.4    | 8.0            | 7.1     |
| 1288 | NORHARMAN                                                | BRD-K47467075-001-13-4 | -0.1              | -1.8    | 7.5     | -1.9    | 15.1           | 15.1    |
| 1289 | PP 1                                                     | BRD-K47598052-001-06-7 | -9.6              | -6.8    | -13.4   | 5.3     | 2.4            | -0.8    |
| 1290 | DIPYROCETYL                                              | BRD-K47608922-001-02-1 | -4.9              | 13.2    | 14.3    | 14.4    | 3.1            | 17.6    |
| 1291 | BROMHEXINE HYDROCHLORIDE                                 | BRD-K47631482-003-03-9 | -7.6              | -3.0    | -42.4   | -47.5   | -40.9          | -26.0   |
| 1292 | EMD 386088 hydrochloride                                 | BRD-K47659338-003-01-0 | -6.5              | -10.9   | -16.4   | -15.0   | -17.9          | -27.5   |
| 1293 | NBQX disodium salt                                       | BRD-K47717570-304-01-5 | 50.8              | 25.9    | -9.3    | -11.6   | -11.1          | -7.7    |
| 1294 | 6,3'-DIMETHOXYFLAVONE                                    | BRD-K47724892-001-03-0 | 3.8               | -3.1    | 52.5    | 10.8    | 25.7           | 21.5    |
| 1295 | PD 168077 maleate                                        | BRD-K47761761-103-01-8 | 11.5              | -6.0    | 27.8    | 33.6    | 25.9           | 25.6    |
| 1296 | DUARTIN (-)                                              | BRD-K47814830-001-03-4 | -21.4             | 26.7    | 14.6    | 9.7     | -35.3          | -33.3   |
| 1297 | PODOFILOX                                                | BRD-K47869605-001-18-9 | 24.6              | 44.3    | 36.5    | 38.5    | 3.6            | 6.6     |
| 1298 | Piribedil dihydrochloride                                | BRD-K47936004-003-04-9 | 23.4              | 23.4    | 12.2    | 18.3    | 2.1            | 10.9    |
| 1299 | TYRPHOSTIN 51                                            | BRD-K47943470-001-03-6 | 29.5              | 63.0    | -2.8    | -0.4    | -40.1          | -40.1   |
| 1300 | OBAAs                                                    | BRD-K48029790-001-01-0 | -19.3             | -5.6    | -48.6   | -43.7   | -40.6          | -31.7   |
| 1301 | YM 298198, Desmethyl-                                    | BRD-K48059230-003-01-1 | 10.5              | -27.1   | -9.0    | -2.3    | -18.0          | -16.8   |
| 1302 | PROPYLTHIOURACIL                                         | BRD-K48168960-001-08-5 | -28.1             | -55.9   | 25.1    | 26.3    | 20.9           | 15.7    |
| 1303 | QUININE SULFATE                                          | BRD-K48278478-065-03-3 | 39.5              | 9.7     | 11.8    | 24.8    | 0.7            | 6.1     |
| 1304 | Zonisamide                                               | BRD-K48300629-001-03-8 | -8.2              | -1.1    | -3.3    | 13.1    | 21.6           | 27.2    |
| 1305 | ICI 215,001 hydrochloride                                | BRD-K48311056-003-01-7 | 7.7               | 13.2    | -5.4    | 29.6    | 19.6           | 29.4    |
| 1306 | FEBUXOSTAT                                               | BRD-K48367671-001-01-8 | -16.4             | 4.4     | 15.8    | -2.8    | 25.5           | 20.2    |
| 1307 | Y 29794 oxalate                                          | BRD-K48449073-034-01-9 | -60.7             | -65.8   | 17.3    | 8.5     | -69.4          | -72.8   |
| 1308 | NU 1025                                                  | BRD-K48692744-001-01-2 | 5.3               | -4.3    | 3.4     | 10.1    | 7.1            | -0.7    |
| 1309 | TL HSV 09                                                | BRD-K48722258-300-06-0 | 14.2              | -0.1    | 10.2    | -15.4   | -5.0           | -10.3   |
| 1310 | PD 158780                                                | BRD-K48735772-001-01-4 | 15.1              | 18.4    | -11.4   | -4.0    | -36.0          | -32.4   |
| 1311 | PSB 1115                                                 | BRD-K49027941-237-01-1 | 8.0               | -1.2    | 91.8    | 114.8   | 1.9            | 6.3     |
| 1312 | CGS 15943                                                | BRD-K49049886-001-03-8 | 18.3              | 17.2    | 0.5     | 4.5     | -6.6           | -2.7    |
| 1313 | ETHYL-beta-CARBOLINE-3-CARBOXYLATE                       | BRD-K49061529-001-01-0 | -25.2             | -47.1   | -16.4   | 1.3     | -1.0           | 0.0     |
| 1314 | SECURININE                                               | BRD-K49071277-001-03-9 | -9.9              | 0.6     | 2.5     | 6.3     | -12.0          | -9.4    |
| 1315 | PRAZOSIN HYDROCHLORIDE                                   | BRD-K49111258-003-16-4 | -75.1             | -73.5   | 10.2    | 26.4    | -65.8          | -69.7   |
| 1316 | TMPH hydrochloride                                       | BRD-K49119234-003-01-8 | -4.1              | -6.6    | -20.5   | -20.4   | -9.9           | -8.9    |
| 1317 | CYCLOVERATRYLENE                                         | BRD-K49154891-001-02-1 | 4.9               | -5.2    | 8.9     | 4.9     | -8.1           | -7.8    |
| 1318 | RETUSIN                                                  | BRD-K49158532-001-02-7 | 6.8               | -4.5    | 55.3    | 15.0    | 23.4           | 28.4    |
| 1319 | 4-METHYLDAPHNETIN                                        | BRD-K49207204-001-04-5 | 40.7              | 3.8     | 26.2    | 18.6    | -45.2          | -45.5   |
| 1320 | 6-Iodo-nordihydrocapsaicin                               | BRD-K49236613-001-01-5 | -6.1              | 13.3    | -14.1   | 1.1     | -18.6          | -20.9   |
| 1321 | BIBU 1361 dihydrochloride                                | BRD-K49294207-300-01-2 | -46.2             | -45.7   | -98.6   | -98.9   | -77.7          | -81.4   |
| 1322 | Immethridine dihydrobromide                              | BRD-K49519092-303-01-4 | -5.4              | -15.2   | 9.5     | 2.0     | 13.6           | 11.9    |
| 1323 | 7,8-DIHYDROXYFLAVONE                                     | BRD-K49535716-001-03-2 | -6.7              | 27.2    | 37.6    | 43.3    | -48.1          | -53.6   |
| 1324 | AG 18                                                    | BRD-K49657628-001-05-6 | 42.1              | 32.5    | 13.7    | 25.5    | -31.5          | -32.7   |
| 1325 | CLARITHROMYCIN                                           | BRD-K49668410-001-07-1 | 14.9              | 7.7     | 29.6    | 16.2    | 9.4            | 14.1    |
| 1326 | TTNPB                                                    | BRD-K49685476-001-05-0 | -3.0              | -8.7    | 4.5     | -2.7    | -3.7           | -21.9   |
| 1327 | 2-METHYL-3-HYDROXYETHYLENEPYRAN-4-ONE                    | BRD-K49745710-001-02-5 | -18.2             | -3.8    | 2.3     | 5.3     | 6.9            | 8.6     |
| 1328 | 4-HYDROXYANTIPYRINE                                      | BRD-K49759007-001-06-9 | -73.1             | -76.1   | -10.0   | -9.3    | -41.2          | -37.0   |
| 1329 | Gavestinel                                               | BRD-K49890030-236-01-6 | -43.4             | -36.0   | -77.0   | -84.6   | -16.3          | -12.3   |
| 1330 | GR 113808                                                | BRD-K49945136-001-03-5 | 34.0              | 5.9     | 13.1    | 4.1     | 6.6            | -7.2    |
| 1331 | RS 67506 hydrochloride                                   | BRD-K50018155-003-01-3 | 23.5              | -11.0   | 23.7    | 29.6    | 13.8           | 11.0    |

| no.  | Compound<br>Name              | Broad Institute ID      | Normalized scores |         |         |         |                |         |
|------|-------------------------------|-------------------------|-------------------|---------|---------|---------|----------------|---------|
|      |                               |                         | HPr+ DNA          |         | CBA     |         | Amplex Red_HRP |         |
|      |                               |                         | Plate 1           | Plate 2 | Plate 1 | Plate 2 | Plate 1        | Plate 2 |
| 1332 | 2-METHYL GRAMINE              | BRD-K50054100-001-03-4  | -9.1              | 1.0     | 24.5    | 22.9    | -3.6           | 0.1     |
| 1333 | TOLFENAMIC ACID               | BRD-K50133271-001-10-4  | -20.5             | -27.0   | 41.0    | 38.8    | -15.0          | -21.4   |
| 1334 | GBR 12935 dihydrochloride     | BRD-K501335270-300-01-5 | -6.6              | -7.6    | 21.3    | 20.8    | -11.0          | -10.5   |
| 1335 | MM 77 dihydrochloride         | BRD-K50293352-300-01-3  | 3.3               | -7.6    | 23.2    | 9.2     | 0.1            | 5.0     |
| 1336 | UCL 2077                      | BRD-K50325075-001-01-3  | -2.2              | -14.5   | 4.4     | 7.0     | 54.8           | 37.0    |
| 1337 | 7,4'-DIHYDROXYFLAVONE         | BRD-K50384076-001-01-9  | 18.1              | -28.7   | 20.0    | 30.1    | -3.3           | -6.5    |
| 1338 | Fenofibrate                   | BRD-K50388907-001-20-5  | -6.9              | 33.5    | 18.7    | 29.3    | 32.8           | 40.8    |
| 1339 | Chlormethiazole hydrochloride | BRD-K50422030-003-01-8  | -27.0             | 5.9     | 0.1     | 21.0    | -7.2           | 6.9     |
| 1340 | POMIFERIN                     | BRD-K50660510-001-04-0  | -63.2             | -69.6   | -8.9    | 16.3    | -85.0          | -85.5   |
| 1341 | EPICATECHIN MONOGALLATE       | BRD-K50660797-001-03-6  | 17.1              | 23.6    | -42.3   | -17.3   | -40.4          | -19.3   |
| 1342 | PENTACHLOROPHENOL             | BRD-K50711164-001-07-3  | -15.8             | -14.9   | 18.3    | 23.2    | -32.3          | -33.0   |
| 1343 | BERBAMINE HYDROCHLORIDE       | BRD-K50754849-300-03-1  | -12.9             | 0.6     | 17.8    | 42.4    | 12.2           | 9.6     |
| 1344 | Purvalanol A                  | BRD-K50836978-001-01-7  | 12.3              | 19.6    | -58.9   | -56.9   | -10.4          | -6.7    |
| 1345 | PAC 1                         | BRD-K50841342-001-01-6  | -29.4             | -34.9   | -55.3   | -48.2   | -29.1          | -27.7   |
| 1346 | SULFISOXAZOLE                 | BRD-K50859149-001-10-4  | 24.1              | -10.7   | 23.3    | 31.6    | 11.3           | 13.1    |
| 1347 | GR 103691                     | BRD-K50891186-001-03-6  | 7.0               | -16.6   | 21.0    | 32.0    | 13.1           | 3.5     |
| 1348 | TRAMADOL HYDROCHLORIDE        | BRD-K51033547-003-01-8  | 17.7              | -9.1    | 15.1    | 34.8    | 7.1            | 14.1    |
| 1349 | ETHIONAMIDE                   | BRD-K51207550-001-09-9  | -17.1             | -16.8   | 31.7    | 27.2    | 20.4           | 18.9    |
| 1350 | A-3 hydrochloride             | BRD-K51215422-003-01-1  | -21.3             | -17.2   | 17.8    | 17.5    | -34.5          | -22.6   |
| 1351 | AG 99                         | BRD-K51223576-001-01-3  | 103.9             | 134.4   | 16.9    | 11.6    | -44.8          | -47.1   |
| 1352 | FENBENDAZOLE                  | BRD-K51318897-001-07-0  | 25.3              | 3.9     | 14.0    | 40.0    | 9.9            | 9.2     |
| 1353 | TOREMIPHENE CITRATE           | BRD-K51350053-048-06-6  | -54.5             | -54.8   | 15.9    | 3.5     | -77.6          | -80.1   |
| 1354 | DIFRACTAIC ACID               | BRD-K51370144-001-06-4  | -48.8             | -40.1   | 31.9    | 19.9    | -38.5          | -42.4   |
| 1355 | ST638                         | BRD-K51476772-001-01-9  | 12.5              | 11.2    | -10.6   | -17.5   | -15.0          | -22.7   |
| 1356 | Ro 25-6981 maleate            | BRD-K51541829-001-01-3  | 22.1              | -1.0    | -18.9   | 6.8     | -1.6           | 5.9     |
| 1357 | (S)-(-)-Sulpiride             | BRD-K51671335-001-04-9  | -9.2              | 2.2     | 19.7    | 12.6    | 10.8           | 12.9    |
| 1358 | ESCULIN MONOHYDRATE           | BRD-K51742987-002-02-1  | 8.3               | 10.6    | 91.0    | 98.9    | 16.4           | 17.6    |
| 1359 | Iodophenpropit dihydrobromide | BRD-K51918615-303-01-1  | -11.1             | -16.3   | -42.0   | -28.0   | 4.9            | -2.0    |
| 1360 | deoxyrhapontin                | BRD-K52015643-001-01-1  | 20.2              | 34.2    | -0.6    | 10.3    | 4.8            | 1.8     |
| 1361 | METRONIDAZOLE                 | BRD-K52020312-001-15-1  | 1.7               | 7.6     | 16.8    | 16.7    | 30.7           | 14.5    |
| 1362 | BENZYL BENZOATE               | BRD-K52072429-001-06-1  | -0.1              | 6.6     | 13.5    | 24.7    | 17.5           | 20.5    |
| 1363 | OXIBENDAZOLE                  | BRD-K52075715-001-03-4  | 9.7               | -1.0    | 59.8    | 57.3    | 44.8           | 38.8    |
| 1364 | PIPERONYLIC ACID              | BRD-K52148119-001-02-3  | 2.7               | 4.5     | 16.2    | 21.8    | 9.1            | 13.4    |
| 1365 | Domoic acid                   | BRD-K52217427-001-02-3  | 12.5              | 1.7     | 10.0    | 42.2    | 18.6           | 11.9    |
| 1366 | ICI 63197                     | BRD-K52219182-001-01-6  | 67.3              | 38.0    | 32.8    | 24.6    | 23.6           | 25.6    |
| 1367 | CHLORHEXIDINE                 | BRD-K52256627-300-03-3  | -88.4             | -67.8   | 47.9    | 25.9    | -64.0          | -76.3   |
| 1368 | CHINIOFON                     | BRD-K52284881-236-01-6  | 57.7              | 50.3    | 3.7     | 27.5    | 0.8            | 2.2     |
| 1369 | CI-994                        | BRD-K52313696-001-08-1  | 7.2               | -7.4    | 11.3    | -4.2    | -3.4           | -2.0    |
| 1370 | APIIN                         | BRD-K52379519-001-02-0  | -12.6             | 3.5     | -2.1    | -5.3    | 15.3           | 8.6     |
| 1371 | GR 159897                     | BRD-K52394958-001-01-9  | 25.6              | -11.0   | 17.5    | 13.2    | 12.4           | 14.4    |
| 1372 | Alprostadi                    | BRD-K52459643-001-10-2  | -1.4              | -15.4   | 14.2    | 6.4     | 23.8           | 23.4    |
| 1373 | SC 19220                      | BRD-K52512893-001-03-0  | -10.7             | -3.2    | -11.6   | -4.3    | 10.6           | 18.5    |
| 1374 | STO-609 acetate               | BRD-K52620403-015-02-6  | 16.8              | 17.7    | 6.7     | 19.2    | 0.7            | 4.0     |
| 1375 | LIDOCAINE HYDROCHLORIDE       | BRD-K52662033-003-14-7  | 20.6              | 8.7     | 4.8     | 0.1     | 8.9            | 14.6    |
| 1376 | JAK3 Inhibitor II             | BRD-K52850071-001-01-2  | -12.4             | -4.8    | -4.4    | -14.4   | -63.0          | -65.6   |
| 1377 | ACETOHEXAMIDE                 | BRD-K52960356-001-06-4  | -20.6             | 19.8    | 41.7    | 30.2    | 18.1           | 15.7    |

| no.  | Compound<br>Name                                  | Broad Institute ID     | Normalized scores |         |         |         |                |         |
|------|---------------------------------------------------|------------------------|-------------------|---------|---------|---------|----------------|---------|
|      |                                                   |                        | HPr+ DNA          |         | CBA     |         | Amplex Red_HRP |         |
|      |                                                   |                        | Plate 1           | Plate 2 | Plate 1 | Plate 2 | Plate 1        | Plate 2 |
| 1378 | CLOMIPRAMINE HYDROCHLORIDE                        | BRD-K52989797-003-16-5 | -52.2             | -52.6   | 54.8    | 47.0    | -45.5          | -52.3   |
| 1379 | Niridazole                                        | BRD-K53123955-001-03-0 | 0.5               | -23.0   | -2.2    | 4.2     | 14.9           | 12.7    |
| 1380 | BUTYLATED HYDROXYTOLUENE                          | BRD-K53153417-001-06-2 | 1.2               | -0.4    | -1.7    | 7.5     | 0.6            | -2.6    |
| 1381 | TRIMETOZINE                                       | BRD-K53220666-001-01-8 | -7.4              | -1.0    | 14.0    | -2.2    | -2.8           | 5.3     |
| 1382 | HESPERIDIN                                        | BRD-K53229386-001-03-4 | 16.2              | 5.9     | 27.3    | 26.7    | 8.1            | 12.2    |
| 1383 | CITCO                                             | BRD-K53263234-001-02-9 | 30.5              | 8.0     | 8.7     | 36.2    | 29.7           | 22.9    |
| 1384 | (?)-U-50488 hydrochloride                         | BRD-K53532120-003-03-8 | 2.9               | 0.3     | -2.4    | 10.9    | -25.9          | -20.7   |
| 1385 | CNQX disodium salt                                | BRD-K53545112-304-01-6 | -6.2              | -2.2    | -4.8    | -4.3    | 15.9           | 13.4    |
| 1386 | IRIGENIN, 7-BENZYL ETHER                          | BRD-K53634892-001-03-2 | 5.2               | 2.9     | 39.0    | 30.5    | -11.9          | -5.7    |
| 1387 | AMITRIPTYLINE HYDROCHLORIDE                       | BRD-K53737926-003-14-6 | -2.1              | 4.1     | -35.9   | -56.3   | -24.7          | -32.8   |
| 1388 | Risperidone                                       | BRD-K53857191-001-10-2 | 22.3              | -4.6    | 0.9     | 3.6     | 1.2            | 0.3     |
| 1389 | MMPX                                              | BRD-K53878242-001-02-4 | 5.7               | 2.8     | 17.9    | 13.0    | 7.1            | 7.6     |
| 1390 | 4-HYDROXYPHENETHYLAMINE                           | BRD-K53893978-001-03-1 | 19.7              | -11.8   | 15.3    | 19.9    | 7.5            | 15.1    |
| 1391 | 2,3,4'-TRIHYDROXY-4-METHOXYBENZOPHENONE           | BRD-K53923343-001-03-4 | 46.3              | 47.7    | 32.8    | 42.0    | -30.2          | -28.2   |
| 1392 | ALX 5407 hydrochloride                            | BRD-K53979406-003-01-0 | -10.5             | -17.5   | -7.2    | -17.2   | -10.7          | -14.6   |
| 1393 | Remoxipride hydrochloride                         | BRD-K54094468-003-05-3 | 24.1              | -23.8   | 3.4     | 7.5     | 5.1            | 5.8     |
| 1394 | CPMD-1                                            | BRD-K54095730-001-01-5 | 2.4               | 9.7     | -54.3   | -36.0   | -39.2          | -28.3   |
| 1395 | Cirazoline hydrochloride                          | BRD-K54142781-003-02-7 | -7.5              | -12.0   | -4.5    | 2.8     | 14.0           | 14.0    |
| 1396 | Dorsomorphin dihydrochloride                      | BRD-K54233340-300-01-0 | -20.4             | -18.5   | -47.2   | -44.9   | -20.1          | -23.9   |
| 1397 | SB 202190                                         | BRD-K54330070-001-07-1 | -7.2              | -1.5    | -24.9   | -23.2   | -19.4          | -19.9   |
| 1398 | Doxepine HCl                                      | BRD-K54462405-003-16-5 | 14.5              | -17.3   | -6.5    | -24.3   | 1.1            | 3.2     |
| 1399 | CAPTOPRIL                                         | BRD-K54529596-001-15-6 | -4.1              | 2.4     | 16.1    | 15.6    | 12.0           | 11.2    |
| 1400 | 3-DEOXY-3beta-HYDROXYANGOLENSIC ACID METHYL ESTER | BRD-K54554531-001-02-0 | -18.8             | -11.5   | 13.0    | 6.7     | 0.8            | 0.3     |
| 1401 | R 59-022                                          | BRD-K54665485-001-04-6 | 16.3              | 9.0     | 12.8    | -5.0    | -12.8          | -4.8    |
| 1402 | BAY 36-7620                                       | BRD-K54704028-001-01-3 | -0.3              | 29.7    | 2.2     | 12.4    | 4.9            | -1.9    |
| 1403 | nTZDpa                                            | BRD-K54708045-001-01-3 | -94.9             | -94.5   | -96.7   | -95.9   | -70.6          | -73.6   |
| 1404 | TRIOXSALEN                                        | BRD-K54790157-001-10-6 | 35.8              | -0.6    | 1.6     | 21.3    | -2.6           | 0.5     |
| 1405 | PEFLOXACINE MESYLATE                              | BRD-K55034111-066-07-2 | 28.1              | -5.9    | 42.0    | 34.8    | 16.2           | 9.7     |
| 1406 | FLUPHENAZINE HYDROCHLORIDE                        | BRD-K55127134-300-07-0 | -78.3             | -82.5   | -103.5  | -104.7  | -89.0          | -88.2   |
| 1407 | 3-HYDROXYFLAVONE                                  | BRD-K55150756-001-05-7 | 27.0              | 47.0    | 3.0     | 17.8    | -18.2          | -11.7   |
| 1408 | 2-MERCAPTOBENZOTHAZOLE                            | BRD-K55160477-001-03-9 | -47.3             | -41.7   | 15.9    | 34.7    | -4.8           | -11.3   |
| 1409 | EFLOXATE                                          | BRD-K55166090-001-03-3 | -8.0              | -12.7   | 3.2     | 32.9    | -18.3          | -8.8    |
| 1410 | PENICILLIN G POTASSIUM                            | BRD-K55191674-237-12-6 | 13.9              | -1.9    | 28.9    | 19.6    | 10.5           | 12.7    |
| 1411 | 2',4'-DIHYDROXYCHALCONE 4'-GLUCOSIDE              | BRD-K55250255-001-03-6 | 6.9               | -4.4    | 27.9    | 27.0    | 25.8           | 23.3    |
| 1412 | SULFADOXINE                                       | BRD-K55250441-001-06-4 | 2.3               | 5.3     | 17.7    | 15.8    | 19.0           | 27.6    |
| 1413 | 5-FLUOROINDOLE-2-CARBOXYLIC ACID                  | BRD-K55273157-001-13-6 | -10.2             | -8.2    | 26.4    | 30.5    | 24.9           | 23.4    |
| 1414 | CPD5                                              | BRD-K55292075-001-01-0 | 26.3              | 19.8    | -66.4   | -61.8   | -59.9          | -60.8   |
| 1415 | BU 224 hydrochloride                              | BRD-K55344148-003-01-8 | 2.5               | 16.7    | 24.1    | 32.7    | 10.9           | 18.7    |
| 1416 | Anpirtoline hydrochloride                         | BRD-K55424922-003-01-0 | 17.5              | -4.9    | 7.1     | 7.2     | -0.1           | 0.0     |
| 1417 | WAY 629 hydrochloride                             | BRD-K55430733-003-01-6 | -0.5              | -19.9   | -25.9   | -5.8    | -32.7          | -27.4   |
| 1418 | TAS 301                                           | BRD-K55454768-001-01-8 | -5.0              | -4.4    | -22.4   | -15.8   | -1.5           | -2.0    |
| 1419 | Piperone hydrochloride                            | BRD-K55468218-003-01-0 | 6.1               | -38.2   | -34.0   | -17.6   | -19.1          | -19.4   |
| 1420 | FORMONONETIN                                      | BRD-K55567017-001-06-5 | -5.1              | -5.9    | 18.6    | 1.8     | 7.3            | 3.9     |
| 1421 | Co 101244 hydrochloride                           | BRD-K55677650-003-01-1 | -15.1             | 0.8     | 0.6     | -21.5   | -40.0          | -41.9   |
| 1422 | TOPOTECAN HYDROCHLORIDE                           | BRD-K55696337-003-08-7 | 77.5              | 73.3    | 31.5    | 24.6    | 8.9            | 2.9     |
| 1423 | SCH 28080                                         | BRD-K55748775-001-01-4 | 0.6               | -8.3    | -0.8    | 11.0    | 12.0           | 6.6     |



| no.  | Compound<br>Name                               | Broad Institute ID     | Normalized scores |         |         |         |                |         |
|------|------------------------------------------------|------------------------|-------------------|---------|---------|---------|----------------|---------|
|      |                                                |                        | HPr+ DNA          |         | CBA     |         | Amplex Red_HRP |         |
|      |                                                |                        | Plate 1           | Plate 2 | Plate 1 | Plate 2 | Plate 1        | Plate 2 |
| 1424 | HYMECROMONE METHYL ETHER                       | BRD-K55766625-001-04-2 | 31.1              | -8.4    | 38.4    | 33.6    | 18.1           | 19.1    |
| 1425 | VEGF Receptor 2 Kinase Inhibitor II            | BRD-K55823969-001-01-1 | 0.5               | 1.7     | -14.5   | -22.2   | 6.7            | 1.6     |
| 1426 | PHENYTOIN SODIUM                               | BRD-K55930204-236-11-0 | 4.5               | 0.9     | 14.6    | 23.6    | 31.3           | 34.2    |
| 1427 | RHC 80267                                      | BRD-K56047318-001-03-0 | -6.1              | 5.6     | 16.9    | 46.9    | 22.4           | 15.8    |
| 1428 | METHOXYVONE                                    | BRD-K56057104-001-03-7 | -14.6             | -19.0   | 16.2    | 19.1    | 18.0           | 9.7     |
| 1429 | HBDDE                                          | BRD-K56064827-001-04-7 | 158.4             | 144.3   | 118.3   | 145.4   | 23.7           | 21.5    |
| 1430 | OXICONAZOLE NITRATE                            | BRD-K56104152-008-03-3 | 16.9              | -9.5    | 40.1    | 37.0    | -17.9          | -10.6   |
| 1431 | BU 226 hydrochloride                           | BRD-K56115039-003-01-3 | -0.1              | -8.0    | 0.5     | 4.8     | 7.5            | 13.9    |
| 1432 | 3,4',5,6,7-PENTAMETHOXYFLAVONE                 | BRD-K56148010-001-01-1 | -6.4              | -5.5    | 19.8    | 4.1     | -11.4          | -15.9   |
| 1433 | benznidazole                                   | BRD-K56156805-001-05-4 | -12.6             | -6.9    | 0.3     | 8.8     | 14.1           | 11.5    |
| 1434 | trans-Triprolidine hydrochloride               | BRD-K56231354-003-01-5 | 12.5              | -3.5    | 18.1    | 11.9    | 14.7           | 18.6    |
| 1435 |                                                | BRD-K56309460-001-03-0 | -0.6              | -0.8    | 38.6    | 6.9     | 3.9            | 4.8     |
| 1436 | ZK 756326                                      | BRD-K56403959-300-01-9 | 9.2               | 22.1    | -11.0   | -18.1   | 4.6            | -7.0    |
| 1437 | Calcipotriol                                   | BRD-K56429665-001-03-9 | -1.5              | -7.7    | -70.4   | -81.1   | -27.0          | -30.0   |
| 1438 | 7-HYDROXYFLAVONE                               | BRD-K56450366-001-03-7 | 17.6              | 27.0    | 19.4    | 42.3    | 14.7           | 24.0    |
| 1439 | CHICAGO SKY BLUE                               | BRD-K56483981-342-04-9 | 33.4              | 35.0    | 13.8    | 9.2     | 11.9           | 15.9    |
| 1440 | BMS 182874 hydrochloride                       | BRD-K56509348-003-01-3 | 32.7              | 15.4    | -2.3    | 6.8     | 13.7           | 9.4     |
| 1441 | CLOFAZIMINE                                    | BRD-K56614220-001-10-9 | -9.8              | -16.2   | -18.8   | 8.4     | 8.8            | 8.0     |
| 1442 | CARBADOX                                       | BRD-K56735750-001-03-5 | 30.8              | 28.6    | 27.5    | 29.5    | 7.0            | 13.4    |
| 1443 | NARINGIN                                       | BRD-K56759808-001-03-7 | 18.6              | 12.6    | 18.7    | 23.9    | 3.5            | 4.1     |
| 1444 | Ethoxyquin                                     | BRD-K56792340-001-05-8 | -27.4             | -22.3   | 2.4     | 4.7     | -65.9          | -64.0   |
| 1445 | GUANABENZ ACETATE                              | BRD-K56800335-015-03-1 | 3.3               | 0.9     | 24.7    | 10.3    | 25.6           | 14.3    |
| 1446 | OXETHAZAINE                                    | BRD-K56940463-001-08-8 | -41.2             | -48.7   | 28.9    | 8.9     | -58.0          | -62.0   |
| 1447 | MARMESIN ACETATE                               | BRD-K57001030-001-02-5 | -9.9              | -16.9   | 4.7     | 23.7    | 5.1            | 16.9    |
| 1448 | TRIPLENNAMINE CITRATE                          | BRD-K57033106-048-03-6 | 30.2              | 4.7     | 17.9    | 9.4     | 9.1            | 5.5     |
| 1449 | CROTAMITON                                     | BRD-K57179821-001-08-9 | -0.3              | -3.8    | 9.6     | 0.3     | 5.9            | -0.5    |
| 1450 | INDOMETHACIN                                   | BRD-K57222227-001-18-6 | -12.2             | -16.6   | 1.3     | 4.6     | -2.1           | 0.2     |
| 1451 | 5-CHLOROINDOLE-2-CARBOXYLIC ACID               | BRD-K57244822-001-03-1 | -9.2              | -7.1    | 24.3    | 15.4    | 12.1           | 18.9    |
| 1452 | MOROXYDINE HYDROCHLORIDE                       | BRD-K57291914-003-05-2 | 9.6               | -17.2   | 21.3    | 21.3    | 15.6           | 27.7    |
| 1453 | PRE-084 hydrochloride                          | BRD-K57304726-003-03-6 | 34.9              | 38.6    | -15.5   | -8.6    | -2.8           | -1.5    |
| 1454 | IRIGENOL                                       | BRD-K57398215-001-03-0 | 51.4              | 53.4    | 11.5    | 19.1    | 12.6           | 10.3    |
| 1455 | TIAPRIDE HYDROCHLORIDE                         | BRD-K57432881-003-14-3 | 4.8               | 0.9     | 24.3    | 29.9    | 12.0           | 29.1    |
| 1456 | ENALAPRIL MALEATE                              | BRD-K57545991-050-16-5 | 22.4              | -14.2   | 7.3     | 20.8    | 8.4            | 2.0     |
| 1457 | PENTOXIFYLLINE                                 | BRD-K57569181-001-16-8 | -37.0             | 1.0     | -0.9    | 23.8    | 8.9            | 5.8     |
| 1458 | 1-[1-(2-BENZO[B]THIENYL)CYCLOHEXYL]PYRROLIDINE | BRD-K57586808-001-01-7 | -8.1              | -19.9   | 17.1    | 17.9    | 15.9           | 20.4    |
| 1459 | PENTYLENETETRAZOL                              | BRD-K57718010-001-08-5 | -12.4             | -11.6   | 13.3    | 9.0     | 14.6           | 11.2    |
| 1460 | Roscovitine, (S)-Isomer                        | BRD-K57810622-001-01-5 | -5.3              | -9.7    | -12.1   | -6.1    | 8.7            | 8.3     |
| 1461 | TYRPHOSTIN AG 1295                             | BRD-K57926513-001-03-7 | -0.8              | -5.5    | -5.5    | -11.8   | 9.5            | 7.9     |
| 1462 | ESCULETIN                                      | BRD-K58149231-001-10-1 | 17.5              | 4.3     | 10.4    | 7.0     | -50.5          | -45.5   |
| 1463 | METICRANE                                      | BRD-K58265391-001-06-9 | 22.3              | -13.1   | 18.6    | 34.8    | 0.5            | 9.8     |
| 1464 | Ro 90-7501                                     | BRD-K58299615-001-02-7 | -10.3             | -16.0   | -6.1    | -10.5   | -34.2          | -23.1   |
| 1465 | ACETAMINOSALOL                                 | BRD-K58464880-001-02-5 | 1.4               | 10.5    | 3.6     | -0.4    | -18.6          | -20.6   |
| 1466 | PALMATINE CHLORIDE                             | BRD-K58466253-003-07-4 | 13.2              | 18.5    | 22.1    | 10.6    | 7.3            | 1.4     |
| 1467 | ROCCELIC ACID                                  | BRD-K58612873-001-03-6 | 3.1               | 16.2    | 25.9    | 20.4    | 20.5           | 27.9    |
| 1468 | CIANIDANOL                                     | BRD-K58736316-001-08-7 | 7.6               | -1.2    | 9.7     | 14.0    | -23.5          | -29.5   |
| 1469 | SANTONIN                                       | BRD-K58787433-001-08-8 | 7.0               | 15.3    | 29.4    | 1.0     | -0.9           | 2.0     |

| no.  | Compound<br>Name                                | Broad Institute ID     | Normalized scores |         |         |         |                |         |
|------|-------------------------------------------------|------------------------|-------------------|---------|---------|---------|----------------|---------|
|      |                                                 |                        | HPr+ DNA          |         | CBA     |         | Amplex Red_HRP |         |
|      |                                                 |                        | Plate 1           | Plate 2 | Plate 1 | Plate 2 | Plate 1        | Plate 2 |
| 1470 | OXYBENZONE                                      | BRD-K59037100-001-09-7 | -36.2             | -13.9   | 10.4    | 3.2     | -6.6           | -14.3   |
| 1471 | CHLORPROTHIXENE HYDROCHLORIDE                   | BRD-K59058766-003-15-1 | -60.1             | -56.7   | -94.7   | -93.9   | -80.6          | -79.7   |
| 1472 | SB 216763                                       | BRD-K59184148-001-04-2 | 146.0             | 85.6    | 5.4     | 2.3     | 27.4           | 19.2    |
| 1473 | NAPROXEN(+)                                     | BRD-K59197931-001-03-7 | 3.2               | -3.0    | 19.6    | 16.3    | 21.9           | 16.7    |
| 1474 | CHRY SOPHANOL                                   | BRD-K59284035-001-03-8 | 34.1              | 19.2    | 13.6    | 31.8    | 12.2           | 14.8    |
| 1475 | Go 6976                                         | BRD-K59304176-001-03-3 | -15.7             | -5.3    | -36.7   | -32.2   | -14.5          | -12.8   |
| 1476 | SB 366791                                       | BRD-K59331372-001-01-2 | 37.8              | -4.1    | 0.6     | 6.1     | 10.1           | 15.3    |
| 1477 | Linopirdine dihydrochloride                     | BRD-K59332007-300-01-9 | -1.9              | -4.7    | -2.2    | -14.9   | 8.5            | -0.7    |
| 1478 | (S)-(+)-Niguldipine hydrochloride               | BRD-K59333713-003-01-2 | -11.2             | -5.3    | -29.5   | -5.3    | -29.2          | -29.4   |
| 1479 | AH 6809                                         | BRD-K59339270-001-01-8 | -7.9              | -8.1    | -3.7    | 0.2     | 27.1           | 19.5    |
| 1480 | Tozasertib VX-680 (MK-0457)                     | BRD-K59369769-001-02-1 | -21.8             | -13.9   | -16.9   | -24.8   | -14.4          | -3.3    |
| 1481 | AM 281                                          | BRD-K59419204-001-01-9 | 0.9               | -4.4    | -38.2   | -41.1   | -16.0          | -15.4   |
| 1482 | AG-879                                          | BRD-K59469039-001-03-1 | 2.7               | 21.5    | -9.1    | -11.7   | 1.5            | 0.2     |
| 1483 | PIPERINE                                        | BRD-K59522102-001-08-8 | 2.1               | -2.6    | -0.7    | 6.9     | 19.8           | 12.5    |
| 1484 | Bestatin                                        | BRD-K59574735-001-05-0 | 36.9              | 0.8     | 9.3     | 33.4    | -0.7           | -7.0    |
| 1485 | QUINIDINE GLUCONATE                             | BRD-K59632282-052-02-3 | 1.6               | -1.2    | 19.7    | 10.9    | 17.5           | 24.6    |
| 1486 | 7,2'-DIHYDROXYFLAVONE                           | BRD-K59633395-001-01-4 | 78.1              | 26.3    | 20.1    | 24.3    | 16.6           | 3.6     |
| 1487 | YM 298198 hydrochloride                         | BRD-K59650319-003-01-7 | -14.4             | -18.0   | 8.8     | 23.8    | -35.4          | -29.2   |
| 1488 | MDL 29951                                       | BRD-K59753853-001-01-5 | -4.6              | 24.1    | 7.7     | -0.4    | -3.9           | -1.8    |
| 1489 | (R)-(+)-8-Hydroxy-DPAT hydrobromide             | BRD-K59765110-004-03-8 | 13.0              | 1.8     | 19.1    | 8.9     | -11.3          | -17.4   |
| 1490 | SULFABENZAMIDE                                  | BRD-K59983611-001-15-1 | -15.6             | -28.3   | 6.7     | 4.7     | 13.1           | 8.8     |
| 1491 | 4a-Phorbol                                      | BRD-K60024823-001-01-5 | -5.9              | 8.8     | 0.6     | -14.5   | -1.0           | -26.6   |
| 1492 | GENTIAN VIOLET                                  | BRD-K60025295-003-03-3 | -96.7             | -98.2   | 33.9    | 14.3    | -85.8          | -87.9   |
| 1493 | IRBESARTAN                                      | BRD-K60038276-001-03-3 | -4.7              | 0.1     | 35.1    | 27.5    | 60.8           | 55.0    |
| 1494 | N-Methylidocaine iodide                         | BRD-K60060639-005-01-4 | 28.5              | 8.9     | -18.7   | -14.1   | 10.7           | 4.7     |
| 1495 | TYRPHOSTIN 46                                   | BRD-K60184833-001-03-1 | 88.3              | 87.3    | -6.3    | -2.5    | -43.2          | -43.5   |
| 1496 | MG-132                                          | BRD-K60230970-001-04-3 | 15.3              | 5.0     | 28.4    | 14.8    | -14.0          | -5.0    |
| 1497 | 4-NAPHTHALIMIDOBUTYRIC ACID                     | BRD-K60241851-001-06-9 | -5.7              | 1.6     | 22.7    | 25.4    | 23.1           | 22.7    |
| 1498 | Dephostatin                                     | BRD-K60274257-001-01-1 | 89.4              | 78.5    | 41.8    | 39.1    | -6.2           | -3.0    |
| 1499 | 5,7-Dichlorokynurenic acid                      | BRD-K60287130-001-04-0 | -5.0              | -5.2    | 10.0    | 24.6    | 15.8           | 17.3    |
| 1500 | ITE                                             | BRD-K60298136-001-01-7 | 7.2               | -8.9    | 2.3     | 7.1     | 3.4            | 8.1     |
| 1501 | alpha-CYANO-4-HYDROXYCINNAMIC ACID              | BRD-K60302405-001-04-5 | 4.1               | -3.8    | 32.9    | 26.5    | 22.2           | 18.0    |
| 1502 | 1-HYDROXY-3,6,7-TRIMETHOXY-2,8-DIPRENYLXANTHONE | BRD-K60465509-001-01-1 | 3.6               | -3.4    | 8.5     | 21.3    | 5.4            | 11.8    |
| 1503 | Pravastatin                                     | BRD-K60511616-236-02-2 | -6.4              | 21.4    | 29.2    | 8.0     | 6.0            | 9.5     |
| 1504 | DIMPYLATE                                       | BRD-K60567437-001-04-5 | -5.0              | -3.6    | 14.8    | 26.5    | 5.2            | 7.6     |
| 1505 | DESIPRAMINE HYDROCHLORIDE                       | BRD-K60762818-003-15-3 | -10.1             | -22.6   | 22.4    | 31.2    | -31.3          | -36.4   |
| 1506 | PERGOLIDE MESYLATE                              | BRD-K60770992-066-15-1 | 14.0              | -2.4    | 20.0    | 16.3    | 0.9            | 10.0    |
| 1507 | ADIPHENINE HYDROCHLORIDE                        | BRD-K60907894-003-14-4 | -0.9              | -7.6    | 5.1     | 6.8     | -14.7          | -16.3   |
| 1508 | R(+)-6-BROMO-APB                                | BRD-K60932973-001-01-7 | -49.1             | -49.0   | -48.9   | -51.7   | -62.6          | -62.9   |
| 1509 | SB 218795                                       | BRD-K61097567-001-03-6 | -6.4              | 2.2     | 4.9     | -0.3    | 0.0            | -10.8   |
| 1510 | NBI 27914 hydrochloride                         | BRD-K61177364-003-01-1 | 15.6              | 46.9    | 11.9    | 11.4    | 49.2           | 39.4    |
| 1511 | LOPERAMIDE HYDROCHLORIDE                        | BRD-K61250553-003-16-5 | -3.7              | 17.1    | 8.6     | 35.5    | -10.3          | -10.0   |
| 1512 | Daphnetin                                       | BRD-K61269089-001-02-2 | 20.4              | 16.8    | 18.9    | 26.3    | -30.4          | -29.6   |
| 1513 | sb 225002                                       | BRD-K61323504-001-03-2 | 27.4              | 1.5     | 2.5     | 3.8     | -29.6          | -38.5   |
| 1514 | DEGUELIN(-)                                     | BRD-K61401890-001-04-6 | 26.8              | 24.4    | -15.2   | 3.8     | -10.5          | -14.4   |
| 1515 | THIMEROSAL                                      | BRD-K61443650-236-06-5 | -77.8             | -74.4   | -92.0   | -90.6   | -71.3          | -71.1   |

| no.  | Compound<br>Name                                                               | Broad Institute ID     | Normalized scores |         |         |         |                |         |
|------|--------------------------------------------------------------------------------|------------------------|-------------------|---------|---------|---------|----------------|---------|
|      |                                                                                |                        | HPr+ DNA          |         | CBA     |         | Amplex Red_HRP |         |
|      |                                                                                |                        | Plate 1           | Plate 2 | Plate 1 | Plate 2 | Plate 1        | Plate 2 |
| 1516 | AG 43                                                                          | BRD-K61590534-001-01-4 | 18.3              | 47.2    | 16.4    | 14.1    | 26.8           | 28.2    |
| 1517 | 2,3-DCPE hydrochloride                                                         | BRD-K61734568-003-01-3 | -23.3             | -39.1   | -24.8   | -12.4   | -18.7          | -23.4   |
| 1518 | CHLORINDIONE                                                                   | BRD-K61802864-001-04-7 | -2.7              | -26.8   | 3.4     | 21.6    | -14.6          | -9.8    |
| 1519 | FG 7142                                                                        | BRD-K61951118-001-02-0 | 23.2              | -12.7   | 28.8    | 22.9    | 10.8           | 12.6    |
| 1520 |                                                                                | BRD-K62008436-001-05-6 | -3.8              | -15.7   | 18.1    | 16.2    | 11.0           | 17.7    |
| 1521 | N-Methylquipazine dimaleate                                                    | BRD-K62056274-313-01-8 | -0.5              | -30.9   | 20.5    | 26.9    | -11.5          | -3.4    |
| 1522 | WIN 55,212-3 mesylate                                                          | BRD-K62085719-066-01-4 | -8.9              | 23.4    | 2.4     | 21.2    | -1.5           | 12.6    |
| 1523 | ANAGRELIDE HYDROCHLORIDE                                                       | BRD-K62200014-003-05-5 | 10.5              | -16.2   | 19.1    | 14.0    | 4.7            | 15.2    |
| 1524 | VUF 5681 dihydrobromide                                                        | BRD-K62206109-303-01-1 | -2.6              | -23.7   | -10.0   | -1.2    | 13.5           | 14.9    |
| 1525 | T 98475                                                                        | BRD-K62221994-001-01-8 | 8.1               | -7.5    | -69.2   | -69.1   | -14.6          | -12.5   |
| 1526 | Lylamine hydrochloride                                                         | BRD-K62289640-003-01-9 | -93.1             | -87.8   | -106.9  | -107.9  | -82.0          | -83.6   |
| 1527 | KOPARIN                                                                        | BRD-K62331715-001-02-1 | 80.0              | 76.2    | 15.0    | 19.0    | -3.9           | -1.1    |
| 1528 | DY131                                                                          | BRD-K62353524-001-01-8 | 47.5              | 7.7     | 29.3    | 29.8    | 6.8            | 16.0    |
| 1529 | DAPSONE                                                                        | BRD-K62363391-001-15-7 | 11.4              | -4.5    | 10.2    | 9.1     | 7.0            | 1.1     |
| 1530 | (+)-PD 128907 hydrochloride                                                    | BRD-K62456038-003-02-2 | -6.1              | -1.2    | 4.0     | 15.2    | -26.2          | -29.2   |
| 1531 | 4-IBP                                                                          | BRD-K62537556-001-01-7 | 1.7               | -2.3    | 14.5    | 19.3    | 9.0            | 6.1     |
| 1532 | SR 2640 hydrochloride                                                          | BRD-K62562723-003-01-9 | 5.2               | -5.5    | -16.4   | -13.5   | 5.8            | 19.8    |
| 1533 | PODOPHYLLIN ACETATE                                                            | BRD-K62577500-001-03-6 | 24.9              | 0.3     | 12.9    | 24.7    | -12.6          | -10.1   |
| 1534 | 3-[2-[4-(2-Methoxyphenyl)piperazin-1-yl]ethyl]pyrimido[5,4-b] indole-2,4-dione | BRD-K62581435-001-02-0 | -8.8              | -8.2    | 8.0     | 7.6     | 13.4           | 12.2    |
| 1535 | GR 125487 sulfamate                                                            | BRD-K62594868-082-03-7 | -8.1              | 0.0     | 12.3    | 1.3     | -7.3           | 1.8     |
| 1536 | PD 98059                                                                       | BRD-K62810658-001-06-4 | 10.9              | 1.1     | 23.4    | 31.5    | 4.2            | 0.2     |
| 1537 | Aminopurine, 6-benzyl                                                          | BRD-K62929068-001-05-8 | 45.2              | 21.8    | -10.3   | 0.7     | 20.6           | -5.8    |
| 1538 | NSC 625987                                                                     | BRD-K62949423-001-02-3 | 34.5              | -7.5    | 38.7    | 34.6    | 3.6            | -0.7    |
| 1539 | ORBIFLOXACIN                                                                   | BRD-K63001556-001-03-9 | -24.2             | 9.9     | 3.9     | 14.6    | 10.8           | 4.3     |
| 1540 | JTE 907                                                                        | BRD-K63150726-001-01-3 | 7.1               | 9.9     | 18.7    | 27.2    | 29.7           | 26.0    |
| 1541 | MNITMT                                                                         | BRD-K63151507-001-01-6 | 32.8              | 42.7    | -1.1    | 16.3    | 9.1            | 9.5     |
| 1542 | METHOXSALEN                                                                    | BRD-K63430059-001-09-9 | -6.7              | -8.7    | 18.1    | 16.0    | 7.4            | 4.8     |
| 1543 | SU 5416                                                                        | BRD-K63504947-001-05-5 | 24.5              | 3.0     | -29.6   | 12.2    | -15.6          | 4.3     |
| 1544 | T 0156 hydrochloride                                                           | BRD-K63516691-003-01-2 | 3.5               | 10.8    | 24.6    | 19.8    | 18.3           | 15.8    |
| 1545 | AM 630                                                                         | BRD-K63533170-001-01-1 | 7.3               | -24.9   | -37.6   | -33.4   | -15.6          | -19.1   |
| 1546 | ERYTHROMYCIN STEARATE                                                          | BRD-K63550407-028-03-9 | 15.0              | -15.3   | 8.1     | 3.2     | -10.7          | -13.2   |
| 1547 | Bufalin                                                                        | BRD-K63606607-001-02-6 | 25.9              | 31.7    | 38.1    | 26.9    | 28.1           | 40.5    |
| 1548 | ETHACRYNIC ACID                                                                | BRD-K63630713-001-15-9 | -6.9              | -1.6    | 7.8     | 8.8     | -40.0          | -7.9    |
| 1549 | TRIFLUPROMAZINE HYDROCHLORIDE                                                  | BRD-K63675182-003-14-5 | -47.4             | -54.4   | -79.7   | -78.3   | -62.2          | -58.0   |
| 1550 | 10-HYDROXYCAMPTOTHECIN                                                         | BRD-K63784565-001-03-9 | 48.8              | 45.4    | 41.7    | 41.5    | 18.3           | 11.8    |
| 1551 | Arecaidine but-2-ynyl ester tosylate                                           | BRD-K63792901-075-01-3 | 34.7              | -30.1   | -0.4    | 19.2    | 2.8            | 1.9     |
| 1552 | RALOXIFENE HYDROCHLORIDE                                                       | BRD-K63828191-003-11-5 | -18.8             | -5.3    | -0.1    | 8.7     | -31.8          | -29.6   |
| 1553 | Thioperamide maleate                                                           | BRD-K63874012-103-01-5 | -13.5             | -12.6   | 32.2    | 22.7    | 3.3            | -1.9    |
| 1554 | DIHYDROSAMIDIN                                                                 | BRD-K63945320-001-03-2 | -4.5              | -13.5   | -25.5   | -36.9   | -13.0          | -9.5    |
| 1555 | 2-Methyl-5-hydroxytryptamine hydrochloride                                     | BRD-K64137799-003-01-7 | 31.0              | 21.0    | 15.1    | 32.7    | -13.7          | -15.8   |
| 1556 | ZD 2079 hydrochloride                                                          | BRD-K64157027-003-01-9 | -1.4              | 0.9     | -7.0    | 6.9     | 6.8            | 6.8     |
| 1557 | BTS                                                                            | BRD-K64178227-001-04-1 | -7.9              | -17.7   | 8.3     | 13.5    | 7.5            | 8.4     |
| 1558 | DIFUCOL HEXAMETHYL ETHER                                                       | BRD-K64246525-001-02-9 | 4.2               | -6.2    | 13.2    | 19.5    | 24.9           | 20.2    |
| 1559 | CFM 1571 hydrochloride                                                         | BRD-K64341947-003-01-6 | -14.5             | -15.4   | -65.2   | -64.2   | -34.8          | -36.9   |
| 1560 | DNQX                                                                           | BRD-K64400208-001-02-6 | 13.9              | 23.7    | -12.6   | -21.6   | 3.6            | -6.6    |
| 1561 | Ivachtin                                                                       | BRD-K64402243-001-01-1 | 14.9              | 24.4    | 34.8    | 38.6    | 24.3           | 17.4    |

| no.  | Compound<br>Name                          | Broad Institute ID     | Normalized scores |         |         |         |                |         |
|------|-------------------------------------------|------------------------|-------------------|---------|---------|---------|----------------|---------|
|      |                                           |                        | HPr+ DNA          |         | CBA     |         | Amplex Red_HRP |         |
|      |                                           |                        | Plate 1           | Plate 2 | Plate 1 | Plate 2 | Plate 1        | Plate 2 |
| 1562 | TOLTRAZURIL                               | BRD-K64514229-001-01-1 | -24.5             | -23.3   | -79.3   | -86.7   | -41.5          | -32.9   |
| 1563 | SALICIN                                   | BRD-K64614248-001-06-5 | -8.4              | -3.3    | 14.8    | 10.5    | 1.3            | 5.4     |
| 1564 | JNJ 16259685                              | BRD-K64670467-001-01-2 | -7.9              | 13.4    | 2.8     | -4.9    | 12.6           | 22.1    |
| 1565 | Etazolate hydrochloride                   | BRD-K64755930-003-02-4 | 15.1              | 10.3    | 9.6     | 18.8    | 22.8           | 23.7    |
| 1566 | PHLORACETOPHENONE                         | BRD-K64824948-001-03-0 | 13.6              | 14.2    | -13.1   | -6.5    | 26.6           | 34.1    |
| 1567 | NABUMETONE                                | BRD-K65146499-001-14-7 | 7.0               | -0.1    | -14.2   | -6.2    | 2.8            | -2.0    |
| 1568 | BPDQ                                      | BRD-K65185756-001-01-0 | -6.2              | -3.7    | 17.3    | 5.5     | 11.1           | 14.9    |
| 1569 | N- (9-FLUORENYLMETHOXYCARBONYL)-L-LEUCINE | BRD-K65275554-001-03-9 | 8.6               | 3.5     | -48.0   | -48.9   | -6.6           | -13.8   |
| 1570 | GP 1a                                     | BRD-K65285700-001-01-5 | -22.2             | -35.1   | -51.8   | -56.0   | -32.9          | -13.7   |
| 1571 | MONOCROTALINE                             | BRD-K65508953-001-08-9 | 31.2              | 14.7    | 58.8    | 59.4    | 24.9           | 24.7    |
| 1572 | ICARIIN                                   | BRD-K65639003-001-05-8 | 10.4              | 19.4    | 13.1    | 13.5    | 7.8            | -0.9    |
| 1573 | KINETIN                                   | BRD-K65667145-001-07-4 | 6.1               | 14.3    | 24.6    | 21.4    | 25.4           | 21.0    |
| 1574 | CGP 7930                                  | BRD-K65786282-001-02-6 | -23.5             | -11.2   | -29.0   | -18.1   | -23.3          | -23.2   |
| 1575 | Diphenyleneiodonium chloride              | BRD-K65814004-003-01-1 | -93.2             | -98.0   | -73.7   | -73.4   | -56.4          | -60.3   |
| 1576 | (S)-(+)-Rolipram                          | BRD-K65856711-001-01-0 | -12.7             | 20.2    | -9.7    | 5.2     | 5.7            | 7.3     |
| 1577 | FGIN-1-43                                 | BRD-K66093087-001-02-3 | 2.8               | 1.6     | 3.8     | 7.5     | -2.2           | 1.6     |
| 1578 | FLUVASTATIN                               | BRD-K66296774-001-02-0 | -15.2             | -11.8   | -53.2   | -57.9   | -18.7          | -27.3   |
| 1579 | ZOXAZOLAMINE                              | BRD-K66353228-001-08-8 | 21.1              | 30.2    | 13.5    | 34.4    | 16.2           | 13.9    |
| 1580 | ACETOSYRINGONE                            | BRD-K66643401-001-04-0 | 20.0              | 27.7    | -4.6    | 20.3    | -17.4          | -24.5   |
| 1581 | (+)-UH 232                                | BRD-K66715657-001-01-3 | 24.8              | -8.5    | 34.6    | -4.6    | 12.9           | 18.0    |
| 1582 | ICI-162,846                               | BRD-K66782112-001-01-2 | -13.7             | -9.2    | 5.6     | 6.1     | 13.1           | 20.1    |
| 1583 | Pifithrin- a hydrobromide                 | BRD-K66874953-004-01-3 | -9.6              | -15.2   | 12.9    | 4.9     | 10.5           | 16.2    |
| 1584 | Luzindole                                 | BRD-K67013324-001-01-5 | 7.6               | -2.7    | 7.1     | 25.7    | 33.8           | 40.6    |
| 1585 | CILOSTAZOL                                | BRD-K67017579-001-16-6 | 39.7              | -3.6    | -3.9    | 9.4     | 2.0            | 3.0     |
| 1586 | ALTRETAMINE                               | BRD-K67043667-001-15-7 | 2.7               | 2.5     | -1.6    | -4.3    | 26.1           | 7.0     |
| 1587 | Milrinone                                 | BRD-K67080878-001-05-5 | -8.6              | -12.8   | 0.9     | 14.4    | 11.6           | 12.5    |
| 1588 | 4-Phenylbutyrate, sodium salt             | BRD-K67102207-236-01-0 | 18.4              | -19.2   | -6.8    | -2.3    | 18.4           | 19.2    |
| 1589 | FENTHION                                  | BRD-K67217586-001-04-9 | -4.0              | -7.4    | -13.7   | 19.9    | 12.1           | 13.3    |
| 1590 | GIBBERELIC ACID                           | BRD-K67237946-001-04-2 | -0.7              | -6.7    | 11.7    | 12.5    | 44.8           | 32.1    |
| 1591 | SB 431542                                 | BRD-K67298865-001-03-3 | 14.9              | -5.6    | 3.2     | 16.3    | 6.6            | 12.0    |
| 1592 | TC 2559 difumarate                        | BRD-K67352070-364-01-5 | -13.6             | 17.2    | 4.1     | 1.6     | 16.8           | 9.2     |
| 1593 | SIB 1893                                  | BRD-K67439147-001-01-7 | -4.7              | 0.4     | -0.1    | 12.7    | 8.3            | 10.2    |
| 1594 | Flurofamide                               | BRD-K67445247-001-01-3 | 14.9              | 36.4    | -11.6   | -18.3   | 12.6           | 13.9    |
| 1595 | AG-126                                    | BRD-K67506692-001-04-6 | 23.0              | 25.1    | -27.0   | -9.2    | 7.7            | 17.7    |
| 1596 | PQ 401                                    | BRD-K67537649-001-01-1 | -4.1              | -7.8    | -65.0   | -56.6   | -28.7          | -31.2   |
| 1597 | MYOSMINE                                  | BRD-K67556876-001-04-9 | -12.3             | -14.9   | -20.9   | -21.2   | 16.0           | 12.1    |
| 1598 | ACEMETACIN                                | BRD-K67563174-001-09-3 | -0.3              | 15.7    | 17.0    | 0.2     | 32.2           | 30.3    |
| 1599 | CI 966 hydrochloride                      | BRD-K67680372-003-01-8 | -8.7              | 10.1    | -51.2   | -60.7   | -35.1          | -29.4   |
| 1600 | PHYSCION                                  | BRD-K6772619-001-03-6  | 20.0              | 4.0     | 13.1    | 15.2    | 13.2           | -1.5    |
| 1601 | Haloperidol hydrochloride                 | BRD-K67783091-003-03-6 | 29.0              | 14.7    | -4.2    | -9.7    | 19.5           | 11.1    |
| 1602 | ZM 323881 hydrochloride                   | BRD-K67831364-003-01-7 | 16.7              | 34.8    | 6.0     | 7.2     | 15.5           | 19.7    |
| 1603 | Palmitoylethanolamide                     | BRD-K68095457-001-04-4 | -9.6              | -21.2   | -5.2    | -4.5    | 5.2            | 5.9     |
| 1604 | CGS 20625                                 | BRD-K68103045-001-01-1 | -2.2              | 1.0     | -4.1    | -4.9    | -20.4          | -15.0   |
| 1605 | TERBINAFINE HYDROCHLORIDE                 | BRD-K68132782-003-05-4 | -5.9              | 4.5     | 24.8    | 56.6    | 38.8           | 14.2    |
| 1606 | GR 46611                                  | BRD-K68190965-001-01-4 | -9.8              | 5.9     | -23.8   | -31.8   | -15.6          | -13.3   |
| 1607 | UK 14,304 tartrate                        | BRD-K68264559-045-01-6 | 48.1              | 61.9    | 24.3    | 45.0    | 27.5           | 25.9    |

| no.  | Compound<br>Name                           | Broad Institute ID     | Normalized scores |         |         |         |                |         |
|------|--------------------------------------------|------------------------|-------------------|---------|---------|---------|----------------|---------|
|      |                                            |                        | HPr+ DNA          |         | CBA     |         | Amplex Red_HRP |         |
|      |                                            |                        | Plate 1           | Plate 2 | Plate 1 | Plate 2 | Plate 1        | Plate 2 |
| 1608 | Statil                                     | BRD-K68332390-001-03-3 | -27.7             | -5.2    | 15.3    | 3.4     | 11.3           | 24.2    |
| 1609 | W-9 hydrochloride                          | BRD-K68341547-003-01-6 | -44.9             | -35.3   | -75.0   | -61.2   | -51.3          | -60.8   |
| 1610 | ZK 93426 hydrochloride                     | BRD-K68392338-003-01-2 | -17.6             | -15.0   | -51.1   | -55.9   | -24.8          | -26.0   |
| 1611 | ML 9 hydrochloride                         | BRD-K68402494-003-01-9 | -35.2             | -34.3   | -67.3   | -63.5   | -58.9          | -52.8   |
| 1612 |                                            | BRD-K68432770-001-08-0 | -0.9              | -2.0    | -0.1    | -1.0    | 10.8           | 3.6     |
| 1613 | DICYCLOMINE HYDROCHLORIDE                  | BRD-K68507560-003-15-4 | -24.4             | -21.8   | -61.0   | -75.1   | -26.9          | -29.7   |
| 1614 | Phorbol 12-Myristate 13-Acetate            | BRD-K68552125-001-04-6 | -3.5              | -7.8    | 85.6    | 82.1    | 30.4           | 32.4    |
| 1615 | TODRALAZINE HYDROCHLORIDE                  | BRD-K68553471-003-07-3 | 10.1              | 5.1     | 8.8     | 18.0    | -28.5          | -32.8   |
| 1616 | DERACOXIB                                  | BRD-K68558722-001-03-2 | -0.3              | 27.2    | -69.7   | -77.4   | -4.8           | 17.0    |
| 1617 | ACDPP hydrochloride                        | BRD-K68633617-003-01-1 | 12.7              | 24.9    | 18.9    | 22.4    | 21.0           | 21.6    |
| 1618 | QUETIAPINE                                 | BRD-K68867920-001-05-2 | -19.5             | -29.8   | -76.2   | -80.1   | -44.2          | -50.3   |
| 1619 | VISNAGIN                                   | BRD-K68995359-001-06-9 | -11.6             | -4.5    | -3.1    | 1.3     | 20.2           | 7.2     |
| 1620 | 2,4-DICHLOROPHENOXYBUTYRIC ACID            | BRD-K69188402-001-04-2 | 47.9              | 3.0     | -41.7   | -26.6   | 18.3           | 8.7     |
| 1621 | NAN-190 hydrobromide                       | BRD-K69195780-004-03-5 | 8.4               | 6.8     | 3.5     | 21.3    | 2.8            | -6.1    |
| 1622 | RYANODINE                                  | BRD-K69556541-001-02-6 | -1.6              | -12.6   | 28.2    | 25.7    | 24.6           | 21.0    |
| 1623 | 3-HYDROXYMETHYL-beta-CARBOLINE             | BRD-K69585439-001-01-2 | -23.5             | -36.7   | 52.8    | 39.1    | 4.6            | 1.0     |
| 1624 | TACROLIMUS                                 | BRD-K69608737-001-03-7 | -9.1              | -8.8    | -58.5   | -34.4   | -13.5          | -20.5   |
| 1625 |                                            | BRD-K69650333-001-02-9 | 7.6               | 0.9     | -29.1   | -26.4   | -4.7           | -11.0   |
| 1626 | LY 341495                                  | BRD-K69763916-001-01-7 | 24.6              | 16.3    | -4.1    | 20.2    | 13.9           | 21.1    |
| 1627 | Trap 101                                   | BRD-K69837166-003-01-2 | 6.4               | -3.1    | -22.6   | -3.0    | -8.6           | 16.1    |
| 1628 | L-692,585                                  | BRD-K70241288-001-01-1 | -9.0              | 2.1     | 22.5    | 16.5    | 33.9           | 45.9    |
| 1629 | RIBOFLAVIN                                 | BRD-K70246307-001-03-3 | 294.8             | 308.9   | -6.6    | 0.3     | 11.3           | 3.7     |
| 1630 | U 99194 maleate                            | BRD-K70281171-103-01-1 | 10.1              | -4.2    | 17.1    | 17.0    | 10.6           | 20.0    |
| 1631 | ESCITALOPRAM OXALATE                       | BRD-K70301876-034-06-1 | 38.9              | 58.4    | -3.2    | 19.8    | 12.3           | 9.5     |
| 1632 | SURAMIN                                    | BRD-K70327167-348-09-2 | 12.2              | -8.4    | 7.1     | 4.0     | 1.5            | 8.5     |
| 1633 | BENZOXIQUINE                               | BRD-K70327191-001-01-4 | 8.7               | 2.2     | 16.6    | 18.5    | -3.5           | -4.5    |
| 1634 | AMANTADINE HYDROCHLORIDE                   | BRD-K70330367-003-03-8 | 17.4              | 33.9    | 12.3    | 5.4     | 3.5            | 6.4     |
| 1635 | 1-(2-METHOXYPHENYL)PIERAZINE HYDROCHLORIDE | BRD-K70343553-003-06-8 | 2.2               | 13.6    | 11.8    | 3.0     | 5.8            | -6.1    |
| 1636 | ARIPIRAZOLE                                | BRD-K70358946-001-06-6 | -9.9              | -38.9   | -70.1   | -53.4   | -52.0          | -44.5   |
| 1637 | RANITIDINE                                 | BRD-K70505054-001-02-9 | -2.0              | -5.3    | -5.7    | -2.2    | 5.0            | -3.3    |
| 1638 | H-9 dihydrochloride                        | BRD-K70577657-300-04-1 | 5.3               | -3.2    | -7.6    | 5.5     | -0.6           | 6.0     |
| 1639 | 1-EBIO                                     | BRD-K70586315-001-01-6 | 0.5               | 17.5    | 28.2    | 29.6    | 26.2           | 27.4    |
| 1640 | TRAZODONE HYDROCHLORIDE                    | BRD-K70778732-003-15-0 | -8.4              | -0.2    | 6.6     | 3.4     | 3.4            | 2.4     |
| 1641 | 10-DEBC hydrochloride                      | BRD-K70792160-003-01-2 | -100.3            | -93.3   | -100.0  | -100.8  | -82.7          | -82.5   |
| 1642 | HOMOPTEROCARPIN                            | BRD-K71093375-001-03-5 | 17.2              | 12.6    | -9.8    | -14.5   | 4.5            | 6.7     |
| 1643 | SULFADIMETHOXINE                           | BRD-K71125014-001-17-2 | -2.8              | -11.3   | 6.3     | 7.7     | 12.3           | 13.7    |
| 1644 | SULFAQUINOXALINE SODIUM                    | BRD-K71133585-236-08-6 | 5.4               | 7.6     | -6.2    | 2.2     | 10.9           | -1.0    |
| 1645 | ISOPEONOL                                  | BRD-K71175374-001-02-3 | 9.2               | 2.2     | 4.8     | 15.8    | 11.2           | 1.4     |
| 1646 | Clobenpropit dihydrobromide                | BRD-K71430621-303-01-5 | 3.1               | 7.5     | 4.1     | -2.6    | 11.8           | 2.7     |
| 1647 | MORANTEL CITRATE                           | BRD-K71454870-048-03-0 | -8.5              | -22.4   | -4.9    | -4.3    | 12.4           | 6.1     |
| 1648 | GW 9508                                    | BRD-K71534238-001-03-5 | -2.1              | -5.7    | -47.7   | -46.5   | -5.4           | 0.3     |
| 1649 | PNU 120596                                 | BRD-K71731651-001-01-9 | 2.1               | -6.8    | 14.8    | 19.9    | -1.0           | 4.8     |
| 1650 | CARBAMAZEPINE                              | BRD-K71799949-001-18-2 | 22.1              | -2.3    | -8.8    | 4.1     | 4.9            | 5.3     |
| 1651 | Cdk2/5 Inhibitor                           | BRD-K71860425-001-01-1 | 33.9              | 1.7     | 43.1    | 31.1    | 23.3           | 15.6    |
| 1652 |                                            | BRD-K71879491-001-15-0 | -10.4             | 12.0    | 1.4     | 5.3     | -0.1           | -4.6    |
| 1653 | MRS 1754                                   | BRD-K72024482-001-01-3 | -2.6              | -3.3    | 22.5    | 19.9    | 16.1           | 17.2    |

| no.  | Compound<br>Name                                                               | Broad Institute ID     | Normalized scores |         |         |         |                |         |
|------|--------------------------------------------------------------------------------|------------------------|-------------------|---------|---------|---------|----------------|---------|
|      |                                                                                |                        | HPr+ DNA          |         | CBA     |         | Amplex Red_HRP |         |
|      |                                                                                |                        | Plate 1           | Plate 2 | Plate 1 | Plate 2 | Plate 1        | Plate 2 |
| 1654 | PROBUCOL                                                                       | BRD-K72029282-001-15-4 | 14.3              | 3.9     | -6.5    | -7.4    | 4.0            | 5.3     |
| 1655 | DERRUSNIN                                                                      | BRD-K72066653-001-03-3 | 2.8               | -9.6    | -19.5   | -16.9   | 2.7            | -8.1    |
| 1656 | BPIQ-1                                                                         | BRD-K72211743-001-01-1 | -3.4              | -5.2    | 15.7    | 9.0     | 7.0            | 4.6     |
| 1657 | QUINAPRIL HYDROCHLORIDE                                                        | BRD-K7222507-003-07-7  | -6.4              | -13.8   | 8.5     | 9.6     | 27.5           | 21.9    |
| 1658 | ISOPIMPINELLIN                                                                 | BRD-K72253829-001-07-7 | 6.6               | 1.3     | -4.1    | 23.1    | 33.5           | 24.8    |
| 1659 | DYCLONINE HYDROCHLORIDE                                                        | BRD-K72259270-003-15-7 | -62.3             | -62.5   | -93.1   | -92.7   | -86.4          | -85.1   |
| 1660 | BAICALEIN                                                                      | BRD-K72327355-001-06-3 | 86.7              | 59.0    | 49.8    | 65.8    | -12.6          | -16.5   |
| 1661 | C-1                                                                            | BRD-K72462751-001-01-9 | -7.8              | -11.4   | -9.0    | -17.6   | -8.4           | 8.9     |
| 1662 | Fluvoxamine maleate                                                            | BRD-K72676686-103-01-8 | -9.2              | -15.2   | -53.5   | -57.6   | -18.2          | -24.4   |
| 1663 | ZM 447439                                                                      | BRD-K72703948-001-02-8 | 7.4               | -7.9    | -25.4   | -19.0   | -16.3          | -9.7    |
| 1664 | BENZETHONIUM CHLORIDE                                                          | BRD-K72723676-003-10-3 | -77.2             | -76.5   | -98.0   | -97.5   | -87.9          | -86.7   |
| 1665 | Arcyriaflavin A                                                                | BRD-K72726508-001-01-3 | 41.0              | 31.4    | -13.5   | -9.6    | -19.3          | -19.0   |
| 1666 | AG 555                                                                         | BRD-K72783841-001-01-0 | 3.3               | 5.7     | -44.5   | -54.1   | -53.5          | -60.0   |
| 1667 | SSR 69071                                                                      | BRD-K72895815-001-01-4 | -32.2             | -24.7   | -87.2   | -87.5   | -50.8          | -54.2   |
| 1668 | ZIDOVUDINE [AZT]                                                               | BRD-K72903603-001-14-5 | 16.7              | 18.0    | -2.8    | -2.6    | 0.1            | -2.2    |
| 1669 | CINCHOPHEN                                                                     | BRD-K72915123-001-11-6 | -4.0              | -4.0    | -11.1   | 13.1    | 20.0           | 14.5    |
| 1670 | PEUCENIN                                                                       | BRD-K73103240-001-03-3 | 18.7              | 2.6     | -36.4   | -26.9   | -17.3          | -24.4   |
| 1671 | DIAZOXIDE                                                                      | BRD-K73109821-001-10-2 | -18.1             | -4.6    | 18.9    | 44.0    | 26.0           | 17.3    |
| 1672 | PHENYL AMINOSALICYLATE                                                         | BRD-K73157543-001-03-3 | 8.3               | 12.6    | 7.2     | 16.8    | -0.3           | 12.3    |
| 1673 | ALIZARIN                                                                       | BRD-K73191876-001-04-7 | 8.7               | 7.0     | 13.2    | 22.1    | -12.6          | -21.0   |
| 1674 | URAPIDIL HYDROCHLORIDE                                                         | BRD-K73196317-003-07-2 | -8.5              | -13.5   | -13.2   | -0.5    | 4.2            | 1.7     |
| 1675 | TRIPTOPHENOLIDE                                                                | BRD-K73210450-001-03-1 | -13.3             | -9.5    | -43.1   | -39.7   | -54.0          | -54.0   |
| 1676 | CLORGILINE HYDROCHLORIDE                                                       | BRD-K73251053-003-13-1 | 3.5               | -7.9    | -17.8   | -13.6   | -8.4           | -11.1   |
| 1677 | ICI-199,441 hydrochloride                                                      | BRD-K73290745-003-01-8 | -27.1             | -27.8   | -65.4   | -72.7   | -59.2          | -49.4   |
| 1678 | BIOCHANIN A                                                                    | BRD-K73303757-001-12-5 | -1.8              | -0.8    | -28.3   | -19.5   | 8.4            | -0.5    |
| 1679 | OXOLINIC ACID                                                                  | BRD-K73394555-001-08-6 | -4.1              | 3.8     | -2.2    | -1.8    | 14.2           | 10.4    |
| 1680 | ARP 101                                                                        | BRD-K73395020-001-01-5 | -6.6              | -23.8   | -44.0   | -54.0   | -24.7          | -18.7   |
| 1681 | Pumorphamine                                                                   | BRD-K73397362-001-01-7 | 4.3               | -8.4    | 1.3     | 18.0    | 26.8           | 23.2    |
| 1682 | DIBUTYL PHTHALATE                                                              | BRD-K73477617-001-04-4 | 5.8               | 8.0     | 20.0    | 35.9    | 19.4           | 22.9    |
| 1683 | NIZATIDINE                                                                     | BRD-K73589491-001-05-4 | -10.0             | -4.2    | 4.5     | 2.4     | 4.1            | 2.3     |
| 1684 | BROMOPRIDE                                                                     | BRD-K73642618-001-08-3 | 9.4               | -3.1    | -1.2    | -4.6    | 7.2            | 11.8    |
| 1685 | N-Acetyltryptamine                                                             | BRD-K73700643-001-04-7 | 8.6               | 13.9    | 37.8    | 39.3    | 9.8            | 15.2    |
| 1686 | ZM 336372                                                                      | BRD-K73789395-001-05-7 | -32.4             | -19.3   | 27.7    | 44.3    | 48.2           | 40.8    |
| 1687 | SKATOLE                                                                        | BRD-K73824630-001-03-2 | 6.7               | 7.0     | 27.2    | 11.6    | 34.8           | 38.0    |
| 1688 | N-hydroxy-2-phenylacetamide                                                    | BRD-K74112339-001-03-5 | 7.2               | 10.8    | 5.8     | -9.2    | 8.1            | 9.3     |
| 1689 | (-)-Cytisine                                                                   | BRD-K74186897-001-04-1 | 5.4               | -1.4    | -0.3    | -3.1    | 23.5           | 22.3    |
| 1690 | RESORCINOL                                                                     | BRD-K74190368-001-02-7 | 4.8               | 5.7     | 7.5     | 15.4    | -16.9          | -20.7   |
| 1691 | Irsogladine maleate                                                            | BRD-K74195153-050-03-0 | 6.6               | -8.9    | 18.5    | 16.7    | 13.0           | 2.7     |
| 1692 | DCB                                                                            | BRD-K74430258-001-01-2 | -17.5             | 20.7    | -4.1    | -1.2    | 6.9            | -1.5    |
| 1693 | AZITHROMYCIN                                                                   | BRD-K74501079-001-07-4 | 28.2              | 37.2    | 16.5    | 22.2    | 32.7           | 33.0    |
| 1694 | 2-METHYL-4-(PIPERIDIN-1-YLCARBOXY)-5-ISOPROPYLPHENYLTRIMETHYLAMMONIUM CHLORIDE | BRD-K74534237-003-01-3 | -11.7             | 4.3     | 11.9    | 43.5    | 16.3           | 24.1    |
| 1695 | CATECHIN TETRAMETHYLETHER                                                      | BRD-K74727418-001-03-4 | -13.9             | -15.0   | -16.4   | 3.1     | 7.2            | -7.1    |
| 1696 | BW 373U86                                                                      | BRD-K74990253-001-01-0 | -2.7              | -12.1   | 32.1    | 16.6    | 10.4           | 11.3    |
| 1697 | PROCAINAMIDE HYDROCHLORIDE                                                     | BRD-K75089421-003-15-3 | 9.9               | 2.7     | 9.7     | 8.5     | 12.0           | 10.5    |
| 1698 | Cdk1 Inhibitor III                                                             | BRD-K75127215-001-01-5 | -0.7              | 18.6    | 20.1    | 32.7    | 4.1            | 17.1    |
| 1699 | PROTIONAMIDE                                                                   | BRD-K75360161-001-09-9 | 2.6               | 4.6     | 5.5     | 17.7    | 10.2           | 14.3    |

| no.  | Compound<br>Name              | Broad Institute ID     | Normalized scores |         |         |         |                |         |
|------|-------------------------------|------------------------|-------------------|---------|---------|---------|----------------|---------|
|      |                               |                        | HPr+ DNA          |         | CBA     |         | Amplex Red_HRP |         |
|      |                               |                        | Plate 1           | Plate 2 | Plate 1 | Plate 2 | Plate 1        | Plate 2 |
| 1700 | BENZOCAINE                    | BRD-K75466013-001-08-6 | 1.6               | 5.0     | 48.2    | 57.2    | 26.3           | 23.4    |
| 1701 | GS39783                       | BRD-K75478907-001-01-5 | 11.6              | 19.1    | 1.5     | 13.9    | -2.8           | 31.9    |
| 1702 | (R)-(-)-Rolipram              | BRD-K75516118-001-01-7 | -3.9              | 25.7    | -16.3   | 17.0    | 39.2           | 41.8    |
| 1703 | HYDROXYTOLUIC ACID            | BRD-K75608666-001-03-4 | -4.7              | 4.8     | 0.6     | 2.6     | 10.3           | 10.6    |
| 1704 | B-HT 920                      | BRD-K75615183-300-02-1 | 30.8              | 32.4    | 12.7    | 26.9    | 16.3           | 24.0    |
| 1705 | METOCLOPRAMIDE HYDROCHLORIDE  | BRD-K75641298-003-16-9 | 8.5               | -1.4    | 9.2     | 16.3    | 5.8            | -3.9    |
| 1706 | RIZATRIPTAN BENZOATE          | BRD-K75699339-057-03-2 | -1.5              | 13.7    | 10.3    | 5.8     | 0.6            | 5.7     |
| 1707 | 3,7-DIMETHOXYFLAVONE          | BRD-K75745696-001-03-8 | -10.8             | -14.1   | -31.2   | -31.6   | -4.8           | -3.9    |
| 1708 | m-CPP hydrochloride           | BRD-K75844781-003-03-1 | -2.3              | -0.7    | -8.1    | -1.2    | 5.6            | 0.0     |
| 1709 | IDOQUINOL                     | BRD-K75855670-001-06-8 | 36.3              | 45.7    | -25.1   | -10.9   | -12.6          | -10.0   |
| 1710 | PIZOTYLIN MALATE              | BRD-K75958195-037-04-5 | -3.9              | -4.8    | -41.8   | -37.0   | -7.1           | -1.7    |
| 1711 | LOSARTAN                      | BRD-K76205745-001-04-1 | 12.4              | 4.8     | 23.0    | 20.3    | 16.0           | 19.6    |
| 1712 | PHENAZOPYRIDINE HYDROCHLORIDE | BRD-K76304753-003-08-8 | 3.6               | 4.1     | -10.3   | 2.2     | 0.7            | -8.5    |
| 1713 | NITROMIDE                     | BRD-K76381435-001-04-5 | 1.7               | -0.3    | 8.2     | 29.1    | 17.3           | 18.8    |
| 1714 | ENROFLOXACIN                  | BRD-K76534306-001-11-0 | -10.0             | -6.5    | 21.8    | 33.1    | 25.4           | 30.4    |
| 1715 | PHTPP                         | BRD-K76568384-001-01-4 | 18.0              | 31.0    | 36.3    | 20.6    | 32.8           | 29.4    |
| 1716 | HA-1077                       | BRD-K76617868-300-04-4 | -10.6             | -0.4    | -14.2   | -20.3   | -10.0          | 8.4     |
| 1717 | Homoharringtonine             | BRD-K76674262-001-01-7 | -6.5              | -3.4    | 14.9    | 9.3     | 6.3            | 7.0     |
| 1718 | (+)-AJ 76 hydrochloride       | BRD-K76677554-003-01-3 | 1.1               | 11.9    | -4.5    | 12.7    | 16.7           | 9.3     |
| 1719 | NIMESULIDE                    | BRD-K76775527-001-18-7 | -6.8              | -13.1   | -28.8   | -24.7   | -11.3          | -17.0   |
| 1720 | SB 415286                     | BRD-K76805682-001-05-0 | 62.5              | 50.8    | -29.6   | -21.1   | -37.5          | -40.5   |
| 1721 | DIPYRONE                      | BRD-K76812510-236-08-0 | -17.2             | -40.3   | 31.8    | 42.5    | -24.8          | -28.5   |
| 1722 | RS 17053 hydrochloride        | BRD-K76840893-003-01-7 | -62.4             | -64.5   | -74.3   | -76.9   | -67.7          | -70.5   |
| 1723 | SULFANITRAN                   | BRD-K76845197-001-02-1 | 6.0               | 5.9     | -13.6   | -22.5   | 0.2            | -4.8    |
| 1724 | Proxyfan maleate              | BRD-K77171813-050-01-4 | 18.6              | 8.3     | 7.1     | 7.6     | 7.2            | 2.8     |
| 1725 | 4-HYDROXY-6-METHYLPYRAN-2-ONE | BRD-K77202630-001-03-7 | 4.4               | -1.2    | 8.4     | 17.9    | 27.8           | 15.3    |
| 1726 | RAUWOLSCINE HYDROCHLORIDE     | BRD-K77474816-003-09-1 | 13.8              | 12.9    | 6.5     | 21.2    | 22.2           | 16.7    |
| 1727 | A 205804                      | BRD-K77627880-001-01-6 | 4.5               | 21.9    | -11.8   | -11.6   | 18.8           | 26.5    |
| 1728 | AEG 3482                      | BRD-K77634909-001-02-7 | -3.8              | -13.9   | -12.9   | -24.4   | 6.4            | 13.2    |
| 1729 | NAPHAZOLINE HYDROCHLORIDE     | BRD-K77641333-003-15-6 | -1.3              | 14.5    | -3.8    | 12.1    | 17.1           | 14.6    |
| 1730 | SB 200646 hydrochloride       | BRD-K77677632-003-01-8 | -24.7             | -27.8   | -16.0   | -5.3    | -1.3           | -13.3   |
| 1731 | ACACETIN                      | BRD-K77685744-001-07-7 | 9.0               | -12.7   | -8.7    | 7.7     | 11.7           | 14.0    |
| 1732 | THIABENDAZOLE                 | BRD-K77695569-001-16-9 | 3.0               | 8.0     | 19.8    | -6.6    | 17.4           | 18.6    |
| 1733 | Moxonidine hydrochloride      | BRD-K77771411-003-03-2 | 12.2              | 5.5     | -7.9    | 4.9     | 6.3            | 10.5    |
| 1734 | HA 1100 hydrochloride         | BRD-K77793136-003-02-2 | -1.9              | 5.1     | 31.5    | 15.3    | 11.9           | 7.0     |
| 1735 | MS-275                        | BRD-K77908580-001-04-7 | 2.5               | 3.6     | 20.0    | 10.6    | -0.8           | 8.2     |
| 1736 | PD 81723                      | BRD-K77951111-001-01-1 | 2.1               | 2.7     | 0.1     | 21.7    | 15.9           | 8.6     |
| 1737 | MEBENDAZOLE                   | BRD-K77987382-001-08-2 | 10.2              | 17.4    | 37.3    | 38.3    | -6.1           | 8.6     |
| 1738 | FUROSEMIDE                    | BRD-K78010432-001-10-8 | -2.4              | 10.4    | -27.3   | 3.8     | 19.6           | 16.3    |
| 1739 | 4-PPBP maleate                | BRD-K78061844-103-01-6 | 22.3              | 7.5     | 29.2    | 29.5    | 16.3           | 15.4    |
| 1740 | ENOXACIN                      | BRD-K78113049-001-07-1 | 3.6               | 3.9     | 10.1    | 7.3     | 10.0           | 12.9    |
| 1741 | NNC 55-0396 dihydrochloride   | BRD-K78122587-300-01-9 | -106.4            | -104.0  | -94.2   | -93.6   | -79.0          | -81.4   |
| 1742 | MENADIONE                     | BRD-K78126613-001-16-0 | -16.1             | -15.8   | -56.0   | -54.1   | -61.6          | -62.2   |
| 1743 | ANHYDROBRAZILIC ACID          | BRD-K78414110-001-03-6 | 21.6              | 20.0    | 15.2    | 19.8    | 26.7           | 30.8    |
| 1744 | OLMESARTAN MEDOXOMIL          | BRD-K78485176-001-03-7 | 10.4              | 17.2    | 7.9     | 26.3    | 30.8           | 25.5    |
| 1745 | SCS                           | BRD-K78496197-001-02-1 | 9.5               | 7.4     | -9.6    | -4.8    | -9.3           | -10.3   |

| no.  | Compound<br>Name                                 | Broad Institute ID     | Normalized scores |         |         |         |                |         |
|------|--------------------------------------------------|------------------------|-------------------|---------|---------|---------|----------------|---------|
|      |                                                  |                        | HPr+ DNA          |         | CBA     |         | Amplex Red_HRP |         |
|      |                                                  |                        | Plate 1           | Plate 2 | Plate 1 | Plate 2 | Plate 1        | Plate 2 |
| 1746 | LONIDAMINE                                       | BRD-K78513633-001-06-6 | 2.8               | 4.4     | 58.1    | 25.7    | 26.3           | 9.9     |
| 1747 | ELETRIPTAN HYDROBROMIDE                          | BRD-K78537690-004-01-0 | 9.1               | 5.2     | 22.4    | -11.2   | 5.8            | 8.4     |
| 1748 | CITROPTEN                                        | BRD-K78612426-001-05-9 | -7.7              | -1.9    | 81.8    | 89.9    | -7.5           | -20.5   |
| 1749 | Exo1                                             | BRD-K78633253-001-04-6 | 10.6              | -0.5    | 14.5    | 36.2    | 9.2            | 22.5    |
| 1750 | LY 320135                                        | BRD-K78637815-001-01-4 | -9.3              | -3.1    | -2.9    | -2.0    | 13.3           | 2.4     |
| 1751 | BROMPERIDOL                                      | BRD-K78643075-001-06-6 | -28.3             | -23.2   | -60.2   | -67.6   | -53.1          | -63.4   |
| 1752 | Leflunomide                                      | BRD-K78692225-001-11-2 | -8.9              | -11.1   | 3.5     | 11.5    | 10.0           | 4.7     |
| 1753 | SUXIBUZONE                                       | BRD-K78815826-001-08-8 | 1.6               | 8.1     | 0.4     | 24.1    | 5.2            | -5.2    |
| 1754 | ASPARTAME                                        | BRD-K78841970-001-06-2 | 6.9               | 12.0    | -10.8   | 13.2    | 10.0           | 8.9     |
| 1755 | N-[2-(Piperidinylamino)ethyl]-4-iodobenzamide    | BRD-K78844995-001-01-8 | -8.8              | 23.1    | -4.4    | -9.9    | -4.8           | 0.8     |
| 1756 | FPL 64176                                        | BRD-K78959463-001-05-8 | -0.6              | 6.7     | -4.1    | 10.7    | -2.2           | -3.2    |
| 1757 | NITROFUZAZONE                                    | BRD-K79092138-001-06-0 | 11.7              | 22.5    | 8.8     | 44.7    | 17.0           | 17.9    |
| 1758 | ALBENDAZOLE                                      | BRD-K79131256-001-08-8 | 23.5              | 22.6    | -11.7   | 33.0    | 6.6            | 31.3    |
| 1759 | CY 208-243                                       | BRD-K79353516-001-03-5 | 22.4              | 11.9    | -19.9   | -15.9   | -7.9           | -10.9   |
| 1760 | COTARNINE CHLORIDE                               | BRD-K79535367-003-02-5 | 7.1               | 2.5     | -18.8   | -11.0   | 9.8            | -13.2   |
| 1761 | Metformin (1,1-Dimethylbiguanide, Hydrochloride) | BRD-K79602928-003-04-1 | -13.8             | -15.3   | 28.9    | 11.5    | 0.1            | 9.9     |
| 1762 | Ro 10-5824                                       | BRD-K79684402-300-01-0 | 0.7               | 9.9     | -0.7    | -12.6   | 9.4            | 1.0     |
| 1763 | THIAMPHENICOL                                    | BRD-K79711234-001-11-8 | 7.0               | 1.1     | 3.9     | 7.6     | -0.1           | -0.9    |
| 1764 | SILDENAFIL CITRATE                               | BRD-K79759585-048-01-4 | -0.9              | -0.7    | 5.8     | 18.7    | 23.6           | 31.7    |
| 1765 | Gabazine                                         | BRD-K79905821-001-01-6 | -10.8             | -8.0    | 16.8    | 15.7    | 11.5           | 15.4    |
| 1766 | GW 583340 dihydrochloride                        | BRD-K79930101-300-01-1 | -18.9             | -19.8   | -13.9   | -16.9   | -21.3          | -4.8    |
| 1767 | CLOPIDOL                                         | BRD-K80036624-001-03-2 | 5.2               | -0.9    | 6.2     | 30.0    | 10.9           | 16.2    |
| 1768 | DPPE fumarate                                    | BRD-K80315159-051-01-2 | -17.7             | -17.2   | -15.1   | -15.7   | -13.6          | -6.0    |
| 1769 | (+/-)-abscisic acid                              | BRD-K80342836-001-01-2 | -2.0              | -22.0   | -9.2    | 3.7     | 25.3           | 22.5    |
| 1770 | SILIBININ                                        | BRD-K80353138-001-07-1 | 32.5              | 43.5    | -31.2   | -14.9   | -22.3          | -32.6   |
| 1771 | KHELLIN                                          | BRD-K80353807-001-16-2 | -22.3             | -9.8    | -0.3    | 25.4    | 21.5           | 29.8    |
| 1772 | Zamifenacin fumarate                             | BRD-K80451230-051-01-8 | -3.8              | -16.6   | -8.1    | -20.6   | 1.5            | 0.5     |
| 1773 | 6,7-DICHLOROQUINOXALINE-2,3-DIONE                | BRD-K80576679-001-03-1 | 7.7               | 2.7     | 17.5    | 35.1    | 0.7            | 5.3     |
| 1774 | SB 258585 hydrochloride                          | BRD-K80639402-003-01-1 | -0.2              | -1.8    | -31.0   | -35.9   | -30.3          | -29.4   |
| 1775 | RS 16566 hydrochloride                           | BRD-K80725821-300-01-1 | 7.9               | 32.7    | -7.1    | -14.3   | 14.7           | 16.3    |
| 1776 | Resveratrol                                      | BRD-K80738081-001-07-0 | -26.6             | -39.0   | 12.9    | 12.5    | -18.4          | -15.6   |
| 1777 | Ro 19-4605                                       | BRD-K80778372-001-01-7 | 16.1              | -9.5    | 14.0    | 13.9    | 19.1           | 20.1    |
| 1778 | N-PHENYLANTHRANILIC ACID                         | BRD-K80863915-001-05-2 | 19.4              | 19.4    | -7.8    | 11.7    | 8.2            | -0.8    |
| 1779 | TRIACETYLRISVERATROL                             | BRD-K80946661-001-03-6 | 6.3               | 4.9     | -15.9   | -40.1   | 2.7            | 2.7     |
| 1780 | METHYLXANTHOXYLIN                                | BRD-K81120886-001-01-0 | 7.2               | 2.0     | 0.3     | 15.7    | 2.7            | 0.0     |
| 1781 | SALICYLAMIDE                                     | BRD-K81130846-001-12-5 | 15.3              | 8.3     | 33.1    | 60.1    | 4.6            | 16.4    |
| 1782 | Cerivastatin                                     | BRD-K81169441-236-04-1 | -7.0              | -8.8    | 17.7    | -26.3   | 24.5           | -8.7    |
| 1783 | SCH 58261                                        | BRD-K81225797-001-01-5 | -24.1             | 24.4    | 12.1    | -16.2   | 10.9           | 8.8     |
| 1784 | Dantrolene, sodium salt                          | BRD-K81272440-236-06-9 | -32.1             | 4.4     | -38.0   | -48.1   | -9.4           | -22.1   |
| 1785 | CHRYSIN DIMETHYL ETHER                           | BRD-K81298036-001-06-2 | -17.8             | -10.1   | -49.2   | -50.2   | -14.0          | -15.7   |
| 1786 | TCS 359                                          | BRD-K81376179-001-01-4 | 6.2               | 5.6     | 29.1    | 28.6    | -3.0           | 0.4     |
| 1787 | SAHA                                             | BRD-K81418486-001-18-6 | 14.4              | -5.4    | -5.4    | 0.3     | -9.0           | 5.0     |
| 1788 | TACRINE HYDROCHLORIDE                            | BRD-K81473089-003-15-4 | -3.4              | 2.4     | 12.7    | 14.0    | 10.8           | 8.6     |
| 1789 | DICYCLOHEXYLUREA                                 | BRD-K81521265-001-02-8 | -8.6              | -25.8   | 9.8     | 8.8     | 22.2           | 28.5    |
| 1790 | EIT hydrobromide                                 | BRD-K81623406-004-03-4 | 2.5               | 2.5     | 1.6     | 4.9     | 10.3           | 8.5     |
| 1791 | AQ-RA 741                                        | BRD-K81729199-001-01-0 | -3.5              | -2.0    | 12.8    | 12.1    | 5.4            | 15.2    |



| no.  | Compound<br>Name                  | Broad Institute ID     | Normalized scores |         |         |         |                |         |
|------|-----------------------------------|------------------------|-------------------|---------|---------|---------|----------------|---------|
|      |                                   |                        | HPr+ DNA          |         | CBA     |         | Amplex Red_HRP |         |
|      |                                   |                        | Plate 1           | Plate 2 | Plate 1 | Plate 2 | Plate 1        | Plate 2 |
| 1792 | PRENYLETIN                        | BRD-K81750404-001-03-3 | 40.7              | 10.5    | -12.6   | -15.7   | -18.3          | -26.8   |
| 1793 | PICROPODOPHYLLIN                  | BRD-K81829253-001-03-7 | 25.8              | 21.3    | -17.1   | 1.0     | -4.5           | 7.3     |
| 1794 | CP 93129 dihydrochloride          | BRD-K81876028-300-01-2 | 14.3              | 4.3     | 25.2    | 40.7    | 17.4           | 23.5    |
| 1795 | 1,3,5-TRIMETHOXYBENZENE           | BRD-K81884069-001-03-6 | 0.0               | 2.8     | -6.4    | 0.4     | 27.4           | 18.4    |
| 1796 | TRICLABENDAZOLE                   | BRD-K81916719-001-05-5 | 46.6              | 21.2    | 17.4    | 23.9    | 27.8           | 47.0    |
| 1797 |                                   | BRD-K81965037-001-03-2 | -83.4             | -84.6   | -78.1   | -77.6   | -60.9          | -65.9   |
| 1798 | SERTRALINE HYDROCHLORIDE          | BRD-K82036761-003-07-0 | -44.0             | -42.0   | -64.2   | -61.4   | -49.4          | -45.7   |
| 1799 | BETAMIPRON                        | BRD-K82142815-001-12-6 | 38.2              | 6.5     | 8.9     | 22.7    | 18.9           | 2.1     |
| 1800 | PYRITINOL                         | BRD-K82181219-001-01-9 | 5.9               | 10.7    | 0.1     | 11.6    | 4.1            | 15.4    |
| 1801 | 2',4'-DIHYDROXY-4-METHOXYCHALCONE | BRD-K82207906-001-01-0 | 27.8              | 2.5     | -27.6   | -14.8   | 8.5            | 2.7     |
| 1802 | ISOSORBIDE MONONITRATE            | BRD-K82225283-001-01-5 | -3.1              | -3.6    | 10.2    | 31.2    | 5.8            | 9.1     |
| 1803 | N-METHYL (-)EPHEDRINE             | BRD-K82236108-001-03-1 | 9.5               | -6.1    | -21.0   | -12.7   | 3.8            | 2.8     |
| 1804 | DICUMAROL                         | BRD-K82236179-001-06-8 | -1.2              | 6.6     | -42.8   | -50.4   | -4.5           | -1.3    |
| 1805 | PROPOFOL                          | BRD-K82255054-001-08-4 | 12.7              | 8.1     | 1.8     | 27.3    | -2.0           | 3.4     |
| 1806 | Carmoxirole hydrochloride         | BRD-K82484965-003-02-7 | 29.2              | 16.7    | 20.3    | 26.0    | 38.6           | 30.9    |
| 1807 | WHI-P180, Hydrochloride           | BRD-K82708110-003-01-5 | 64.8              | 19.2    | 12.0    | 12.8    | 16.7           | 11.5    |
| 1808 | Olomoucine                        | BRD-K82731415-001-05-4 | 20.1              | -19.0   | -1.5    | 26.5    | 12.8           | 12.7    |
| 1809 | LORATADINE                        | BRD-K82795137-001-14-8 | 5.3               | 0.6     | -40.8   | -42.5   | -4.6           | -19.7   |
| 1810 | Ro 15-4513                        | BRD-K82823076-001-01-8 | 8.7               | 7.7     | 15.9    | 7.5     | 16.8           | 24.6    |
| 1811 | ROSUVASTATIN CALCIUM              | BRD-K82941592-238-02-9 | -0.3              | -4.1    | -6.7    | 1.6     | 5.8            | 17.0    |
| 1812 | GR 135531                         | BRD-K83023055-001-01-9 | -5.1              | -5.8    | 3.7     | 18.0    | 6.0            | 10.0    |
| 1813 | SALICYLANILIDE                    | BRD-K83036479-001-04-3 | 15.7              | 42.8    | -13.4   | -3.4    | -0.5           | -1.7    |
| 1814 | RS 102895 hydrochloride           | BRD-K83063356-003-01-7 | 2.8               | -2.5    | -23.2   | -37.1   | -2.9           | -7.3    |
| 1815 | Etofylline                        | BRD-K83064458-001-05-7 | -7.6              | -3.7    | 6.5     | -4.9    | 0.1            | -3.0    |
| 1816 | (S)-(+)-Dimethindene maleate      | BRD-K83192048-050-01-9 | -15.2             | -24.3   | -4.9    | -7.2    | 8.3            | -1.7    |
| 1817 | CHLOROPYRAMINE HYDROCHLORIDE      | BRD-K83257731-003-14-4 | -12.5             | -10.4   | -45.9   | -55.5   | -24.9          | -14.9   |
| 1818 | Protopine                         | BRD-K83302049-003-01-2 | -4.9              | -20.6   | 41.6    | 19.2    | 19.4           | 20.5    |
| 1819 | L-693,403 maleate                 | BRD-K83322645-103-01-6 | 2.7               | -17.4   | 23.9    | 15.0    | 10.8           | 13.9    |
| 1820 | BARBITAL                          | BRD-K83359602-001-01-5 | 13.7              | -8.4    | -2.3    | -6.6    | 5.6            | -7.7    |
| 1821 | SINOMENINE                        | BRD-K83459933-001-03-9 | -6.6              | -2.0    | -6.7    | -0.1    | -18.4          | -25.0   |
| 1822 | FK 888                            | BRD-K83508485-001-01-9 | -18.1             | -22.6   | -35.7   | -32.7   | -14.8          | -19.9   |
| 1823 | PARGYLINE HYDROCHLORIDE           | BRD-K83597974-003-15-6 | 37.3              | 14.5    | -0.7    | 14.2    | 4.2            | -1.9    |
| 1824 | SANT-1                            | BRD-K83637872-001-01-7 | 22.0              | 31.1    | 38.1    | 29.9    | -1.0           | 12.9    |
| 1825 | 7-Chlorokynurenic acid            | BRD-K84214706-001-04-0 | -0.7              | -0.6    | 15.8    | 24.9    | 15.0           | 11.9    |
| 1826 | BRL 50481                         | BRD-K84266862-001-01-6 | 27.2              | 15.1    | 11.3    | 16.6    | 15.6           | 15.4    |
| 1827 | 2'-METHOXYFORMONETIN              | BRD-K84390227-001-03-0 | -17.6             | -21.0   | -1.1    | -3.0    | 3.5            | 11.1    |
| 1828 | R(+)-SKF-81297                    | BRD-K84421793-001-01-1 | 7.0               | 5.3     | 28.2    | 26.2    | -8.0           | -11.6   |
| 1829 | 3,4-DIMETHOXYDALBERGIONE          | BRD-K84463716-001-02-5 | 31.2              | 25.2    | -18.3   | 11.0    | -34.0          | -35.1   |
| 1830 | NATEGLINIDE                       | BRD-K84658672-001-03-0 | 7.4               | 11.4    | -8.2    | -6.9    | -5.6           | -9.4    |
| 1831 | Trequinsin hydrochloride          | BRD-K84663978-001-03-1 | -1.1              | 1.2     | -36.6   | -29.5   | -1.6           | -3.6    |
| 1832 | Caffeic acid phenethyl ester      | BRD-K84709232-001-02-6 | -9.2              | -15.4   | -84.7   | -86.2   | -67.8          | -65.3   |
| 1833 | TANSHINONE IIA SULFONATE SODIUM   | BRD-K84798689-236-01-1 | 16.1              | 16.8    | 13.0    | 17.0    | 31.6           | 30.7    |
| 1834 | SINENSETIN                        | BRD-K84996949-001-01-5 | -5.5              | 0.1     | 35.3    | 33.7    | -18.8          | -29.3   |
| 1835 | AURAPTENE                         | BRD-K85013741-001-05-9 | 20.3              | 21.9    | 82.1    | 89.4    | 30.5           | 21.5    |
| 1836 | NNC 05-2090 hydrochloride         | BRD-K85015012-003-01-1 | -18.0             | -20.7   | -96.6   | -93.1   | -70.0          | -67.0   |
| 1837 | 4'-HYDROXYCHALCONE                | BRD-K85068298-001-03-5 | 2.0               | 6.0     | -43.4   | -49.7   | -7.3           | -12.9   |

| no.  | Compound<br>Name                 | Broad Institute ID     | Normalized scores |         |         |         |                |         |
|------|----------------------------------|------------------------|-------------------|---------|---------|---------|----------------|---------|
|      |                                  |                        | HPr+ DNA          |         | CBA     |         | Amplex Red_HRP |         |
|      |                                  |                        | Plate 1           | Plate 2 | Plate 1 | Plate 2 | Plate 1        | Plate 2 |
| 1838 | PILOCARPINE NITRATE              | BRD-K85090592-008-15-1 | 15.5              | -2.6    | 8.0     | -9.2    | 4.7            | 4.2     |
| 1839 | 3-ACETAMIDOCOUMARIN              | BRD-K85104575-001-07-3 | -7.1              | 15.5    | 21.3    | 31.6    | 24.1           | 27.5    |
| 1840 | TOLBUTAMIDE                      | BRD-K85119730-001-17-2 | -0.2              | 5.4     | 13.6    | 5.1     | 3.9            | 6.6     |
| 1841 | DNQX disodium salt               | BRD-K85266041-304-01-7 | -6.0              | -17.1   | -1.8    | -20.8   | 13.2           | 7.3     |
| 1842 | RAMIFENAZONE                     | BRD-K85333151-003-08-4 | 7.6               | 5.0     | 20.1    | 15.0    | -18.6          | -18.8   |
| 1843 |                                  | BRD-K85555482-001-04-5 | -19.4             | 5.1     | -11.2   | -2.9    | 5.2            | 8.6     |
| 1844 | RESORCINOL MONOACETATE           | BRD-K85603128-001-02-7 | -12.5             | 17.1    | 9.5     | 14.7    | -3.7           | 6.5     |
| 1845 | IRIGENIN TRIMETHYL ETHER         | BRD-K85880973-001-03-5 | 5.8               | 9.7     | 7.6     | -3.1    | 5.2            | 4.7     |
| 1846 |                                  | BRD-K85883481-001-08-3 | 1.7               | 1.8     | 12.0    | 24.7    | 23.2           | 24.9    |
| 1847 | OBTUSAQUINONE                    | BRD-K85971060-001-03-6 | 58.6              | 73.9    | 7.0     | 53.8    | 6.7            | 11.8    |
| 1848 | EMF-bea1-1                       | BRD-K85985071-001-16-5 | 7.4               | 14.6    | -45.6   | -50.7   | -37.2          | -52.6   |
| 1849 | Eltoprazine hydrochloride        | BRD-K86171477-003-01-9 | 2.4               | -2.2    | 1.0     | 10.0    | 10.2           | 11.1    |
| 1850 | DIPYRIDAMOLE                     | BRD-K86301799-001-19-9 | 25.4              | 20.5    | 8.5     | 26.5    | -25.1          | -20.0   |
| 1851 | (R)-(-)-Deprenyl hydrochloride   | BRD-K86434416-003-06-4 | -10.9             | -12.2   | -2.4    | 0.4     | 15.6           | 9.2     |
| 1852 | ISO-OLOMOUCINE                   | BRD-K86509404-001-03-8 | -20.2             | -8.0    | -12.1   | -5.7    | 11.8           | 13.1    |
| 1853 | RS 79948 hydrochloride           | BRD-K86600316-003-01-2 | -3.8              | -15.3   | 24.3    | 8.1     | 6.5            | 11.1    |
| 1854 | Embelin                          | BRD-K86727142-001-06-6 | -60.7             | -69.4   | -87.6   | -86.9   | -67.8          | -71.0   |
| 1855 | Olvamil                          | BRD-K86958018-001-01-9 | 21.0              | 13.8    | 49.6    | 41.1    | -4.4           | -2.3    |
| 1856 | RS 102221 hydrochloride          | BRD-K87048468-003-01-9 | 7.0               | 9.3     | -35.6   | -33.2   | -43.1          | -35.9   |
| 1857 | Fusaric acid                     | BRD-K87049188-001-03-6 | 2.9               | -1.9    | 36.9    | 28.0    | 25.1           | 32.4    |
| 1858 | CARBIMAZOLE                      | BRD-K87156652-001-06-9 | 2.1               | -17.6   | -7.9    | -0.6    | -7.3           | -6.6    |
| 1859 | BENZAMIL HYDROCHLORIDE           | BRD-K87158025-003-01-2 | 6.3               | 10.6    | -12.9   | -18.5   | 4.1            | 6.1     |
| 1860 | ?-CCB                            | BRD-K87349602-001-02-0 | 1.1               | -0.2    | 32.4    | 20.5    | 10.8           | 5.3     |
| 1861 | TrkA Inhibitor                   | BRD-K87484409-001-01-2 | 0.2               | 16.8    | 15.2    | -2.8    | 17.4           | 13.3    |
| 1862 | SULFAMETER                       | BRD-K87492696-001-09-0 | 8.8               | -3.9    | 4.1     | 23.8    | 22.1           | 26.9    |
| 1863 | RS 504393                        | BRD-K87510569-001-01-0 | 18.6              | 6.3     | -12.2   | -10.3   | -0.9           | -6.0    |
| 1864 | MPMQ hydrochloride               | BRD-K87696786-003-01-0 | 0.3               | -4.6    | 0.1     | -16.1   | 0.1            | -1.7    |
| 1865 | CETYLPYRIDINIUM CHLORIDE         | BRD-K87700323-003-03-6 | -93.8             | -94.0   | -83.5   | -82.2   | -79.5          | -77.1   |
| 1866 | DUARTIN, DIMETHYL ETHER          | BRD-K87798455-001-03-4 | -4.7              | -2.2    | -15.4   | -19.6   | 9.8            | -3.9    |
| 1867 | AG-825                           | BRD-K87919739-001-04-2 | -1.4              | -6.5    | -4.7    | -1.8    | -21.1          | -5.1    |
| 1868 | PIMETHIXENE MALEATE              | BRD-K88090157-050-06-6 | -6.5              | 0.4     | -61.9   | -57.4   | -39.4          | -44.5   |
| 1869 | ASARYLALDEHYDE                   | BRD-K88219015-001-05-8 | -7.8              | 27.7    | 11.5    | 18.9    | 4.5            | 7.4     |
| 1870 | WIN 55,212-2 mesylate            | BRD-K88282786-066-04-9 | 23.7              | 15.5    | -58.9   | -59.3   | 7.7            | 4.5     |
| 1871 | 2,5-DI-t-BUTYL-4-HYDROXY ANISOLE | BRD-K88329126-001-01-0 | -10.2             | -15.2   | -45.9   | -29.6   | -22.0          | -41.0   |
| 1872 | Xaliproden hydrochloride         | BRD-K88358234-003-01-4 | -1.9              | -10.1   | 10.7    | -1.4    | 6.9            | 8.3     |
| 1873 | TRIMETAZIDINE DIHYDROCHLORIDE    | BRD-K88366685-300-04-5 | -8.3              | -2.4    | 3.8     | 13.5    | 20.1           | 7.1     |
| 1874 | THONZYLAMINE HYDROCHLORIDE       | BRD-K88405679-003-02-3 | 9.5               | 5.2     | -0.1    | 9.2     | 9.2            | -2.5    |
| 1875 | PYRIMETHAMINE                    | BRD-K88429204-001-18-7 | 16.9              | -6.1    | -25.8   | -3.2    | -13.8          | -12.1   |
| 1876 | IPRONIAZID SULFATE               | BRD-K88568253-065-03-9 | 32.6              | 35.0    | 22.6    | 15.5    | 11.2           | 2.6     |
| 1877 | ANIRACETAM                       | BRD-K88611939-001-13-3 | 16.5              | 2.0     | 13.9    | 18.9    | 28.1           | 21.8    |
| 1878 | NONOXYNOL-9                      | BRD-K88625236-001-03-4 | -104.8            | -98.6   | -112.6  | -113.2  | -77.3          | -77.1   |
| 1879 | ARECOLINE HYDROBROMIDE           | BRD-K88646909-004-10-5 | 4.0               | 13.3    | 8.9     | 39.6    | 39.5           | 46.5    |
| 1880 | PD 198306                        | BRD-K88677950-001-01-3 | 2.6               | 13.0    | 26.5    | 12.2    | 27.9           | 18.1    |
| 1881 | CHLOROTHIAZIDE                   | BRD-K88682005-001-07-5 | 2.2               | 40.6    | 5.2     | 4.3     | 27.6           | 24.5    |
| 1882 | Methyl 2,5-dihydroxycinnamate    | BRD-K88741031-001-01-0 | 34.5              | 41.1    | 16.5    | 4.0     | -42.5          | -45.5   |
| 1883 | EMD 66684                        | BRD-K88759641-003-01-0 | 2.7               | -11.2   | 11.0    | 4.4     | 12.3           | 16.4    |

| no.  | Compound<br>Name                                          | Broad Institute ID     | Normalized scores |         |         |         |                |         |
|------|-----------------------------------------------------------|------------------------|-------------------|---------|---------|---------|----------------|---------|
|      |                                                           |                        | HPr+ DNA          |         | CBA     |         | Amplex Red_HRP |         |
|      |                                                           |                        | Plate 1           | Plate 2 | Plate 1 | Plate 2 | Plate 1        | Plate 2 |
| 1884 | LOBARIC ACID                                              | BRD-K88849294-001-08-8 | -42.2             | -54.4   | -83.8   | -79.9   | -73.6          | -74.0   |
| 1885 | OBLIQUIN                                                  | BRD-K88954184-001-03-0 | 1.5               | -1.3    | 25.1    | 40.8    | 10.5           | 4.2     |
| 1886 | Cdk Inhibitor, p35                                        | BRD-K88988070-001-01-9 | 7.7               | -10.9   | 9.4     | -6.0    | 11.4           | 21.3    |
| 1887 | ALVERINE CITRATE                                          | BRD-K89055274-048-14-4 | 12.7              | 16.0    | -11.1   | -8.4    | -1.4           | -8.8    |
| 1888 | CHLOROCRESOL                                              | BRD-K89056082-001-03-6 | 27.2              | 26.8    | -0.5    | 13.8    | -17.3          | -19.9   |
| 1889 | EMD 41000                                                 | BRD-K89271983-001-01-5 | -22.7             | -25.9   | -10.0   | 7.1     | -6.5           | 3.1     |
| 1890 | NPPB                                                      | BRD-K89272762-001-07-7 | 12.3              | 2.1     | -27.5   | -39.4   | -17.1          | -14.5   |
| 1891 | DMP 543                                                   | BRD-K89274813-001-01-5 | -7.3              | 4.5     | -9.7    | -7.2    | 1.8            | -5.3    |
| 1892 | PIRENZEPINE HYDROCHLORIDE                                 | BRD-K89375097-300-06-2 | 27.0              | 14.8    | -11.5   | 15.6    | -9.7           | 1.2     |
| 1893 | L 655240                                                  | BRD-K89402695-001-01-5 | -58.9             | -41.5   | -94.4   | -92.2   | -76.0          | -68.2   |
| 1894 | CHLORPHENIRAMINE (S) MALEATE                              | BRD-K89595132-050-03-0 | -10.4             | -8.7    | -13.1   | 0.8     | 8.2            | -1.8    |
| 1895 | VINCAMINE                                                 | BRD-K89704198-001-08-1 | 2.5               | 36.9    | 19.9    | 27.4    | 11.6           | 11.2    |
| 1896 | TRIFLUOPERAZINE HYDROCHLORIDE                             | BRD-K89732114-300-07-1 | -80.3             | -92.5   | -94.8   | -94.0   | -88.6          | -88.6   |
| 1897 | AG 592                                                    | BRD-K89930444-001-01-9 | 58.5              | 58.3    | -14.1   | -24.0   | -9.9           | -8.4    |
| 1898 | GALANGIN TRIMETHYL ETHER                                  | BRD-K89975061-001-02-4 | -9.5              | 7.5     | -15.2   | -14.1   | -19.1          | -31.5   |
| 1899 | CHLORPROMAZINE                                            | BRD-K89997465-001-05-3 | -81.0             | -78.3   | -95.6   | -96.0   | -87.3          | -86.5   |
| 1900 | AMPROLIUM                                                 | BRD-K90027121-300-08-2 | 37.5              | 11.6    | 13.3    | 12.2    | 22.0           | 24.9    |
| 1901 | 5-Iodo-A-85380 dihydrochloride                            | BRD-K90065682-300-01-8 | -9.2              | -2.8    | 3.7     | 6.9     | 1.4            | 21.4    |
| 1902 | DIMETHYL 4,4-o-PHENYLENE-BIS (3-THIOPHANATE)              | BRD-K90168339-001-04-5 | 4.7               | -2.7    | 27.0    | 25.9    | 21.0           | 8.6     |
| 1903 |                                                           | BRD-K90230846-001-04-9 | 17.8              | 31.0    | 37.7    | 35.2    | -14.9          | -3.2    |
| 1904 | W-7 hydrochloride                                         | BRD-K90259198-003-07-1 | -38.3             | -41.5   | -70.3   | -66.4   | -42.2          | -48.0   |
| 1905 | MY-5445                                                   | BRD-K90524085-001-06-0 | -6.5              | 4.9     | -30.2   | -32.3   | 4.5            | -1.1    |
| 1906 | 2-Phenylbenzimidazole                                     | BRD-K90551865-001-05-1 | 5.7               | 32.9    | 17.7    | 9.7     | 23.3           | 16.5    |
| 1907 | Ipsapirone                                                | BRD-K90574421-001-01-9 | -16.5             | -21.5   | -7.2    | -14.6   | 13.6           | 14.3    |
| 1908 | EPIAFZELECHIN (2R,3R)(-)                                  | BRD-K90607708-001-03-7 | 24.2              | 4.4     | -2.6    | -11.9   | 1.4            | -4.2    |
| 1909 | Nefazodone hydrochloride                                  | BRD-K90789829-003-03-3 | -0.6              | -1.5    | -52.2   | -52.9   | -31.9          | -27.3   |
| 1910 | SR 142948                                                 | BRD-K91243525-001-01-5 | -1.9              | 5.2     | 19.5    | 19.5    | 9.9            | 13.6    |
| 1911 | ANISOMYCIN                                                | BRD-K91370081-001-17-8 | 27.0              | 19.7    | -4.6    | 9.4     | 17.7           | 2.8     |
| 1912 | PICEATANNOL                                               | BRD-K91509126-001-04-6 | 47.4              | 44.5    | -19.9   | -17.6   | -59.2          | -58.3   |
| 1913 | DIOSMIN                                                   | BRD-K91548452-001-03-0 | 95.3              | 109.4   | 20.3    | 27.7    | 8.4            | 12.6    |
| 1914 | 4-HQN                                                     | BRD-K91758890-001-03-5 | -14.4             | -10.0   | 4.8     | -4.3    | 19.4           | 12.7    |
| 1915 | 3H-1,2-DITHIOLE-3-THIONE                                  | BRD-K91781484-001-01-3 | -11.0             | -11.8   | 17.6    | 27.1    | 11.2           | 15.0    |
| 1916 | 2-[1-(4-Piperonyl)piperazinyl]benzothiazole               | BRD-K91868854-001-02-8 | -1.8              | -10.7   | 8.5     | 3.6     | 4.5            | -1.8    |
| 1917 | SD 169                                                    | BRD-K91904471-001-01-6 | -19.8             | -30.2   | 23.9    | 24.5    | 11.9           | 20.3    |
| 1918 | AM 251                                                    | BRD-K92000912-001-06-8 | -9.4              | -14.0   | -24.9   | -25.2   | -8.3           | -6.1    |
| 1919 | GBR 12783                                                 | BRD-K92015269-001-01-6 | 0.9               | -14.0   | -32.0   | -25.2   | -14.4          | -10.4   |
| 1920 | TRIAMTERENE                                               | BRD-K92049597-001-10-9 | 10.0              | -4.8    | 81.8    | 89.1    | -8.8           | -30.2   |
| 1921 | 3-HYDROXY-3',4'-DIMETHOXYFLAVONE                          | BRD-K92171060-001-03-4 | 62.7              | 92.4    | 11.2    | 13.0    | 6.2            | 5.8     |
| 1922 | 5-Carboxamidotryptamine maleate                           | BRD-K92382976-103-01-8 | -4.3              | -13.7   | 33.4    | -6.5    | 8.2            | 11.0    |
| 1923 | MYCOPHENOLATE MOFETIL                                     | BRD-K92428153-001-01-0 | 67.5              | 37.8    | 43.1    | 23.0    | 24.1           | 19.7    |
| 1924 | LY255283                                                  | BRD-K92492521-001-01-1 | -37.8             | -36.8   | -76.1   | -84.7   | -23.7          | -34.1   |
| 1925 | 2-Chloro-11-(4-methylpiperazino)dibenz[b,f]oxepin maleate | BRD-K92588747-051-01-9 | -23.7             | -19.6   | 25.6    | 27.2    | -34.5          | -45.4   |
| 1926 |                                                           | BRD-K92723993-066-04-5 | -28.7             | -30.2   | -40.9   | -31.0   | -27.9          | -35.2   |
| 1927 | PERINDOPRIL ERBUMINE                                      | BRD-K92731339-227-03-1 | -6.1              | -8.0    | -11.3   | -6.4    | -1.7           | 8.6     |
| 1928 | MEFENAMIC ACID                                            | BRD-K92778217-001-17-8 | 38.6              | 16.3    | -5.4    | 10.5    | -0.7           | 14.5    |
| 1929 | (R)-(+)-Propranolol hydrochloride                         | BRD-K92830582-003-04-8 | -2.0              | -4.7    | -18.0   | 2.3     | -18.8          | -4.0    |

| no.  | Compound<br>Name                                         | Broad Institute ID     | Normalized scores |         |         |         |                |         |
|------|----------------------------------------------------------|------------------------|-------------------|---------|---------|---------|----------------|---------|
|      |                                                          |                        | HPr+ DNA          |         | CBA     |         | Amplex Red_HRP |         |
|      |                                                          |                        | Plate 1           | Plate 2 | Plate 1 | Plate 2 | Plate 1        | Plate 2 |
| 1930 | 2,4,5-TRICHLOROPHOXYACETIC ACID                          | BRD-K92860374-001-03-3 | -2.9              | -3.2    | -6.0    | 7.0     | 21.2           | 15.1    |
| 1931 | Melperone hydrochloride                                  | BRD-K92984783-003-02-4 | -1.5              | -10.0   | -10.7   | -3.7    | 8.9            | 11.2    |
| 1932 | ARC 239 dihydrochloride                                  | BRD-K93188295-300-01-4 | 23.7              | 16.0    | 17.4    | 43.5    | 2.0            | -8.4    |
| 1933 | PIMPINELLIN                                              | BRD-K93197368-001-03-7 | 15.8              | -24.2   | -19.6   | -19.0   | 7.1            | -1.2    |
| 1934 | ETHAMBUTOL HYDROCHLORIDE                                 | BRD-K93231391-300-03-1 | 2.8               | -6.7    | -9.9    | 7.6     | -1.0           | 3.0     |
| 1935 | DINITOLMIDE                                              | BRD-K93240442-001-04-3 | 47.3              | 22.5    | 14.4    | 39.1    | 14.7           | 26.3    |
| 1936 | GW 9662                                                  | BRD-K93258693-001-05-8 | -9.9              | -3.8    | 21.4    | 15.7    | 29.3           | 18.4    |
| 1937 | Lamotrigine isethionate                                  | BRD-K93460210-071-01-6 | 24.6              | -1.7    | 0.4     | 5.9     | 5.2            | 10.4    |
| 1938 | BUSPIRONE HYDROCHLORIDE                                  | BRD-K93461745-003-14-4 | 4.6               | 8.6     | 11.0    | 11.6    | 29.5           | 23.5    |
| 1939 | SULFAMERAZINE                                            | BRD-K93524252-001-15-5 | 11.5              | 17.5    | 24.6    | 28.5    | 22.1           | 23.0    |
| 1940 | N-Chlorophenyl-N-hexylpiperazine                         | BRD-K93541117-001-01-4 | 5.6               | -12.7   | -20.3   | -15.3   | 8.0            | 16.9    |
| 1941 |                                                          | BRD-K93568044-001-11-4 | -9.6              | -25.3   | 2.1     | -3.4    | 17.3           | 13.4    |
| 1942 | DIACETAMATE                                              | BRD-K93611241-001-01-4 | -14.2             | -0.7    | -12.8   | -9.8    | -14.4          | -23.0   |
| 1943 | TADALAFIL                                                | BRD-K93645900-001-04-8 | 21.8              | -5.0    | -4.2    | -8.6    | -6.7           | -12.8   |
| 1944 | K-252c                                                   | BRD-K93879806-001-01-4 | 188.9             | 55.2    | 14.0    | 19.6    | 12.6           | 12.8    |
| 1945 | DIETHYLTOLUAMIDE                                         | BRD-K94080537-001-05-5 | -1.0              | 7.8     | -11.2   | -4.6    | 16.8           | 13.5    |
| 1946 | COTININE                                                 | BRD-K94144010-001-09-7 | 6.2               | 1.7     | 0.1     | 12.5    | 0.1            | -7.4    |
| 1947 | PAEONOL                                                  | BRD-K94239562-001-03-0 | 2.6               | 5.8     | 23.1    | 33.3    | 11.2           | 8.5     |
| 1948 | RONIDAZOLE                                               | BRD-K94266545-001-15-9 | -2.3              | 0.5     | 5.7     | 8.1     | 18.6           | 22.2    |
| 1949 | SCH 39166 hydrobromide                                   | BRD-K94270326-004-01-0 | 0.8               | 6.4     | -19.8   | -7.7    | -7.2           | -10.0   |
| 1950 | METAMECONINE                                             | BRD-K94324294-001-03-5 | -10.4             | -7.5    | -10.5   | -11.2   | 3.9            | 14.8    |
| 1951 | KINETIN RIBOSIDE                                         | BRD-K94325918-001-05-3 | 12.9              | 5.9     | 36.5    | 16.1    | 16.0           | 17.7    |
| 1952 | BML-190                                                  | BRD-K94379058-001-03-5 | -10.2             | -13.4   | -23.4   | -18.3   | -17.8          | -16.4   |
| 1953 | Mevastatin                                               | BRD-K94441233-001-03-1 | 26.9              | -8.1    | -36.4   | -42.5   | -7.2           | -12.7   |
| 1954 | AMI-193                                                  | BRD-K94512704-001-02-1 | -6.2              | 6.7     | -17.3   | 16.5    | 7.6            | -1.0    |
| 1955 | PINOCEMBRIN                                              | BRD-K94689771-001-02-5 | -5.9              | -3.6    | 6.2     | 10.8    | -1.2           | -4.1    |
| 1956 | CHROMOCARB                                               | BRD-K94720315-001-05-4 | 6.4               | -11.7   | 8.6     | 8.9     | 13.0           | -0.6    |
| 1957 | Y 134                                                    | BRD-K94832621-001-01-5 | -16.4             | -12.0   | -53.2   | -50.5   | -40.8          | -42.7   |
| 1958 | (+)-Anabasine hydrochloride                              | BRD-K94837957-003-01-4 | 55.9              | 51.1    | 31.9    | 44.8    | 47.0           | 37.4    |
| 1959 | 1-(3-trifluoromethyl) phenylpiperazine monohydrochloride | BRD-K94887716-001-01-5 | 10.6              | 15.2    | 13.9    | 13.0    | 29.3           | 20.9    |
| 1960 | DR 2313                                                  | BRD-K94920105-001-01-3 | -7.5              | -9.0    | -2.7    | 0.1     | 5.5            | 10.9    |
| 1961 | ISOBUTYLMETHYLXANTHINE                                   | BRD-K94979336-001-09-3 | 8.1               | 7.8     | 14.6    | 12.3    | 17.9           | 15.9    |
| 1962 | APOTOXICAROL                                             | BRD-K95048371-001-01-9 | 23.3              | 20.4    | -11.0   | -0.7    | 7.0            | 1.0     |
| 1963 | OCTISALATE                                               | BRD-K95161686-001-01-0 | 20.4              | 15.3    | -27.8   | 46.0    | 4.9            | 22.5    |
| 1964 | PROBENECID                                               | BRD-K95237249-001-15-8 | -1.0              | -23.5   | 9.6     | 15.1    | 7.1            | -0.2    |
| 1965 | DIENESTROL                                               | BRD-K95309561-001-15-5 | 14.0              | 14.5    | -67.6   | -47.3   | -22.7          | -6.3    |
| 1966 | PHA 665752                                               | BRD-K95435023-001-01-0 | -37.3             | -19.4   | -96.8   | -92.0   | -50.0          | -56.4   |
| 1967 | SINAPIC ACID                                             | BRD-K95487349-001-04-2 | -18.0             | -7.8    | 55.5    | 94.8    | -31.7          | -32.3   |
| 1968 | PICROTOXININ                                             | BRD-K95554982-001-04-1 | 14.2              | 17.8    | -3.8    | 25.6    | 15.1           | 16.1    |
| 1969 | (S)-(-)-Pindolol                                         | BRD-K95598440-001-03-6 | 2.5               | -11.3   | 21.0    | 5.6     | 3.9            | 10.4    |
| 1970 | BHQ                                                      | BRD-K95603879-001-06-7 | 45.3              | 51.4    | 34.3    | 28.9    | 15.4           | 16.8    |
| 1971 | BMS 191011                                               | BRD-K95609758-001-01-1 | -17.0             | -29.2   | -70.2   | -71.8   | -49.2          | -46.0   |
| 1972 | Tetrabenazine                                            | BRD-K95739795-001-01-1 | -3.7              | -3.4    | 14.8    | 14.5    | -3.2           | 9.4     |
| 1973 | Trapidil                                                 | BRD-K95763993-001-03-7 | 1.4               | -12.7   | 13.1    | -1.1    | 1.9            | 8.7     |
| 1974 | CGP 13501                                                | BRD-K95851186-001-02-9 | 12.9              | -5.8    | 2.6     | 11.1    | 14.3           | 20.9    |
| 1975 | HEXAMETHYLQUERCETAGETIN                                  | BRD-K95885906-001-01-8 | -14.8             | -17.1   | -20.9   | -5.0    | -18.8          | -25.6   |

| no.  | Compound<br>Name                           | Broad Institute ID     | Normalized scores |         |         |         |                |         |
|------|--------------------------------------------|------------------------|-------------------|---------|---------|---------|----------------|---------|
|      |                                            |                        | HPr+ DNA          |         | CBA     |         | Amplex Red_HRP |         |
|      |                                            |                        | Plate 1           | Plate 2 | Plate 1 | Plate 2 | Plate 1        | Plate 2 |
| 1976 | LY 344864 hydrochloride                    | BRD-K95899059-003-01-0 | -2.1              | -24.9   | -10.7   | -15.1   | 1.2            | 0.1     |
| 1977 | RESERPINE                                  | BRD-K95921201-001-07-0 | -8.1              | -1.6    | -16.5   | 2.6     | -13.0          | -10.6   |
| 1978 | ISAXONINE                                  | BRD-K95957366-001-01-8 | 33.2              | 5.5     | 4.0     | 25.3    | 12.0           | 12.6    |
| 1979 | 1-Acetyl-4-methylpiperazine hydrochloride  | BRD-K96055017-003-01-9 | 7.7               | 36.7    | -6.1    | 12.7    | 5.1            | 11.0    |
| 1980 | SCOPOLETIN                                 | BRD-K96163925-001-09-9 | 41.0              | 24.3    | 53.7    | 59.0    | -9.8           | -6.4    |
| 1981 | CEPHARANTHINE                              | BRD-K96194081-001-06-0 | -19.6             | -10.7   | -44.2   | -34.6   | -29.4          | -33.6   |
| 1982 | DIMETHYLCAFFEIC ACID                       | BRD-K96256403-001-05-0 | -4.1              | 5.9     | -1.5    | -17.7   | 0.0            | -1.4    |
| 1983 | GW 7647                                    | BRD-K96263742-001-02-3 | -95.3             | -97.0   | -132.9  | -131.0  | -78.3          | -82.8   |
| 1984 | PHENTERMINE                                | BRD-K96319534-001-01-7 | 24.1              | 15.4    | 21.1    | 10.5    | -1.1           | 7.2     |
| 1985 | NIFEDIPINE                                 | BRD-K96354014-001-10-4 | 120.8             | 119.2   | 27.8    | 24.8    | -42.8          | -44.8   |
| 1986 | CHLORAMPHENICOL PALMITATE                  | BRD-K96424892-001-01-1 | -1.1              | 30.2    | 1.1     | 43.0    | 8.8            | 14.5    |
| 1987 | LEOIDIN                                    | BRD-K96660256-001-03-6 | -48.5             | -47.9   | -100.2  | -100.4  | -78.0          | -77.6   |
| 1988 | SR 49059                                   | BRD-K96720755-001-01-8 | -24.5             | 7.7     | -4.1    | -5.9    | 0.2            | -11.1   |
| 1989 | SKF 86002 dihydrochloride                  | BRD-K96809896-300-01-5 | 22.2              | -19.9   | -0.9    | 11.3    | 15.2           | 13.8    |
| 1990 | Pirfenidone                                | BRD-K96862998-001-03-1 | -3.2              | -2.7    | 3.4     | -2.6    | 8.4            | 9.4     |
| 1991 | QUININE ETHYL CARBONATE                    | BRD-K97028990-001-03-6 | 2.9               | 4.6     | 6.1     | -6.3    | 15.6           | 7.4     |
| 1992 | TBB                                        | BRD-K97118047-001-02-0 | -60.2             | -57.1   | -94.6   | -100.0  | -44.3          | -48.3   |
| 1993 | 3-METHOXYCATECHOL                          | BRD-K97139501-001-03-3 | 77.8              | 83.5    | 45.5    | 45.1    | -58.9          | -59.4   |
| 1994 | DROPERIDOL                                 | BRD-K97158071-001-08-2 | -1.1              | -3.8    | -13.7   | -2.8    | 17.4           | 13.7    |
| 1995 | THIOTHIXENE                                | BRD-K97309399-001-05-2 | -64.3             | -59.6   | -73.1   | -73.0   | -53.1          | -52.2   |
| 1996 | PI 828                                     | BRD-K97365803-001-01-3 | -5.9              | -10.5   | 2.7     | 24.4    | 2.6            | 9.2     |
| 1997 | QUERCETIN                                  | BRD-K97399794-001-09-6 | 58.3              | 76.5    | -16.7   | 8.0     | -22.9          | -42.0   |
| 1998 | ACEDAPSONE                                 | BRD-K97417064-001-01-6 | -20.7             | -22.7   | -27.3   | -17.8   | 4.0            | -3.3    |
| 1999 | coumestrol                                 | BRD-K97509413-001-01-8 | -3.7              | -8.4    | 71.4    | 43.2    | -37.2          | -39.0   |
| 2000 | MELATONIN                                  | BRD-K97530723-001-11-8 | -14.0             | -0.5    | 30.4    | 40.8    | 21.2           | 9.3     |
| 2001 | Mepyramine maleate                         | BRD-K97564742-103-01-9 | 42.4              | 24.5    | 12.3    | 9.0     | 4.4            | 2.0     |
| 2002 | THYMOQUINONE                               | BRD-K97566842-001-03-5 | 26.1              | 23.6    | -1.5    | -1.9    | 30.4           | 11.7    |
| 2003 | CHLORPROPAMIDE                             | BRD-K97746869-001-15-5 | -1.7              | 10.0    | 9.9     | 19.8    | 15.7           | 26.8    |
| 2004 | Nicorandil                                 | BRD-K97752965-001-01-6 | -4.4              | -23.9   | -2.2    | 0.2     | 7.1            | 7.2     |
| 2005 | PDGF Receptor Tyrosine Kinase Inhibitor II | BRD-K97922702-001-01-3 | -0.4              | 6.1     | 19.2    | 24.5    | 36.6           | 28.9    |
| 2006 |                                            | BRD-K98039984-001-06-3 | -9.7              | 14.0    | -1.3    | -4.3    | 2.7            | 8.1     |
| 2007 | Compound W                                 | BRD-K98143539-001-01-4 | -60.1             | -51.9   | -92.9   | -91.5   | -35.0          | -38.8   |
| 2008 | SIB 1757                                   | BRD-K98157055-001-04-2 | 59.6              | 30.3    | 53.3    | 31.4    | 27.0           | 28.3    |
| 2009 | CHLORZOXAZONE                              | BRD-K98174813-001-08-1 | 9.3               | 7.1     | 6.2     | 17.6    | 12.5           | 9.5     |
| 2010 | ANGOLENSIN (R)                             | BRD-K98281970-001-03-4 | -3.9              | -11.1   | -51.3   | -21.4   | -21.4          | -17.6   |
| 2011 | N-Ethylmaleimide                           | BRD-K98297262-001-01-1 | -5.2              | -12.8   | 3.5     | 12.0    | 19.6           | 37.1    |
| 2012 | AMSACRINE                                  | BRD-K98490050-001-01-8 | -74.8             | -82.7   | -99.3   | -98.9   | -84.7          | -82.9   |
| 2013 | CLONIDINE HYDROCHLORIDE                    | BRD-K98530306-003-07-6 | 66.3              | 59.8    | 19.6    | 17.3    | 13.0           | 8.3     |
| 2014 | Parthenolide                               | BRD-K98548675-001-02-6 | -39.1             | -45.7   | -79.0   | -75.5   | -53.8          | -43.8   |
| 2015 | 4-HYDROXYINDOLE                            | BRD-K98735139-001-01-1 | 17.8              | -3.9    | -23.7   | -16.4   | -71.0          | -68.2   |
| 2016 | CHLOROACETOXYQUINOLINE                     | BRD-K98737600-001-02-5 | 8.3               | 16.1    | 15.9    | 31.9    | -22.1          | -25.1   |
| 2017 | NIFLUMIC ACID                              | BRD-K98763141-001-17-5 | 9.4               | 27.2    | -8.6    | 3.5     | 8.3            | 3.7     |
| 2018 | FUMAZENIL                                  | BRD-K98769987-001-12-0 | 17.1              | -19.7   | -6.3    | 6.5     | 13.2           | 14.3    |
| 2019 | Felbamate                                  | BRD-K99107520-001-09-2 | -6.2              | -20.0   | -23.0   | 0.7     | -2.2           | 0.2     |
| 2020 | DIBUCAINE HYDROCHLORIDE                    | BRD-K99121711-003-12-2 | -28.4             | -16.1   | -35.7   | -29.2   | -48.2          | -41.0   |
| 2021 | SB 203580, Sulfone                         | BRD-K99291625-001-02-3 | -3.4              | 2.8     | -6.2    | -11.6   | 12.7           | 17.2    |

| no.  | Compound                                              |                        | Normalized scores |         |         |         |                |         |
|------|-------------------------------------------------------|------------------------|-------------------|---------|---------|---------|----------------|---------|
|      | Name                                                  | Broad Institute ID     | HPr+ DNA          |         | CBA     |         | Amplex Red_HRP |         |
|      |                                                       |                        | Plate 1           | Plate 2 | Plate 1 | Plate 2 | Plate 1        | Plate 2 |
| 2022 | ANTAZOLINE PHOSPHATE                                  | BRD-K99300445-011-12-8 | 7.8               | 14.0    | -20.6   | 19.4    | -18.3          | 0.3     |
| 2023 | TUBOCURARINE CHLORIDE                                 | BRD-K99621550-003-03-4 | 2.5               | 15.3    | 8.3     | 28.6    | 7.8            | 7.9     |
| 2024 | BUTACAINE                                             | BRD-K99622919-001-15-6 | 13.3              | 4.1     | 21.1    | 23.8    | 10.3           | -17.8   |
| 2025 | HEXACHLOROPHENE                                       | BRD-K99792991-001-18-2 | -70.4             | -66.2   | -83.8   | -83.5   | -64.6          | -64.3   |
| 2026 | DPO-1                                                 | BRD-K99922388-001-01-2 | 29.5              | 17.6    | 2.0     | 11.6    | 16.0           | 13.7    |
| 2027 | FLUNIXIN MEGLUMINE                                    | BRD-K99984802-100-06-9 | 27.3              | 2.5     | 2.6     | 15.1    | 6.9            | 5.2     |
| 2028 | Formoterol hemifumarate                               | BRD-M00539986-051-01-1 | 16.5              | 12.6    | 13.4    | 16.5    | -3.9           | -4.2    |
| 2029 | 4-Phenyl-1,2,3,4-tetrahydroisoquinoline hydrochloride | BRD-M10474530-001-02-3 | -3.8              | -19.9   | -3.8    | 7.7     | 3.1            | -6.7    |
